# Supplementary material
Source: PubMed Central journal article supplement (PMC4813298)

# Catalytic S<sub>N</sub>2'- and Enantioselective Allylic Substitution with a Diborylmethane Reagent and Application in Synthesis

Ying Shi and Amir H. Hoveyda\*

Department of Chemistry, Merkert Chemistry Center, Boston College, Chestnut Hill, Massachusetts 02467

e-mail: [amir.hoveyda@bc.edu](mailto:amir.hoveyda@bc.edu)

## SUPPORTING INFORMATION

### *Table of Contents*

|          |                                                                                                                                         |           |
|----------|-----------------------------------------------------------------------------------------------------------------------------------------|-----------|
| <b>1</b> | <b>General .....</b>                                                                                                                    | <b>2</b>  |
| <b>2</b> | <b>Reagents .....</b>                                                                                                                   | <b>2</b>  |
| <b>3</b> | <b>Characterization Data for Previously Unreported Allylic Phosphates .....</b>                                                         | <b>4</b>  |
| <b>4</b> | <b>Representative Procedure for NHC–Cu-Catalyzed Enantioselective Methylene-Boryl Addition to Disubstituted Allylic Phosphates.....</b> | <b>4</b>  |
| <b>5</b> | <b>Characterization Data for Alcohols with a <i>Tertiary</i> Carbon Stereogenic Center .....</b>                                        | <b>5</b>  |
| <b>6</b> | <b>Formal Synthesis of Rhopaloic Acid A.....</b>                                                                                        | <b>14</b> |
| 6.1      | NHC–Cu-Catalyzed EAS with Allylic Phosphate 2p .....                                                                                    | 14        |
| 6.2      | Palladium-catalyzed Suzuki Cross Coupling with Alkenyl Iodide.....                                                                      | 15        |
| 6.3      | Deprotection/Cu-catalyzed Allylic Substitution to Deliver Terminal Olefin 18 .....                                                      | 16        |
| 6.4      | Ru-catalyzed Cross Metathesis with Acrolein.....                                                                                        | 16        |
| 6.5      | Catalytic Oxa-Michael Addition .....                                                                                                    | 17        |
| <b>7</b> | <b><sup>1</sup>H NMR and <sup>13</sup>C NMR Spectra .....</b>                                                                           | <b>17</b> |

## 1 General

Infrared (IR) spectra were recorded on a Bruker FT-IR Alpha (ATR mode) spectrophotometer,  $\lambda_{\text{max}}$  in  $\text{cm}^{-1}$ . Bands are characterized as broad (br), strong (s), medium (m), and weak (w).  $^1\text{H}$  NMR spectra were recorded on a Varian Unity INOVA 400 (400 MHz) or Varian Unity INOVA 600 (600 MHz) spectrometer. Chemical shifts are reported in ppm from tetramethylsilane with the solvent resonance as the internal standard ( $\text{CDCl}_3$ ;  $\delta$  7.26 ppm). Data are reported as follows: chemical shift, integration, multiplicity (s = singlet, d = doublet, t = triplet, q = quartet, br = broad, m = multiplet), and coupling constant (Hz).  $^{13}\text{C}$  NMR spectra were recorded on a Varian Unity INOVA 400 (100 MHz) spectrometer with complete proton decoupling. Chemical shifts are reported in ppm from tetramethylsilane with the solvent resonance as the internal standard ( $\text{CDCl}_3$ ;  $\delta$  77.16 ppm). High-resolution mass spectrometry was performed on a JEOL AccuTOF DART (positive mode) at the Mass Spectrometry Facility, Boston College. Enantiomer ratios were determined by GC analysis (Alltech Associated Chiraldex B-DM (30 m x 0.25 mm), Chiraldex G-TA (30 m x 0.25 mm), and Betadex 120 column (30 m x 0.25 mm)), or HPLC analysis (Chiral Technologies Chiralpak AZ-H (4.6 x 250 mm) in comparison with authentic racemic materials). Specific rotations were measured on an ATAGO<sup>®</sup> AP-300 Automatic Polarimeter or a Rudolph Research Analytical Autopol IV Polarimeter. Melting points were measured on a Thomas Hoover capillary melting point apparatus and are uncorrected.

Unless otherwise noted, all reactions were carried out with distilled and degassed solvents under an atmosphere of dry  $\text{N}_2$  in oven- (135 °C) or flame-dried glassware with standard dry box or vacuum-line techniques. Solvents were purified under a positive pressure of dry argon by a modified Innovative Technologies purification system: toluene, benzene and hexanes were purified through a copper oxide and alumina column;  $\text{CH}_2\text{Cl}_2$  and  $\text{Et}_2\text{O}$  were purged with Ar and purified by passage through two alumina columns. Tetrahydrofuran (Aldrich Chemical Co.) was purified by distillation from sodium benzophenone ketyl immediately prior to use unless otherwise specified. All work-up and purification procedures were carried out with reagent grade solvents (purchased from Fisher Scientific, Inc.) in air.

## 2 Reagents

**Allyl phosphate** was purchased from Aldrich and used as received.

**Benzoic acid (BzOH)** was purchased from Aldrich and used as received.

**[1,1'-Bis(diphenylphosphino)ferrocene]palladium(II) dichloride ( $\text{PdCl}_2(\text{dppf})$ )** was purchased from TCI chemicals and used as received.

**Bis[(pinacolato)boryl]methane ( $\text{CH}_2\text{B}_2(\text{pin})_2$ )** was purchased from TCI chemicals and used as received.

**1,3-Bis(2,4,6-trimethylphenyl)imidazolium chloride (SIMes)** was purchased from Aldrich and used as received.

**9-Borabicyclo[3.3.1]nonane dimer (9-BBN)** was purchased from Aldrich and used as received.

**(E)-4-[(*tert*-Butyldimethylsilyloxy)but-2-en-1-yl] diethyl phosphate (2p)<sup>1</sup>**

**Copper (I) chloride (CuCl)** was purchased from Strem and used as received.

**(E)-Diethyl 3-(2-bromophenyl)prop-2-enyl phosphate (2d)<sup>2</sup>**

**(E)-Diethyl 3-(3-bromophenyl)prop-2-enyl phosphate (2e)<sup>3</sup>**

**(E)-Diethyl 3-(4-chlorophenyl)prop-2-enyl phosphate (2f)<sup>3</sup>**

**(E)-Diethyl 3-cyclohexylprop-2-enyl phosphate (2m)<sup>3</sup>**

**(E)-Diethyl 3-(2-fluorophenyl)prop-2-enyl phosphate (2c)<sup>2</sup>**

**(E)-Diethyl 3-(2-methoxyphenyl)prop-2-enyl phosphate (2b)<sup>3</sup>**

**(E)-Diethyl 3-(4-nitrophenyl)prop-2-enyl phosphate (2h)<sup>4</sup>**

**(E)-Diethyl 3-phenylprop-2-enyl phosphate (2a)<sup>4</sup>**

**(E)-Diethyl 3-(pyridin-3-yl)allyl phosphate (2k)<sup>5</sup>**

**(E)-Diethyl 3-(thiophen-3-yl)allyl phosphate (2l)<sup>5</sup>**

**(E)-Diethyl 3-(4-trifluoromethylphenyl)prop-2-enyl phosphate (2g)<sup>2</sup>**

**(E)-3-[Dimethyl(phenyl)silyl]prop-2-enyl diethyl phosphate (2o)<sup>2</sup>**

**Imidazolinium salts 8,9** were prepared according to previously reported procedures.<sup>6</sup>

**(1E,5E)-1-Iodo-2,6,10-trimethylundeca-1,5,9-triene (14)** was prepared according to previously reported procedures.<sup>7</sup>

**Lithium methoxide (LiOMe)** was purchased from Aldrich and used as received.

**Methanol** was purchased from Acros and purified by distillation from Na (Aldrich) prior to use.

**Methyl (E)-4-(3-((diethoxyphosphoryl)oxy)prop-1-en-1-yl)benzoate (2j)<sup>5</sup>**

**NHC–Ag complex 11a and 11b** were prepared according to a previously reported procedure.<sup>8</sup>

**Palladium (II) Acetate (Pd(OAc)<sub>2</sub>)** was purchased from Strem and used as received.

**Potassium *t*-butoxide (KO*t*-Bu)** was purchased from Strem and used as received.

**Potassium methoxide (KOMe)** was purchased from Aldrich and used as received.

**Pyrrolidine** was purchased from Aldrich and used as received.

[1] L. B. Delves, D. J. Vyas, M. Oestreich, *Angew. Chem. Int. Ed.* **2013**, *52*, 4650–4653.

[2] B. Jung, A. H. Hoveyda, *J. Am. Chem. Soc.* **2012**, *134*, 1490–1493.

[3] K. Akiyama, F. Gao, A. H. Hoveyda, *Angew. Chem. Int. Ed.* **2010**, *49*, 419–423.

[4] C. A. Luchaco-Cullis, H. Mizutani, K. E. Murphy, A. H. Hoveyda, *Angew. Chem. Int. Ed. Engl.* **2001**, *40*, 1456–1460.

[5] Y. Shi, B. Jung, S. Torker, A. H. Hoveyda, *J. Am. Chem. Soc.* **2015**, *127*, 6877–6882.

[6] a) J. J. Van Veldhuizen, J. E. Campbell, R. E. Guidici, A. H. Hoveyda, *J. Am. Chem. Soc.* **2005**, *127*, 6877–6882;  
b) K.-s. Lee, A. H. Hoveyda, *J. Org. Chem.* **2009**, *74*, 4455–4462.

[7] R. S. Sulake, H.-H. Lin, C.-Y. Hsu, C.-F. Weng, C. Chen, *J. Org. Chem.* **2015**, *80*, 6044–6051.

[8] T. L. May, M. K. Brown, A. H. Hoveyda, *Angew. Chem. Int. Ed.* **2008**, *47*, 7358–7362.

**Ruthenium complex (17)** was purchased from Aldrich and used as received.

**Sodium perborate tetrahydrate (NaBO<sub>3</sub>•4H<sub>2</sub>O)** was purchased from Aldrich and used as received.

**Sodium methoxide (NaOMe)** was purchased from Strem and used as received.

**Silver (I) Acetate (AgOAc)** was purchased from Aldrich and used as received.

**p-Toluenesulfonic acid (p-TsOH)** was purchased from Aldrich and used as received.

**Triethylamine (Et<sub>3</sub>N)** was purchased from Fisher Scientific, Inc. and distilled over CaH<sub>2</sub> prior to use.

**Tripotassium phosphate (K<sub>3</sub>PO<sub>4</sub>)** was purchased from Fisher Scientific, Inc. and distilled over CaH<sub>2</sub> prior to use.

### 3 Characterization Data for Allylic Phosphates Not Previously Reported

**Scheme S1.** Preparation of Allylic Phosphate **2i**

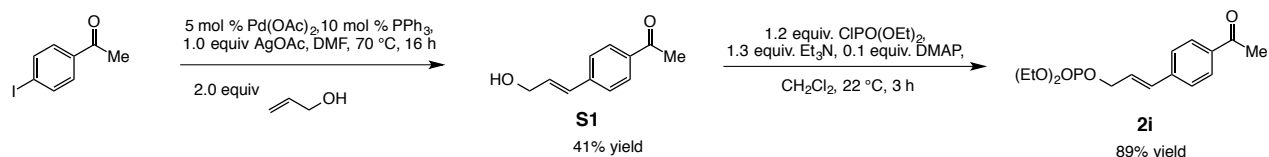

**(E)-3-(4-Acetylphenyl)allyl diethyl phosphate (2i): IR (neat):** 2985 (w), 2932 (w), 1681 (s), 1603 (m), 1563 (w), 1360 (w), 1266 (s), 1182 (w), 1166 (w), 1101 (w), 1028 (s), 975 (s), 853 (w), 801 (w), 594 (w) cm<sup>-1</sup>; **<sup>1</sup>H NMR (CDCl<sub>3</sub>, 600 MHz):** δ 7.90 (2H, d, *J* = 8.4 Hz), 7.45 (2H, d, *J* = 8.4 Hz), 6.70 (1H, d, *J* = 15.6 Hz), 6.40 (1H, dt, *J* = 15.6, 6.0 Hz), 4.70 (2H, t, *J* = 8.4 Hz), 4.15–4.10 (4H, m), 2.57 (3H, s), 1.33 (6H, t, *J* = 7.2 Hz); **<sup>13</sup>C NMR (CDCl<sub>3</sub>, 150 MHz):** δ 197.5, 140.7, 136.6, 132.3, 128.9, 126.8, 126.6 (d, *J*<sub>CP</sub> = 6.9 Hz), 67.5 (d, *J*<sub>CP</sub> = 4.7 Hz), 64.0 (d, *J*<sub>CP</sub> = 5.7 Hz), 26.7, 16.2 (d, *J*<sub>CP</sub> = 6.9 Hz). HRMS (ESI<sup>+</sup>): Calcd for C<sub>15</sub>H<sub>22</sub>O<sub>5</sub>P<sub>1</sub> [M+H]<sup>+</sup>: 313.1205; Found: 313.1217.

### 4 Representative Procedure for NHC–Cu-Catalyzed Enantioselective Methylene-Boryl Addition to Disubstituted Allylic Phosphates

An oven-dried 1-dram vial equipped with a stir bar was charged with imidazolium salt **10b** (4.8 mg, 5.5 μmol), NaOMe (6.5 mg, 150 μmol), and CuCl (0.5 mg, 5.0 μmol) in a nitrogen-filled glove box. The vial was sealed with a cap (phenolic open top cap with a red PFTE/white silicon septum) and electrical tape, and removed from the glove box. Tetrahydrofuran (thf; 0.50 mL) was added and the mixture was allowed to stir for 2 h under N<sub>2</sub> at 22 °C (the mixture became bright-yellow solution). The mixture of allylic phosphate **2a** (28 mg, 0.10 mmol) and bis[(pinacolato)boryl]methane **1** (40 mg, 0.15 mmol) in thf (0.5 mL) was added to the mixture slowly through a syringe. The resulting mixture was allowed to stir at 22 °C for 18 h. The mixture was passed through a short plug of silica gel (4 cm x 1 cm) and eluted with Et<sub>2</sub>O. The organic layer was concentrated *in vacuo*, resulting in a yellow oily residue, which was diluted with thf



(0.5 ml) and water (0.5 ml), then  $\text{NaBO}_3 \cdot 4\text{H}_2\text{O}$  (78mg, 0.3 mmol) was added and the mixture was allowed to stir at 22 °C for 3 h. The mixture was washed with  $\text{Et}_2\text{O}$  (1.0 ml) three times and the combined organic layers was passed through a short plug of  $\text{MgSO}_4$ , concentrated and purified by silica gel chromatography (6:1 hexanes/ $\text{Et}_2\text{O}$ ,  $R_f = 0.18$ ) to afford 12.3 mg of the desired product **3a** as colorless oil (0.083 mmol, 83% yield).

## 5 Characterization Data for Alcohols with a Tertiary Carbon Stereogenic Center

**(R)-2-Phenylbut-3-en-1-ol (3a).** IR (neat): 3353 (br, s), 2925 (w), 2873 (w), 1637 (w), 1601 (w), 1493 (w), 1452 (w), 1051 (m), 1027 (m), 916 (m), 755 (m), 698 (s), 679 (m), 593 (w), 537 (m)  $\text{cm}^{-1}$ ;  $^1\text{H}$  NMR ( $\text{CDCl}_3$ , 400 MHz):  $\delta$  7.35–7.31 (2H, m), 7.26–7.22 (3H, m), 6.00 (1H, ddd,  $J = 18.0, 10.4, 8.0$  Hz), 5.22–5.15 (2H, m), 3.82 (1H, d,  $J = 6.8$  Hz), 3.81 (1H, d,  $J = 6.8$  Hz), 3.52 (1H, q,  $J = 7.2$  Hz), 1.54 (1H, s);  $^{13}\text{C}$  NMR ( $\text{CDCl}_3$ , 100 MHz):  $\delta$  140.7, 138.3, 128.9, 128.1, 127.1, 117.3, 66.2, 52.7. HRMS (ESI<sup>+</sup>): Calcd for  $\text{C}_{10}\text{H}_{11}$  [ $\text{M}+\text{H}-\text{H}_2\text{O}$ ]<sup>+</sup>: 131.0854; Found: 131.0861. Specific rotation:  $[\alpha]_D^{20.0} -36.0$  ( $c$  0.25,  $\text{CHCl}_3$ ) for an enantiomerically enriched sample of 97:3 e.r. Based on reported optical rotation value ( $[\alpha]_D^{26} +19$  ( $c$  0.81,  $\text{CHCl}_3$ ) for 33:67 er), the absolute stereochemistry of the major enantiomer is assigned to be *R*.<sup>9</sup>

Enantiomeric purity was determined by HPLC analysis in comparison with authentic racemic material; Chiralpak AZ–H column, 99.5:0.5 hexanes/*i*PrOH, 0.5 mL/min, 220 nm.

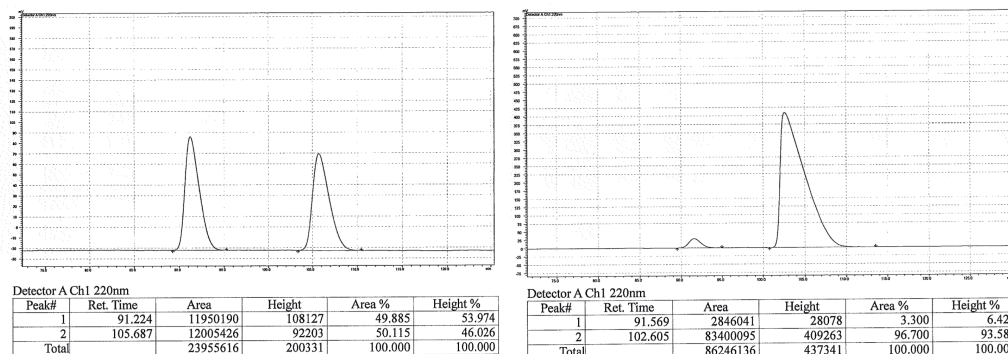

| Retention Time | Area      | Area%  | Retention Time | Area     | Area%  |
|----------------|-----------|--------|----------------|----------|--------|
| 91.224         | 11050190  | 49.885 | 91.569         | 2846041  | 3.300  |
| 105.687        | 120005426 | 50.115 | 102.605        | 83400095 | 96.700 |

**(R)-2-(2-Methoxyphenyl)but-3-en-1-ol (3b):** IR (neat): 3379 (br, s), 2937 (w), 2836 (w), 1636 (w), 1597 (w), 1585 (w), 1491 (s), 1462 (m), 1438 (m), 1288 (w), 1240 (w), 1187 (w), 1168 (w), 1109 (w), 1051 (s), 1026 (s), 996 (m), 915 (m), 751 (s), 670 (m)  $\text{cm}^{-1}$ ;  $^1\text{H}$  NMR ( $\text{CDCl}_3$ , 400 MHz):  $\delta$  7.26–7.21 (1H, m), 7.20 (1H, m), 6.94 (1H, t,  $J = 7.6$  Hz), 6.89 (1H, d,  $J = 8.4$  Hz), 6.12–6.03 (1H, m), 5.22–5.17 (2H, m), 3.87 (1H, q,  $J = 7.2$  Hz), 3.86–3.80 (5H, m), 1.61 (1H, s);  $^{13}\text{C}$  NMR ( $\text{CDCl}_3$ , 100 MHz):  $\delta$  157.3, 138.0, 129.0, 128.5, 128.0, 120.9, 117.0, 111.0, 65.3, 55.6.

45.9. **HRMS (ESI<sup>+</sup>):** Calcd for C<sub>11</sub>H<sub>13</sub>O<sub>1</sub> [M+H-H<sub>2</sub>O]<sup>+</sup>: 161.0966; Found: 161.0968. Specific rotation:  $[\alpha]_D^{20.0}$  -25.2 (*c* 0.85, CHCl<sub>3</sub>) for an enantiomerically enriched sample of 99:1 e.r.

Enantiomeric purity was determined by HPLC analysis in comparison with authentic racemic material; Chiralpak AZ-H column, 99.0:1.0 hexanes/*i*PrOH, 0.5 mL/min, 220 nm.

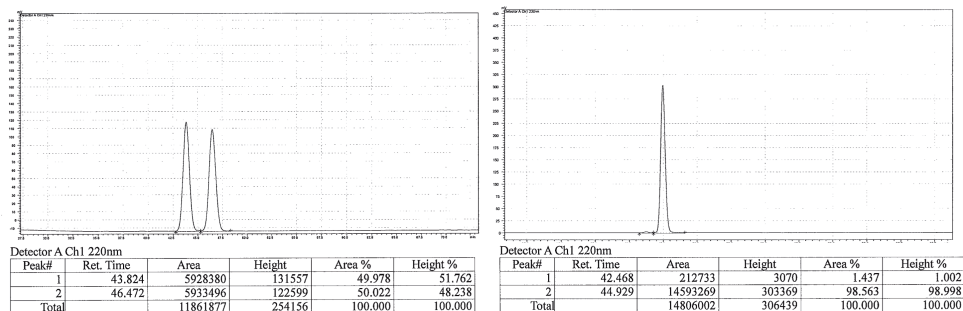

| Retention Time | Area    | Area%  | Retention Time | Area     | Area%  |
|----------------|---------|--------|----------------|----------|--------|
| 43.824         | 5928380 | 49.978 | 42.468         | 212733   | 1.437  |
| 46.472         | 5933496 | 50.022 | 44.929         | 14593269 | 98.563 |

**(R)-2-(2-Fluorophenyl)but-3-en-1-ol (3c): IR (neat):** 3358 (br, s), 2938 (w), 1638 (w), 1583 (w), 1490 (s), 1454 (m), 1418 (w), 1228 (s), 1175 (w), 1055 (s), 1036 (s), 993 (m), 919 (s), 824 (w), 806 (w), 665 (w), 602 (w), 479 (w) cm<sup>-1</sup>; **<sup>1</sup>H NMR (CDCl<sub>3</sub>, 400 MHz):** δ 7.27–7.20 (2H, m), 7.14–7.10 (1H, m), 7.07–7.03 (1H, m), 6.08–6.00 (1H, m), 5.23 (1H, d, *J* = 10.8 Hz), 5.13 (1H, *J* = 17.2 Hz), 3.86 (3H, app.s), 1.58 (1H, s); **<sup>13</sup>C NMR (CDCl<sub>3</sub>, 100 MHz):** δ 161.0 (d, *J*<sub>CF</sub> = 244.4 Hz), 137.0, 129.3 (d, *J*<sub>CF</sub> = 4.5 Hz), 128.5 (d, *J*<sub>CF</sub> = 8.4 Hz), 127.7 (d, *J*<sub>CF</sub> = 15.2 Hz), 124.4 (d, *J*<sub>CF</sub> = 3.0 Hz), 117.8, 115.9 (d, *J*<sub>CF</sub> = 22.0 Hz), 65.1, 46.2. **HRMS (ESI<sup>+</sup>):** Calcd for C<sub>10</sub>H<sub>10</sub>F [M+H-H<sub>2</sub>O]<sup>+</sup>: 149.0767; Found: 149.0773. Specific rotation:  $[\alpha]_D^{20.0}$  -34.2 (*c* 0.89, CHCl<sub>3</sub>) for an enantiomerically enriched sample of 98:2 e.r.

Enantiomeric purity was determined by HPLC analysis in comparison with authentic racemic material; Chiralpak AZ-H column, 99.0:1.0 hexanes/*i*PrOH, 0.5 mL/min, 220 nm

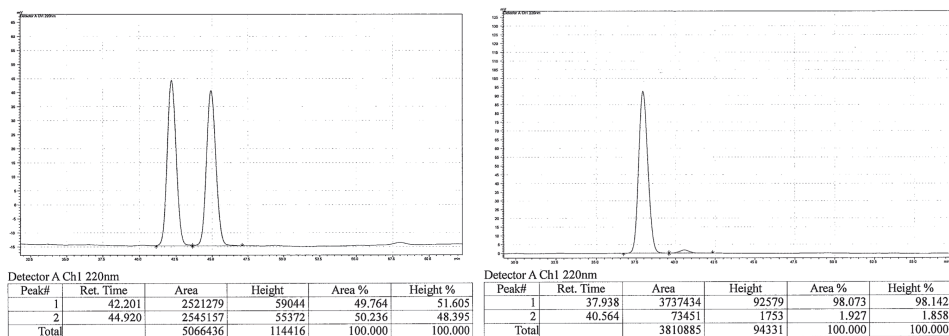

| Retention Time | Area    | Area%  | Retention Time | Area    | Area%  |
|----------------|---------|--------|----------------|---------|--------|
| 42.201         | 2521279 | 49.764 | 37.938         | 3737434 | 98.073 |
| 44.920         | 2545157 | 50.236 | 40.564         | 73451   | 1.927  |

**(R)-2-(2-Bromophenyl)but-3-en-1-ol (3d): IR (neat):** 3353 (br, s), 3080 (w), 2928 (w), 2874 (w), 1730 (w), 1637 (w), 1469 (m), 1437 (w), 1417 (w), 1373 (w), 1222 (w), 1021 (s), 992 (s), 918 (s), 832 (w), 750 (s), 724 (m), 646 (m), 600 (w)  $\text{cm}^{-1}$ ;  **$^1\text{H NMR}$  ( $\text{CDCl}_3$ , 400 MHz):**  $\delta$  7.59 (1H,  $J = 8.0$  Hz), 7.32–7.28 (2H, m), 7.13–7.08 (1H, m), 5.99 (1H, ddd,  $J = 17.6, 10.0, 6.8$  Hz), 5.27 (1H, dd,  $J = 10.4$  Hz), 5.23 (1H, d,  $J = 17.6$  Hz), 4.11 (1H,  $J = 6.8$  Hz), 3.91–3.87 (2H, m), 1.56 (1H, s);  **$^{13}\text{C NMR}$  ( $\text{CDCl}_3$ , 100 MHz):**  $\delta$  139.8, 137.1, 133.4, 128.9, 128.5, 127.8, 125.3, 118.0, 65.1, 50.7. **HRMS (ESI $^+$ ):** Calcd for  $\text{C}_{10}\text{H}_{10}\text{Br}$   $[\text{M}+\text{H}-\text{H}_2\text{O}]^+$ : 208.9966; Found: 208.9964. Specific rotation:  $[\alpha]_{\text{D}}^{20.0} -11.9$  ( $c$  1.33,  $\text{CHCl}_3$ ) for an enantiomerically enriched sample of 97:3 er.

Enantiomeric purity was determined by HPLC analysis in comparison with authentic racemic material; Chiralpak AZ–H column, 99.0:1.0 hexanes/*i*PrOH, 0.5 mL/min, 220 nm.

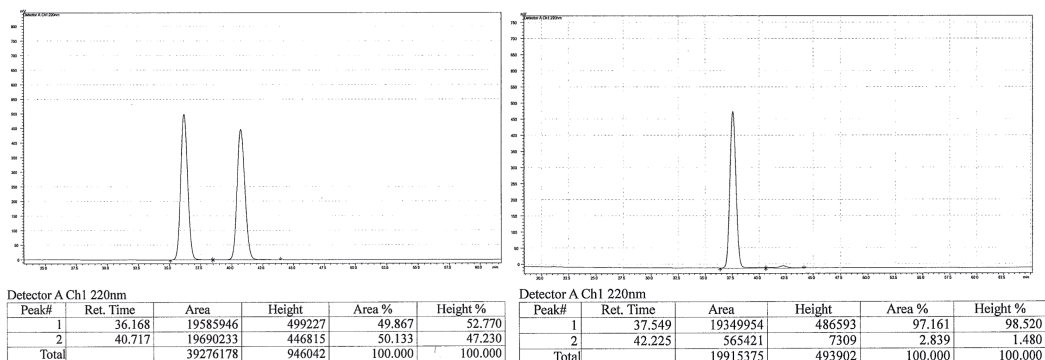

| Retention Time | Area     | Area%  | Retention Time | Area     | Area%  |
|----------------|----------|--------|----------------|----------|--------|
| 36.168         | 19585946 | 49.867 | 37.549         | 19349954 | 97.161 |
| 40.717         | 19690233 | 50.133 | 42.225         | 565421   | 2.839  |

**(R)-2-(3-Bromophenyl)but-3-en-1-ol (3e): IR (neat):** 3333 (br, s), 2925 (w), 2874 (w), 1638 (w), 1593 (m), 1566 (m), 1474 (m), 1426 (m), 1299 (w), 1187 (w), 1127 (w), 1071 (s), 1053 (s), 1027 (s), 996 (s), 919 (s), 878 (m), 836 (w), 804 (w), 779 (s), 693 (s), 656 (m), 435 (m)  $\text{cm}^{-1}$ ;  **$^1\text{H NMR}$  ( $\text{CDCl}_3$ , 400 MHz):**  $\delta$  7.39–7.37 (2H, m), 7.23–7.16 (2H, m), 5.96 (1H, ddd,  $J = 17.2, 9.6, 6.8$  Hz), 5.24 (1H, d,  $J = 9.6$  Hz), 5.19 (1H, d,  $J = 16.8$  Hz), 3.82 (2H, app. d,  $J = 7.2$  Hz), 3.50 (1H, app. q,  $J = 7.2$  Hz), 1.56 (1H, s);  **$^{13}\text{C NMR}$  ( $\text{CDCl}_3$ , 100 MHz):**  $\delta$  143.2, 137.6, 131.2, 130.4, 130.2, 126.8, 122.9, 117.8, 66.0, 52.2. **HRMS (ESI $^+$ ):** Calcd for  $\text{C}_{10}\text{H}_{10}\text{Br}$   $[\text{M}+\text{H}-\text{H}_2\text{O}]^+$ : 208.9966; Found: 208.9957. Specific rotation:  $[\alpha]_{\text{D}}^{20.0} -39.5$  ( $c$  1.32,  $\text{CHCl}_3$ ) for an enantiomerically enriched sample of 97:3 e.r.

Enantiomeric purity was determined by HPLC analysis in comparison with authentic racemic material; Chiralpak AZ–H column, 99.0:1.0 hexanes/*i*PrOH, 0.5 mL/min, 220 nm.

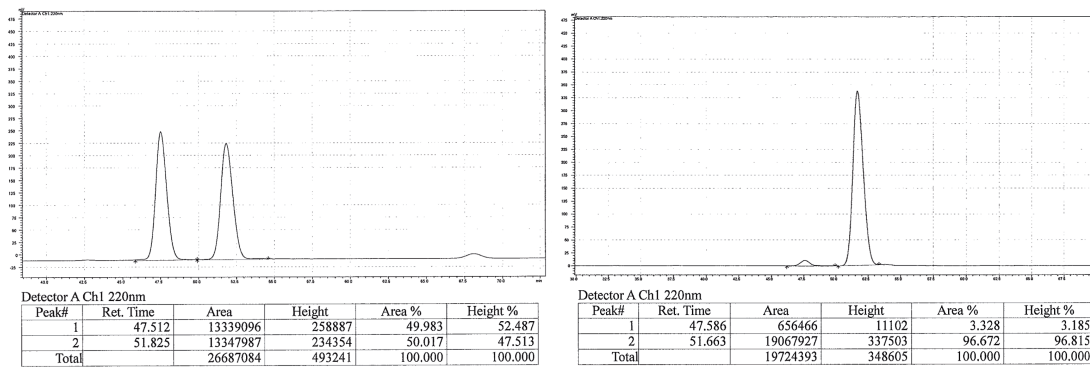

| Retention Time | Area     | Area%  | Retention Time | Area     | Area%  |
|----------------|----------|--------|----------------|----------|--------|
| 47.512         | 13339096 | 49.983 | 47.586         | 656466   | 3.328  |
| 51.825         | 13347987 | 50.017 | 51.663         | 19067927 | 96.672 |

**(R)-2-(4-Chlorophenyl)but-3-en-1-ol (3f): IR (neat):** 3345 (br, s), 2926 (w), 2876 (w), 1637 (w), 1490 (s), 1406 (m), 1297 (w), 1181 (w), 1091 (s), 1053 (s), 1030 (s), 1014 (s), 993 (s), 919 (s), 870 (w), 824 (w), 784 (m), 723 (m), 625 (m), 540 (s), 521 (s), 457 (w)  $\text{cm}^{-1}$ ;  **$^1\text{H}$  NMR ( $\text{CDCl}_3$ , 400 MHz):**  $\delta$  7.33–7.29 (2H, m), 7.19–7.16 (2H, m), 5.97 (1H, ddd,  $J = 17.6, 10.0, 7.2$  Hz), 5.23 (1H, app. dt,  $J = 10.4, 1.2$  Hz), 5.17 (1H, app. dt,  $J = 17.2, 1.2$  Hz), 3.81 (2H, app. d,  $J = 7.2$  Hz), 3.51 (1H, app. q,  $J = 7.2$  Hz), 1.50 (1H, s);  **$^{13}\text{C}$  NMR ( $\text{CDCl}_3$ , 100 MHz):**  $\delta$  139.3, 137.8, 132.8, 129.5, 129.0, 117.6, 66.0, 51.9. HRMS (ESI<sup>+</sup>): Calcd for  $\text{C}_{10}\text{H}_{10}\text{Cl}$  [ $\text{M}+\text{H}-\text{H}_2\text{O}$ ]<sup>+</sup>: 165.0471; Found: 165.0470. Specific rotation:  $[\alpha]_{\text{D}}^{20.0} -49.5$  ( $c$  0.58,  $\text{CHCl}_3$ ) for an enantiomerically enriched sample of 97:3 e.r.

Enantiomeric purity was determined by HPLC analysis in comparison with authentic racemic material; Chiralpak AZ–H column, 99.0:1.0 hexanes/*i*PrOH, 0.5 mL/min, 220 nm.

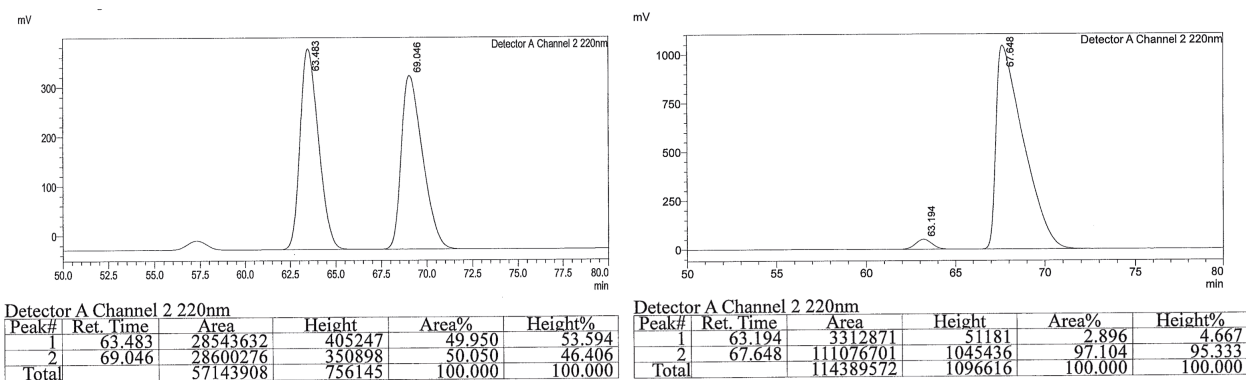

| Retention Time | Area     | Area%  | Retention Time | Area      | Area%  |
|----------------|----------|--------|----------------|-----------|--------|
| 63.483         | 28543632 | 49.950 | 63.194         | 3312871   | 2.896  |
| 69.046         | 28600276 | 50.050 | 67.648         | 111076701 | 97.104 |

**(R)-2-(4-(Trifluoromethyl)phenyl)but-3-en-1-ol (3g): IR (neat):** 3344 (br, s), 2923 (m), 2853 (w), 1731 (w), 1619 (w), 1554 (w), 14612 (w), 1377 (w), 1325 (s), 1261 (w), 1164 (m), 1124 (s), 1068 (s), 1018 (m), 922 (w), 839 (w), 738 (w), 605 (w)  $\text{cm}^{-1}$ ;  **$^1\text{H}$  NMR ( $\text{CDCl}_3$ , 400 MHz):**  $\delta$

7.60 (2H, d,  $J = 8.0$  Hz), 7.37 (2H, d,  $J = 8.0$  Hz), 6.00 (1H, ddd,  $J = 17.6, 10.0, 7.2$  Hz), 5.26 (1H, d,  $J = 10.0$  Hz), 5.20 (1H, dd,  $J = 17.2, 0.8$  Hz), 3.86 (2H, d,  $J = 7.2$  Hz), 3.60 (1H, app. q,  $J = 7.2$  Hz), 1.57 (1H, s);  $^{13}\text{C}$  NMR ( $\text{CDCl}_3$ , 100 MHz): 145.0, 137.4, 129.4 (q,  $J_{\text{CF}} = 31.9$  Hz), 128.5, 125.8 (q,  $J_{\text{CF}} = 3.8$  Hz), 124.3 (q,  $J_{\text{CF}} = 270.2$  Hz), 118.0, 65.9, 52.4. HRMS (ESI<sup>+</sup>): Calcd for  $\text{C}_{11}\text{H}_{10}\text{F}_3$  [M+H-H<sub>2</sub>O]<sup>+</sup>: 199.0735; Found: 199.0737. Specific rotation:  $[\alpha]_{\text{D}}^{20.0}$  11.7 (c 1.09,  $\text{CHCl}_3$ ) for an enantiomerically enriched sample of 97:3 er.

Enantiomeric purity was determined by HPLC analysis in comparison with authentic racemic material; Chiralpak AZ-H column, 99.0:1.0 hexanes/*i*PrOH, 0.5 mL/min, 220 nm.

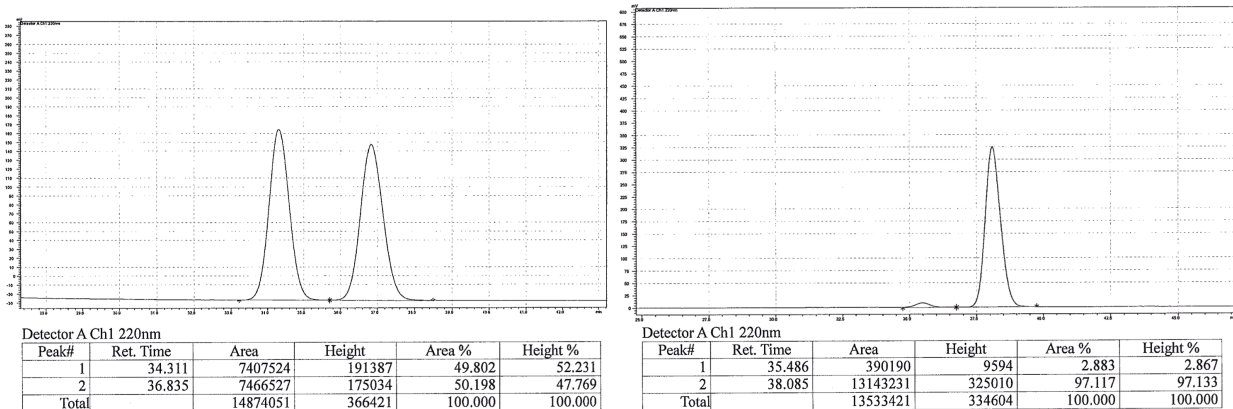

| Retention Time | Area    | Area%  | Retention Time | Area     | Area%  |
|----------------|---------|--------|----------------|----------|--------|
| 34.311         | 7407524 | 49.802 | 35.486         | 390190   | 2.883  |
| 36.835         | 7466527 | 50.198 | 38.085         | 13143231 | 97.117 |

**(R)-2-(4-Nitrophenyl)but-3-en-1-ol (3h):** IR (neat): 3374 (br, s), 2927 (w), 2877 (w), 1638 (w), 1597 (m), 1514 (s), 1411 (w), 1342 (s), 1182 (w), 1109 (w), 1052 (m), 1014 (m), 994 (m), 923 (m), 850 (s), 827 (m), 779 (w), 751 (m), 702 (s), 535 (w)  $\text{cm}^{-1}$ ;  $^1\text{H}$  NMR ( $\text{CDCl}_3$ , 400 MHz):  $\delta$  8.18 (2H, d,  $J = 8.8$  Hz), 7.42 (2H, d,  $J = 8.8$  Hz), 5.99 (1H, ddd,  $J = 17.6, 10.0, 7.2$  Hz), 5.28 (1H, d,  $J = 10.4$  Hz), 5.20 (1H, d,  $J = 17.2$  Hz), 3.88 (2H, d,  $J = 7.6$  Hz), 3.65 (1H, app. q,  $J = 7.2$  Hz), 1.86 (1H, br);  $^{13}\text{C}$  NMR ( $\text{CDCl}_3$ , 100 MHz):  $\delta$  148.7, 147.1, 136.8, 129.1, 124.0, 118.5, 65.7, 52.3. HRMS (ESI<sup>+</sup>): Calcd for  $\text{C}_{10}\text{H}_{12}\text{O}_3\text{N}$  [M+H]<sup>+</sup>: 194.0817; Found: 194.0811. Specific rotation:  $[\alpha]_{\text{D}}^{20.0}$  -62.8 (c 0.78,  $\text{CHCl}_3$ ) for an enantiomerically enriched sample of 97:3 er.

Enantiomeric purity was determined by HPLC analysis in comparison with authentic racemic material; Chiralpak AZ-H column, 96.0:4.0 hexanes/*i*PrOH, 0.5 mL/min, 220 nm.

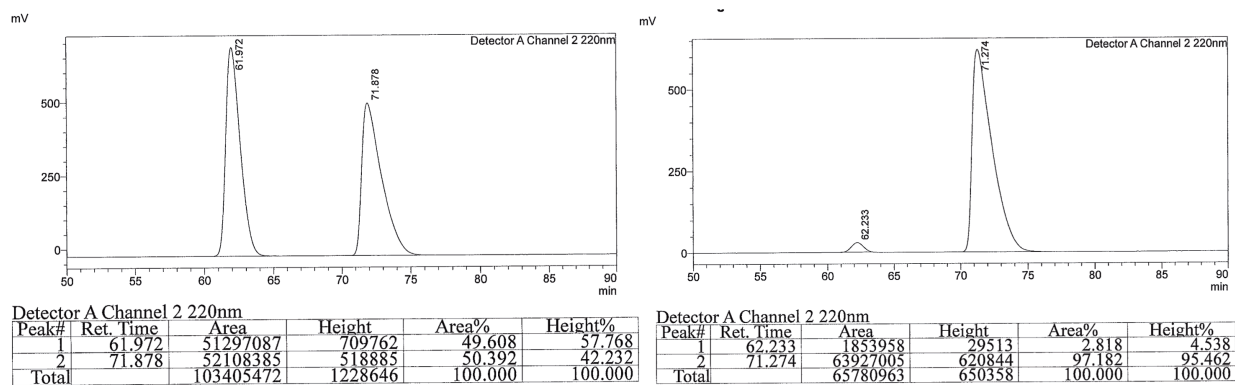

| Retention Time | Area     | Area%  | Retention Time | Area     | Area%  |
|----------------|----------|--------|----------------|----------|--------|
| 61.972         | 51297087 | 49.608 | 62.233         | 1853958  | 2.818  |
| 71.878         | 52108385 | 50.392 | 71.274         | 63927005 | 97.182 |

**(R)-1-(4-(1-Hydroxybut-3-en-2-yl)phenyl)ethan-1-one (3i):** IR (neat): 3423 (br, s), 2924 (m), 2827 (w), 1679 (s), 1605 (s), 1459 (w), 1411 (m), 1359 (m), 1307 (w), 1270 (s), 1184 (w), 1115 (w), 1056 (m), 1017 (m), 996 (w), 959 (w), 835 (w)  $\text{cm}^{-1}$ ;  $^1\text{H NMR}$  ( $\text{CDCl}_3$ , 400 MHz):  $\delta$  7.94–7.91 (2H, m), 7.35–7.33 (2H, m), 6.00 (1H, ddd,  $J = 17.6, 10.0, 7.2$  Hz), 5.25 (1H, d,  $J = 10.4$  Hz), 5.20 (1H, d,  $J = 17.6$  Hz), 3.86 (2H, d,  $J = 5.2$  Hz), 3.61 (1H, q,  $J = 7.2$  Hz), 2.59 (3H, s), 1.59 (1H, s);  $^{13}\text{C NMR}$  ( $\text{CDCl}_3$ , 100 MHz):  $\delta$  197.9, 146.5, 137.5, 136.0, 128.9, 128.4, 118.0, 65.9, 52.6, 26.7. HRMS (ESI $^+$ ): Calcd for  $\text{C}_{12}\text{H}_{15}\text{O}_2$   $[\text{M}+\text{H}]^+$ : 191.1072; Found: 191.1073. Specific rotation:  $[\alpha]_D^{20.0} -55.6$  ( $c$  0.73,  $\text{CHCl}_3$ ) for an enantiomerically enriched sample of 97:3 e.r.

Enantiomeric purity was determined by HPLC analysis in comparison with authentic racemic material; Chiralpak AZ–H column, 96.0:4.0 hexanes/*i*PrOH, 0.5 mL/min, 254 nm.

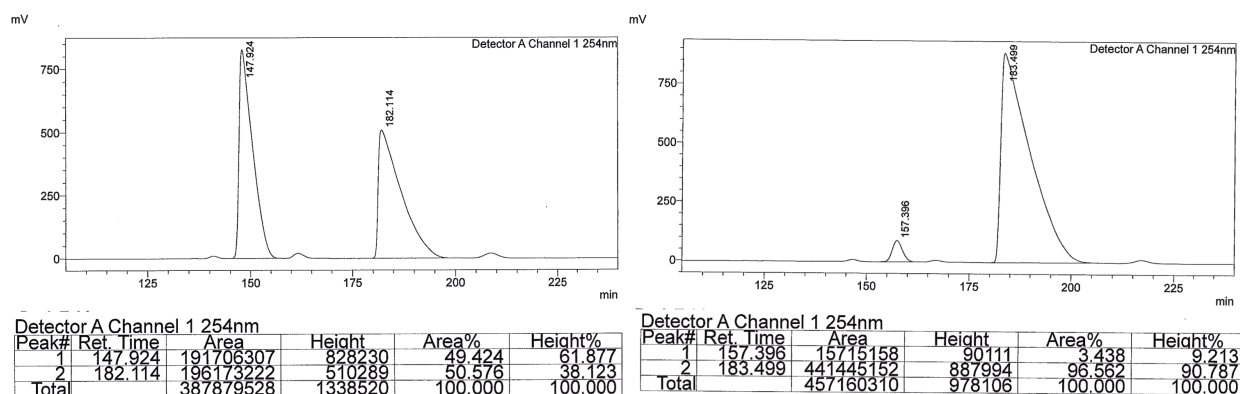

| Retention Time | Area      | Area%  | Retention Time | Area      | Area%  |
|----------------|-----------|--------|----------------|-----------|--------|
| 147.924        | 191706307 | 49.424 | 157.396        | 15715158  | 3.438  |
| 182.114        | 196173222 | 50.576 | 183.499        | 441445152 | 96.562 |

**Methyl (R)-4-(1-hydroxybut-3-en-2-yl)benzoate (3j):** IR (neat): 3419 (br, s), 2951 (w), 2878 (w), 1718 (s), 1637 (w), 1609 (m), 1574 (w), 1436 (m), 1413 (w), 1312 (m), 1277 (s), 1181 (m), 1110 (s), 1054 (m), 1019 (m), 996 (w), 966 (w), 920 (w), 769 (m), 709 (m)  $\text{cm}^{-1}$ ;  $^1\text{H NMR}$



(CDCl<sub>3</sub>, 600 MHz):  $\delta$  8.01 (2H,  $J$  = 8.4 Hz), 7.32 (2H,  $J$  = 8.4 Hz), 6.00 (1H, ddd,  $J$  = 17.4, 9.6, 7.2 Hz), 5.25 (1H, app. d,  $J$  = 10.2 Hz), 5.20 (1H, app. d,  $J$  = 18.0 Hz), 3.91 (3H, s), 3.85 (2H, d,  $J$  = 6.6 Hz), 3.60 (1H, q,  $J$  = 7.2 Hz), 1.52 (1H, s); <sup>13</sup>C NMR (CDCl<sub>3</sub>, 100 MHz):  $\delta$  167.1, 146.2, 137.6, 130.2, 129.0, 128.2, 117.9, 66.0, 52.6, 52.2. HRMS (ESI<sup>+</sup>): Calcd for C<sub>12</sub>H<sub>15</sub>O<sub>3</sub> [M+H]<sup>+</sup>: 207.1021; Found: 207.1025. Specific rotation:  $[\alpha]_D^{20.0}$  -51.7 ( $c$  1.05, CHCl<sub>3</sub>) for an enantiomerically enriched sample of 97:3 e.r.

Enantiomeric purity was determined by HPLC analysis in comparison with authentic racemic material; Chiralpak AZ-H column, 96.0:4.0 hexanes/ *i*PrOH, 0.5 mL/min, 254 nm.

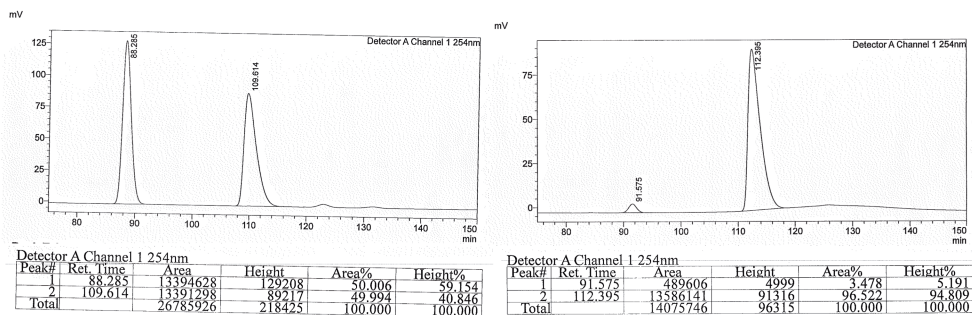

| Retention Time | Area     | Area%  | Retention Time | Area     | Area%  |
|----------------|----------|--------|----------------|----------|--------|
| 88.285         | 13394628 | 50.006 | 91.575         | 489606   | 3.478  |
| 109.614        | 13391298 | 49.994 | 112.395        | 13586141 | 96.522 |

(*R*)-2-(Pyridin-3-yl)but-3-en-1-ol (**3k**): IR (neat): 3222 (br, s), 3081 (w), 2922 (w), 2868 (w), 1638 (w), 1592 (w), 1479 (m), 1425 (m), 1369 (w), 1060 (s), 1028 (s), 994 (m), 918 (s), 810 (m), 785 (m), 713 (s), 633 (m), 400 (m) cm<sup>-1</sup>; <sup>1</sup>H NMR (CDCl<sub>3</sub>, 600 MHz):  $\delta$  8.49–8.47 (2H, m), 7.57 (1H, dt,  $J$  = 7.8, 1.8 Hz), 7.27–7.25 (1H, m), 6.00 (1H, ddd,  $J$  = 18.0, 10.2, 7.2 Hz), 5.26 (1H, td,  $J$  = 10.2, 1.2 Hz), 5.19 (1H, td,  $J$  = 17.4, 1.2 Hz), 3.87–3.86 (1H, m), 3.56 (1H, q,  $J$  = 7.2 Hz), 1.95 (1H, s); <sup>13</sup>C NMR (CDCl<sub>3</sub>, 100 MHz):  $\delta$  149.8, 148.2, 137.3, 136.7, 135.6, 123.7, 118.0, 65.8, 50.0. HRMS (ESI<sup>+</sup>): Calcd for C<sub>9</sub>H<sub>12</sub>NO [M+H]<sup>+</sup>: 150.0919; Found: 150.0921. Specific rotation:  $[\alpha]_D^{20.0}$  -20.6 ( $c$  0.67, CHCl<sub>3</sub>) for an enantiomerically enriched sample of 97:3 e.r.

Enantiomeric purity was determined by HPLC analysis in comparison with authentic racemic material before oxidation; Chiralpak AZ-H column, 98.0:2.0 hexanes/ *i*PrOH, 1.0 mL/min, 254 nm.

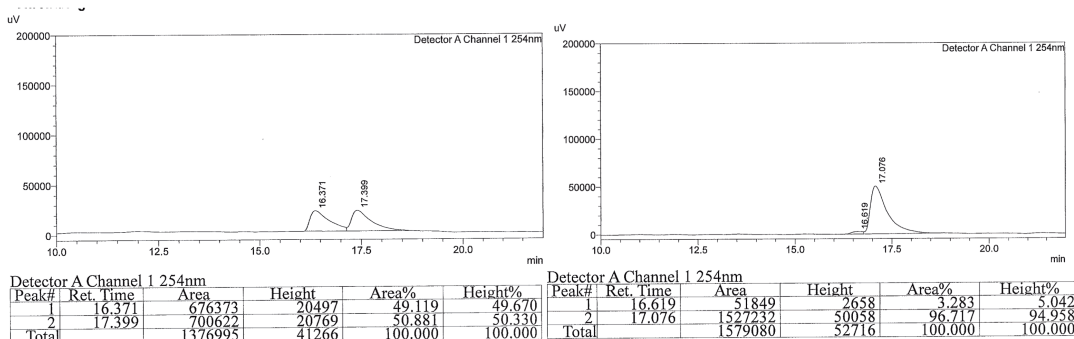

| Retention Time | Area   | Area%  | Retention Time | Area    | Area%  |
|----------------|--------|--------|----------------|---------|--------|
| 16.371         | 676373 | 49.119 | 16.619         | 51849   | 3.283  |
| 17.399         | 700622 | 50.881 | 17.076         | 1527232 | 96.717 |

**(R)-2-(Thiophen-3-yl)but-3-en-1-ol (3l): IR (neat):** 3392 (br, s), 2923 (s), 2853 (m), 1733 (w), 1639 (w), 1461 (m), 1414 (m), 1382 (m), 1259 (m), 1156 (m), 1079 (s), 1030 (s), 993 (s), 965 (m), 921 (s), 840 (m), 783 (s), 714 (m), 632 (m), 482 (w)  $\text{cm}^{-1}$ ;  **$^1\text{H}$  NMR ( $\text{CDCl}_3$ , 500 MHz):**  $\delta$  7.32 (1H, dd,  $J = 5.2, 3.2$  Hz), 7.08–7.07 (1H, m), 7.00 (1H, dd,  $J = 5.2, 1.2$  Hz), 5.97 (1H, ddd,  $J = 17.2, 10.0, 7.2$  Hz), 5.24–5.17 (2H, m), 3.86–3.76 (2H, m), 3.65 (1H, q,  $J = 7.2$  Hz), 1.57 (1H, s);  **$^{13}\text{C}$  NMR ( $\text{CDCl}_3$ , 100 MHz):**  $\delta$  141.2, 138.0, 127.2, 126.1, 121.3, 117.4, 65.9, 48.2. **HRMS (ESI<sup>+</sup>):** Calcd for  $\text{C}_8\text{H}_9\text{S}$   $[\text{M}+\text{H}-\text{H}_2\text{O}]^+$ : 137.0425; Found: 137.0420. Specific rotation:  $[\alpha]_{\text{D}}^{20.0} -13.6$  ( $c$  0.87,  $\text{CHCl}_3$ ) for an enantiomerically enriched sample of 94:6 e.r.

Enantiomeric purity was determined by HPLC analysis in comparison with authentic racemic material before oxidation; Chiralpak AZ–H column, 99.0:1.0 hexanes/*i*PrOH, 0.5 mL/min, 220 nm.

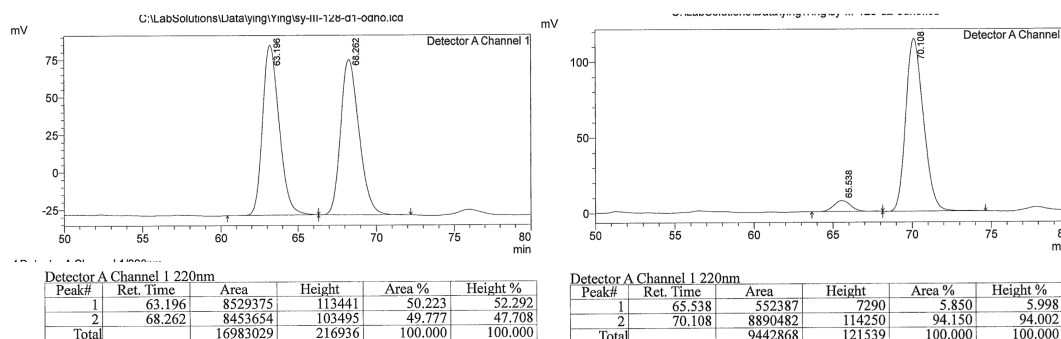

| Retention Time | Area    | Area%  | Retention Time | Area    | Area%  |
|----------------|---------|--------|----------------|---------|--------|
| 63.196         | 8529375 | 50.223 | 65.538         | 552387  | 5.850  |
| 68.262         | 8453654 | 49.777 | 70.108         | 8890482 | 94.150 |

**(R)-2-Cyclohexylbut-3-en-1-ol (3m): IR (neat):** 3358 (br, s), 2923 (s), 2852 (m), 1449 (w), 1055 (w), 1016 (w), 997 (w), 913 (w)  $\text{cm}^{-1}$ ;  **$^1\text{H}$  NMR ( $\text{CDCl}_3$ , 400 MHz):**  $\delta$  5.63 (1H, dt,  $J = 16.8, 10.0$  Hz), 5.19 (1H, dd,  $J = 10.4, 2.0$  Hz), 5.11 (1H, dd,  $J = 17.2, 2.0$  Hz), 3.70 (1H, dd,  $J = 10.4, 4.8$  Hz), 3.44 (1H, dd,  $J = 10.4, 9.2$  Hz), 2.07–2.00 (1H, m), 1.73–1.62 (5H, m), 1.43 (1H, s), 1.37–1.31 (1H, m), 1.27–1.10 (3H, m), 1.07–0.93 (2H, m);  **$^{13}\text{C}$  NMR ( $\text{CDCl}_3$ , 100 MHz):**  $\delta$  138.9, 118.3, 63.6, 53.2, 38.7, 31.3, 30.4, 26.7, 26.6, 26.5. **HRMS (ESI<sup>+</sup>):** Calcd for  $\text{C}_{10}\text{H}_{19}\text{O}$   $[\text{M}+\text{H}]^+$ : 155.1426; Found: 155.1432. Specific rotation:  $[\alpha]_{\text{D}}^{20.0} -10.8$  ( $c$  0.65,  $\text{CHCl}_3$ ) for an enantiomerically enriched sample of 96:4 e.r.

Enantiomeric purity was determined by HPLC analysis in comparison with authentic racemic material after benzylation; Chiralpak AZ–H column, 99.0:1.0 hexanes/*i*PrOH, 1.0 mL/min, 220 nm.



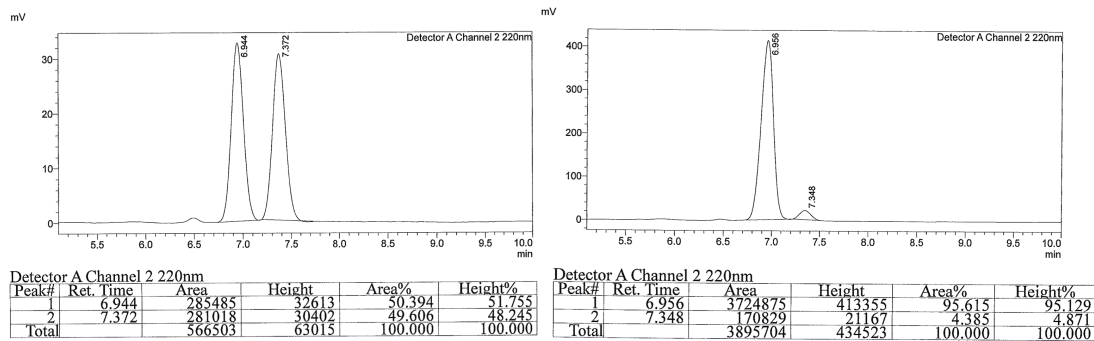

| Retention Time | Area   | Area%  | Retention Time | Area    | Area%  |
|----------------|--------|--------|----------------|---------|--------|
| 6.944          | 285485 | 50.394 | 6.956          | 3724875 | 95.615 |
| 7.372          | 282018 | 49.606 | 7.348          | 170829  | 4.385  |

**(R,E)-4-Phenyl-2-vinylbut-3-en-1-ol (3n): IR (neat):** 3349 (br, s), 3080 (w), 3059 (w), 3025 (w), 2926 (w), 2872 (w), 1637 (w), 1598 (w), 1493 (w), 1448 (w), 1415 (w), 1028 (m), 990 (m), 965 (s), 915 (s), 862 (w), 842 (w), 746 (s), 691 (s), 601 (w), 508 (w)  $\text{cm}^{-1}$ ;  **$^1\text{H}$  NMR ( $\text{CDCl}_3$ , 400 MHz):**  $\delta$  7.38 (2H, d,  $J = 7.2$  Hz), 7.31 (2H, app. t,  $J = 7.2$  Hz), 7.25–7.21 (1H, m), 6.51 (1H, d,  $J = 16.0$  Hz), 6.14 (1H, dd,  $J = 16.0, 8.0$  Hz), 5.89–5.80 (1H, m), 5.25–5.21 (2H, m), 3.66 (2H, d,  $J = 6.8$  Hz), 3.18–3.11 (1H, m), 1.59 (1H, s);  **$^{13}\text{C}$  NMR ( $\text{CDCl}_3$ , 100 MHz):**  $\delta$  137.5, 137.1, 132.4, 128.70, 128.68, 128.63, 126.4, 117.4, 65.4, 50.2. HRMS (ESI<sup>+</sup>): Calcd for  $\text{C}_{12}\text{H}_{13}$  [ $\text{M}+\text{H}-\text{H}_2\text{O}$ ]<sup>+</sup>: 157.1017; Found: 157.1014; specific rotation:  $[\alpha]_{\text{D}}^{20.0} -43.8$  ( $c$  0.84,  $\text{CHCl}_3$ ) for an enantiomerically enriched sample of 85:15 e.r.

Enantiomeric purity was determined by HPLC analysis in comparison with authentic racemic material; Chiralpak AZ–H column, 99.0:1.0 hexanes/*i*PrOH, 0.5 mL/min, 254 nm.

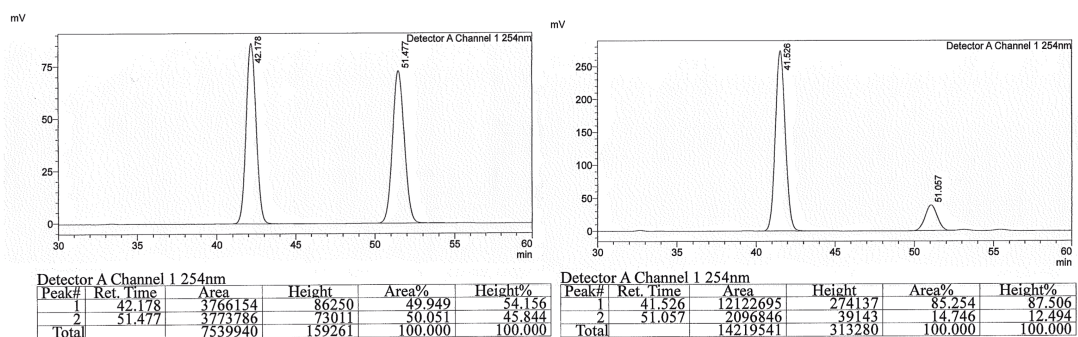

| Retention Time | Area    | Area%  | Retention Time | Area     | Area%  |
|----------------|---------|--------|----------------|----------|--------|
| 42.178         | 3766154 | 49.949 | 41.526         | 12122695 | 85.254 |
| 51.477         | 3773786 | 50.051 | 51.057         | 2096846  | 14.746 |

**(S)-2-(Dimethyl(phenyl)silyl)but-3-en-1-ol (3o): IR (neat):** 3347 (br, s), 2956 (w), 2868 (w), 1627 (w), 1427 (w), 1412 (w), 1301 (w), 1248 (m), 1111 (m), 1049 (m), 993 (m), 896 (m), 832 (s), 812 (s), 793 (s), 775 (m), 759 (m), 729 (s), 698 (s), 653 (s), 594 (w), 469 (m), 417 (m)  $\text{cm}^{-1}$ ;  **$^1\text{H}$  NMR ( $\text{CDCl}_3$ , 500 MHz):**  $\delta$  7.50–7.48 (2H, m), 7.39–7.33 (3H, m), 5.69 (1H, dt,  $J = 17.6, 10.4$

Hz), 5.08 (1H, d,  $J = 10.4$  Hz), 5.02 (2H, 1H, d,  $J = 10.4$  Hz), 3.74–3.65 (2H, m), 2.15 (1H, td,  $J = 10.0, 4.8$  Hz), 1.47 (1H, s), 0.32 (6H, s);  $^{13}\text{C}$  NMR ( $\text{CDCl}_3$ , 100 MHz):  $\delta$  136.84, 136.75, 134.4, 129.4, 128.0, 115.6, 62.4, 39.7,  $-4.13$ ,  $-4.81$ . HRMS (ESI<sup>+</sup>): Calcd for  $\text{C}_{12}\text{H}_{17}\text{Si}$  [ $\text{M}+\text{H}-\text{H}_2\text{O}$ ]<sup>+</sup>: 189.1100; Found: 189.1106. Specific rotation:  $[\alpha]_{\text{D}}^{20.0} -4.22$  ( $c$  1.47,  $\text{CHCl}_3$ ) for an enantiomerically enriched sample of 98:2 e.r.

Enantiomeric purity was determined by HPLC analysis in comparison with authentic racemic material; Chiralpak AZ–H column, 99.0:1.0 hexanes/*i*PrOH, 0.5 mL/min, 220 nm.

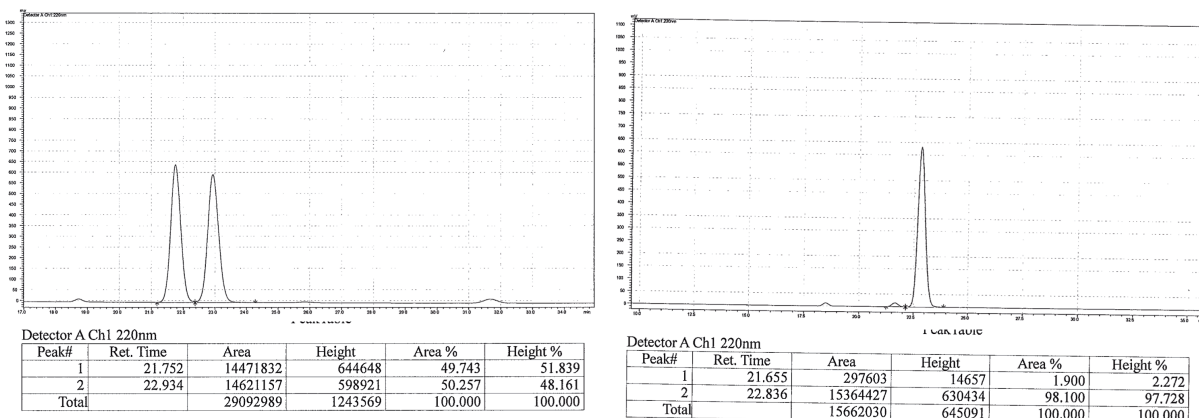

| Retention Time | Area     | Area%  | Retention Time | Area     | Area%  |
|----------------|----------|--------|----------------|----------|--------|
| 21.752         | 14471832 | 49.743 | 21.655         | 297603   | 1.900  |
| 22.934         | 14621157 | 50.257 | 22.836         | 15364427 | 98.100 |

## 6 Formal Synthesis of Rhopaloic Acid A

### 6.1 NHC–Cu-Catalyzed EAS with Allylic Phosphate **2p**

A 100-mL oven-dried flask equipped with a stir bar was charged with imidazolium salt **11b** (35 mg, 55  $\mu\text{mol}$ ), NaOMe (65 mg, 1.20 mmol), and CuCl (5.0 mg, 50  $\mu\text{mol}$ ) in an  $\text{N}_2$ -filled glove box. The vial was sealed with a septum and electrical tape, and removed from the glove box. Tetrahydrofuran (5.0 mL) was added and the mixture was allowed to stir for 2 h under  $\text{N}_2$  at 22 °C. The solution became bright yellow. Bis[(pinacolato)boryl]methane **1** (400 mg, 1.5 mmol) and allylic phosphate **2p** (338 mg, 1.0 mmol) dissolved in thf (5.0 mL) was added through a syringe and the resulting solution was allowed to stir at 22 °C for 6 h. The solution was then passed through a short plug of silica gel and eluted with  $\text{Et}_2\text{O}$ . The organic layer was concentrated *in vacuo*, resulting in yellow oil that was purified by silica gel chromatography (20:1 hexanes/ $\text{Et}_2\text{O}$ ,  $R_f$  0.19) to afford 290 mg of **12p** (>98:2  $S_{\text{N}}2'/S_{\text{N}}2$ ) as pale yellow oil (0.89 mmol, 89% yield). (**R**)-*tert*-Butyldimethyl((2-((4,4,5,5-tetramethyl-1,3,2-dioxaborolan-2-yl)methyl)but-3-en-1-yl)oxy)silane (**12p**): IR (neat): 2978 (w), 2956 (w), 2929 (w), 2888 (w), 2857(w), 1471 (w), 1407 (w), 1368 (s), 1317 (s), 1253 (s), 1213 (w), 1145 (s), 1095 (s), 1004 (w), 969 (w), 888 (w), 834 (s), 774 (s), 667 (m)  $\text{cm}^{-1}$ ;  $^1\text{H}$  NMR ( $\text{CDCl}_3$ , 400 MHz):  $\delta$  5.78 (1H, ddd,  $J = 18.0, 10.4, 7.6$  Hz), 5.03 (1H, app. d,  $J = 17.2$  Hz), 4.97 (1H, app. d,  $J = 10.8$  Hz), 3.49 (2H, d,  $J = 6.4$  Hz), 2.50–

2.41 (1H, m), 1.23 (12H, d,  $J = 2.4$  Hz), 0.96 (1H, dd,  $J = 15.6, 10.0$  Hz), 0.88 (9H, s), 0.79 (1H, dd,  $J = 16.0, 9.2$  Hz), 0.03 (6H, s);  $^{13}\text{C}$  NMR ( $\text{CDCl}_3$ , 150 MHz):  $\delta$  141.7, 114.2, 83.3, 68.2, 42.1, 26.1, 25.1, 24.9, -5.1, -5.2. HRMS (ESI<sup>+</sup>): Calcd for  $\text{C}_{17}\text{H}_{36}\text{BO}_3\text{Si}$  [M+H]<sup>+</sup>: 327.2527; Found: 327.2527. Specific rotation:  $[\alpha]_D^{20.0}$  7.89 ( $c$  0.84,  $\text{CHCl}_3$ ) for an enantiomerically enriched sample of 96:4 e.r.

Enantiomeric purity was determined by HPLC analysis in comparison with authentic racemic material after desilylation and benzylation of the resulting alcohol; Chiralpak AZ-H column, 97.0:3.0 hexanes/*i*PrOH, 0.3 mL/min, 220 nm.

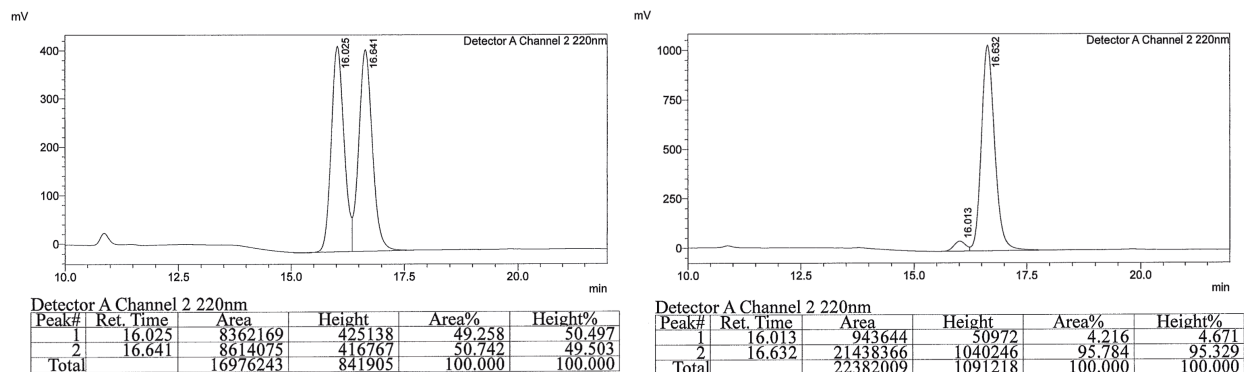

| Retention Time | Area    | Area%  | Retention Time | Area    | Area%  |
|----------------|---------|--------|----------------|---------|--------|
| 16.025         | 8362169 | 49.258 | 16.013         | 50972   | 4.216  |
| 16.641         | 8614075 | 50.742 | 16.632         | 1040246 | 95.784 |

## 6.2 Phosphine-Palladium Catalyzed Suzuki Cross-Coupling<sup>10</sup> with Alkenyl Iodide

A 4-dram vial with a stir bar was charged with alkyl-B(pin) **12p** (290 mg, 0.89 mmol) and a solution of 9-BBN dimer (119 mg, 0.97 mmol) in thf (0.5 ml). After 12 h, the mixture was transferred to a 25 mL flask under nitrogen atmosphere containing  $\text{PdCl}_2(\text{dppf})_2$  (36 mg, 0.045 mmol),  $\text{K}_3\text{PO}_4$  (378 mg, 1.78 mmol), alkenyl iodide **14** (308 mg, 0.97 mmol) and 3 mL dmf. Then 150  $\mu\text{L}$  deionized water (sparged with nitrogen) was transferred to the flask and the mixture was allowed to stir at 50 °C for 24 h. At this time, the reaction was quenched by addition of a saturated solution of  $\text{NH}_4\text{Cl}$  and the inorganic layer was washed with  $\text{Et}_2\text{O}$  (5.0 mL, three times). The combined organic layer was concentrated *in vacuo* and purified by silica gel chromatography (20:1 hexanes/ $\text{Et}_2\text{O}$ ,  $R_f = 0.25$ ) to afford **15** as colorless oil (402 mg, 87% yield). **tert-Butyldimethyl(((R,5E,9E)-6,10,14-trimethyl-2-((4,4,5,5-tetramethyl-1,3,2-dioxaborolan-2-yl)methyl)pentadeca-5,9,13-trien-1-yl)oxy)silane (15)**: IR (neat): 2956 (s), 2927 (s), 2855 (s), 1447 (m), 1372 (s), 1317 (m), 1252 (m), 1146 (s), 1093 (s), 969 (w), 8356 (s), 813 (w), 774 (s)  $\text{cm}^{-1}$ ;  $^1\text{H}$  NMR ( $\text{CDCl}_3$ , 400 MHz):  $\delta$  5.14–5.07 (3H, m), 3.50 (1H, dd,  $J = 10.0, 5.6$  Hz), 3.44 (1H, dd,  $J = 9.6, 6.4$  Hz), 2.10–2.03 (4H, m), 1.99–1.95 (6H, m), 1.77–1.71 (1H, m), 1.67 (3H, s), 1.59 (9H, s), 1.53–1.43 (2H, m), 1.23 (12H, s), 0.88 (9H, s), 0.82–0.76 (2H, m), 0.03 (6H, s);  $^{13}\text{C}$

[10] S. R. Chemler, D. Trauner, S. J. Danishefsky, *Angew. Chem. Int. Ed.* **2001**, *40*, 4544–4568.

**NMR (CDCl<sub>3</sub>, 100 MHz):**  $\delta$  135.0, 134.7, 131.3, 125.1, 124.6, 124.5, 82.9, 62.6, 39.90, 39.87, 36.9, 33.6, 27.0, 26.9, 26.8, 26.1, 25.8, 25.6, 25.0, 24.9, 18.5, 17.8, 16.13, 16.10, -5.2. **HRMS (ESI<sup>+</sup>):** Calcd for C<sub>31</sub>H<sub>60</sub>BO<sub>3</sub>Si [M+H]<sup>+</sup>: 519.4405; Found: 519.4422. Specific rotation:  $[\alpha]_D^{20.0}$  2.61 (*c* 1.15, CHCl<sub>3</sub>) for an enantiomerically enriched sample of 96:4 e.r.

### 6.3 Deprotection/NHC–Cu-catalyzed Allylic Substitution to Obtain 18

To a solution of alkyl-B(pin) **15** (402 mg, 0.77 mmol) in anhydrous methanol (1.0 ml) was added *p*-TsOH (6.6 mg, 0.039 mmol) at 22 °C and the mixture was allowed to stir for 2 h. The resulting solution was concentrated *in vacuo* to remove methanol. A 4-dram vial was charged with CuCl (19 mg, 0.19 mmol), imidazolium salt (26 mg, 0.076 mmol), KO<sup>*t*</sup>Bu (129 mg, 1.2 mmol) and thf (5.0 ml) was allowed to stir at 22 °C for 2 h. Then the crude of desilylation and allyl phosphate (224 mg, 1.2 mol) in thf (2.0 ml) was transferred to the vial and the reaction mixture was allowed to stir at 70 °C for 24 h. The reaction was then quenched by passing the solution through a short plug of silica gel, after which it was washed with Et<sub>2</sub>O (20 ml), concentrated *in vacuo* to afford a pale yellow oily residue, which was purified by silica gel chromatography (6:1 hexanes/Et<sub>2</sub>O, R<sub>f</sub> = 0.30) to deliver alcohol **16** as colorless oil (165 mg, 0.51 mmol, 67% yield). **(R,5E,9E)-2-(But-3-en-1-yl)-6,10,14-trimethylpentadeca-5,9,13-trien-1-ol (16): IR (neat):** 3323 (s), 2966 (m), 2917 (s), 2855 (s), 1641 (w), 1449 (m), 1379 (m), 1202 (w), 1107 (w), 1032 (s), 993 (s), 908 (s), 833 (m), 743 (w) cm<sup>-1</sup>; **<sup>1</sup>H NMR (CDCl<sub>3</sub>, 400 MHz):**  $\delta$  5.87 (1H, m), 5.14–5.08 (1H, m), 5.05–4.99 (1H, m), 4.95 (1H, dt, *J* = 10.0, 0.8 Hz), 3.57 (2H, d, *J* = 4.8 Hz), , 2.12–2.05 (6H, m), 2.03–1.95 (6H, m), 1.68 (3H, s), 1.60 (9H, s), 1.54–1.33 (5H, m); **<sup>13</sup>C NMR (CDCl<sub>3</sub>, 100 MHz):**  $\delta$  139.1, 135.4, 135.1, 131.4, 124.6, 124.5, 124.3, 114.6, 65.5, 39.9, 39.7, 31.6, 31.3, 31.1, 30.3, 26.9, 26.8, 25.5, 25.3, 17.8, 16.18, 16.16. **HRMS (ESI<sup>+</sup>):** Calcd for C<sub>22</sub>H<sub>39</sub>O [M+H]<sup>+</sup>: 319.3001; Found: 319.3008. Specific rotation:  $[\alpha]_D^{20.0}$  -3.74 (*c* 0.80, CHCl<sub>3</sub>) for an enantiomerically enriched sample of 96:4 e.r.

### 6.4 Catalytic Cross-Metathesis with Acrolein<sup>11</sup>

In a 1-dram vial with a stir bar was charged with alkene **16** (16 mg, 0.051 mmol) and acrolein (67  $\mu$ l, 1.02 mmol). A solution of Ru complex **17** (0.01 M in CH<sub>2</sub>Cl<sub>2</sub>, 0.5 mL, 0.005 mmol, 1.0 mol %) was introduced and the mixture was allowed to stir at 22 °C for 0.5 h under nitrogen atmosphere. Then the mixture was flushed through a short plug of silica gel with Et<sub>2</sub>O and concentrated *in vacuo* and purified by silica gel chromatography (6:1 hexanes/Et<sub>2</sub>O, R<sub>f</sub> = 0.35 to 1:1 hexanes/Et<sub>2</sub>O) to afford  $\alpha,\beta$ -unsaturated aldehyde **18** (>98:2 E/Z) as colorless oil (13.5 mg, 71% yield). **(R,2E,9E,13E)-6-(Hydroxymethyl)-10,14,18-trimethylnonadeca-2,9,13,17-tetraenal (18): IR (neat):** 2962 (m), 2917 (s), 2870 (m), 2851 (m), 2184 (w), 2138 (w), 2033 (w), 1691 (s), 1636 (w), 1449 (w), 1379 (w), 1131 (w), 1102 (w), 1035 (w), 1023 (w) cm<sup>-1</sup>; **<sup>1</sup>H NMR (CDCl<sub>3</sub>, 400 MHz):**  $\delta$  9.51 (1H, d, *J* = 8.0 Hz), 6.86 (1H, dt, *J* = 15.6, 6.4 Hz), 6.14 (1H, ddt, *J* = 16.0, 8.0, 1.6 Hz), 5.13–5.07 (3H, m), 3.63 (1H, *J* = 10.4, 4.0 Hz), 2.37 (2H, *J* = 6.0 Hz), 2.10–1.95 (10H, m), 1.68 (3H, d, *J* = 1.2 Hz), 1.60 (9H, s), 1.58–1.34 (5H, m); **<sup>13</sup>C NMR (CDCl<sub>3</sub>, 100 MHz):**  $\delta$  194.2, 158.8, 135.7, 135.2, 133.1, 131.5, 124.5, 124.25, 124.20, 65.2, 39.9, 39.8, 39.7,

(11) J. C. Killen, J. Leonard, V. K. Aggarwal, *Synlett*. **2010**, 4, 579–582.

31.0, 30.3, 29.4, 26.9, 26.7, 25.9, 25.3, 17.8, 16.22, 16.17. **HRMS (ESI<sup>+</sup>)**: Calcd for C<sub>23</sub>H<sub>39</sub>O<sub>2</sub> [M+H]<sup>+</sup>: 374.2950; Found: 374.2957. Specific rotation:  $[\alpha]_{\text{D}}^{20.0}$  -3.17 (*c* 0.80, CHCl<sub>3</sub>) for an enantiomerically enriched sample of 96:4 e.r.

### 6.5 Catalytic Oxa-Michael Addition<sup>12</sup>

To a solution of aldehyde **18** (32.3 mg, 0.078 mmol) in CH<sub>2</sub>Cl<sub>2</sub> (3.0 mL, 0.026 M) was added dropwise a 1:1 mixture of pyrrolidine/BzOH (0.28 mL, 0.054 M in CH<sub>2</sub>Cl<sub>2</sub>) at 22 °C. After the solution was allowed to stir for 1 h at 22 °C, it was diluted with hexanes (30.0 mL), filtered through a short pad of silica gel (hexanes/EtOAc, 3/1), and concentrated *in vacuo*. The resulting residue was purified by silica gel chromatography (5:1 hexanes/Et<sub>2</sub>O, R<sub>f</sub> 0.36) to afford aldehyde **19** (31.6 mg, diastereoisomer ratio 8:1) as colorless oil. **2-((2R,5S)-5-((3E,7E)-4,8,12-Trimethyltrideca-3,7,11-trien-1-yl)tetrahydro-2H-pyran-2-yl)acetaldehyde (19)**: **IR (neat)**: 3070 (w), 2958 (w), 2899 (w), 2173 (w), 1626 (w), 1487 (w), 1427 (w), 1411 (w), 1317 (w), 1248 (m), 1112 (m), 1040 (w), 998 (w), 942 (w), 899 (w), 836 (s), 813 (s), 778 (m), 758 (s), 723 (s), 697 (s), 642 (m), 548 (w), 469 (m) cm<sup>-1</sup>; **<sup>1</sup>H NMR (CDCl<sub>3</sub>, 600 MHz)**: δ 9.79 (1H, t, *J* = 2.4 Hz), 5.11–5.07 (3H, m), 3.94–3.91 (1H, m), 3.78–3.73 (1H, m), 3.06 (1H, t, *J* = 10.8 Hz), 2.58 (1H, ddd, *J* = 16.8, 7.8, 3.0 Hz), 2.47 (1H, ddd, *J* = 16.2, 4.8, 1.8 Hz), 2.09–2.04 (4H, m), 2.00–1.96 (6H, m), 1.68–1.67 (4H, m), 1.60 (9H, d), 1.57–1.54 (1H, m), 1.37 (1H, qd, *J* = 10.8, 3.0 Hz), 1.21–1.11 (2H, m); **<sup>13</sup>C NMR (CDCl<sub>3</sub>, 150 MHz)**: δ 201.6, 135.5, 135.1, 131.4, 124.5, 124.29, 124.25, 73.8, 73.2, 50.1, 39.9, 39.8, 35.2, 32.7, 31.9, 30.3, 26.9, 26.1, 25.8, 25.1, 17.8, 16.2, 16.1. **HRMS (ESI<sup>+</sup>)**: Calcd for C<sub>17</sub>H<sub>27</sub>Si<sub>2</sub> [M+H]<sup>+</sup>: 287.1651; Found: 287.1654. Specific rotation:  $[\alpha]_{\text{D}}^{20.0}$  -1.97 (*c* 0.65, CHCl<sub>3</sub>) for an enantiomerically enriched sample of 96:4 e.r.

## 7 <sup>1</sup>H NMR and <sup>13</sup>C NMR Spectra

---

[12] K. Lee, H. Kim, J. Hong, *Org Lett.* **2011**, *13*, 2722–2725.

XCF-II-110-2

Sample Name:  
sy-III-191-b-pro  
Data Collected on:  
nmr19-vnmrs600  
Archive directory:

Sample directory:

FidFile: PROTON

Pulse Sequence: PROTON (s2pu1)  
Solvent: cdcl3  
Data collected on: Dec 18 2015

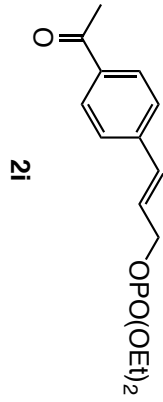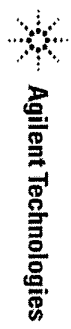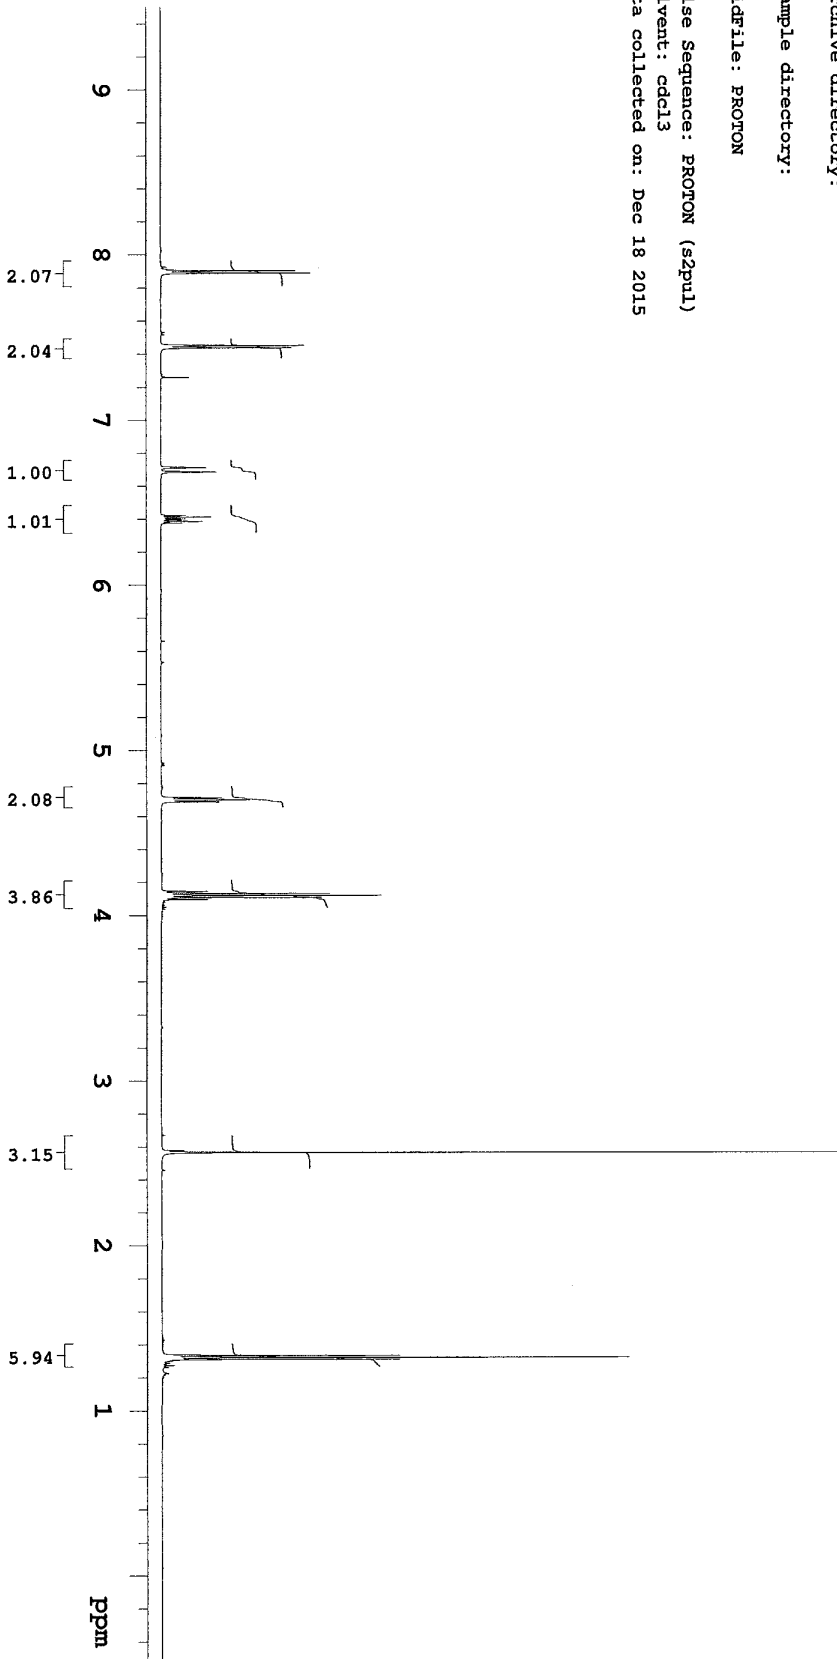

XCF-IT-110-2

Sample Name:

Data Collected on:

nmr19-vnmr5600

Archive directory:

Sample directory:

FIDFile: CARBON

Pulse Sequence: CARBON (s2pu1)

Solvent: cdcl3

Data collected on: Dec 18 2015

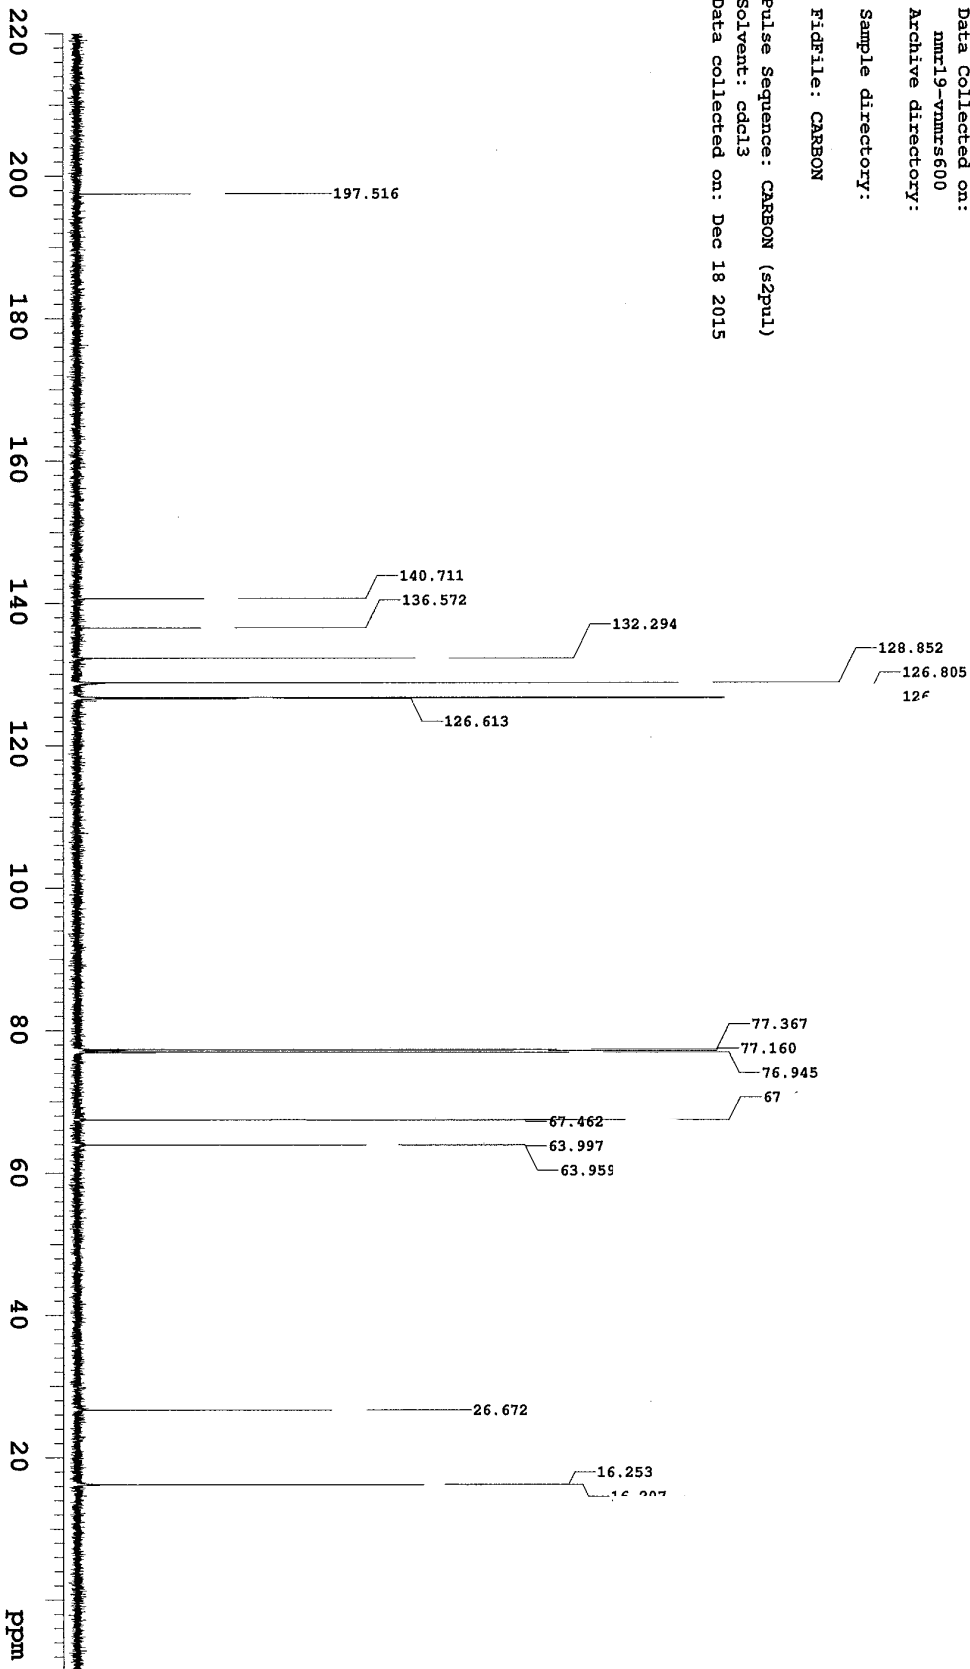

NM-5-121crude  
Sample Name: SY-II-113-81-pro  
Data Collected on: vnmr13-vnmrs400  
Archive directory:  
Sample directory:  
F1df1le: PROTON  
Pulse Sequence: PROTON (s2pu1)  
Solvent: cdcl3  
Data collected on: Aug 28 2014

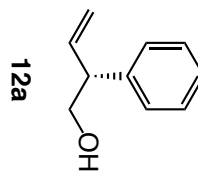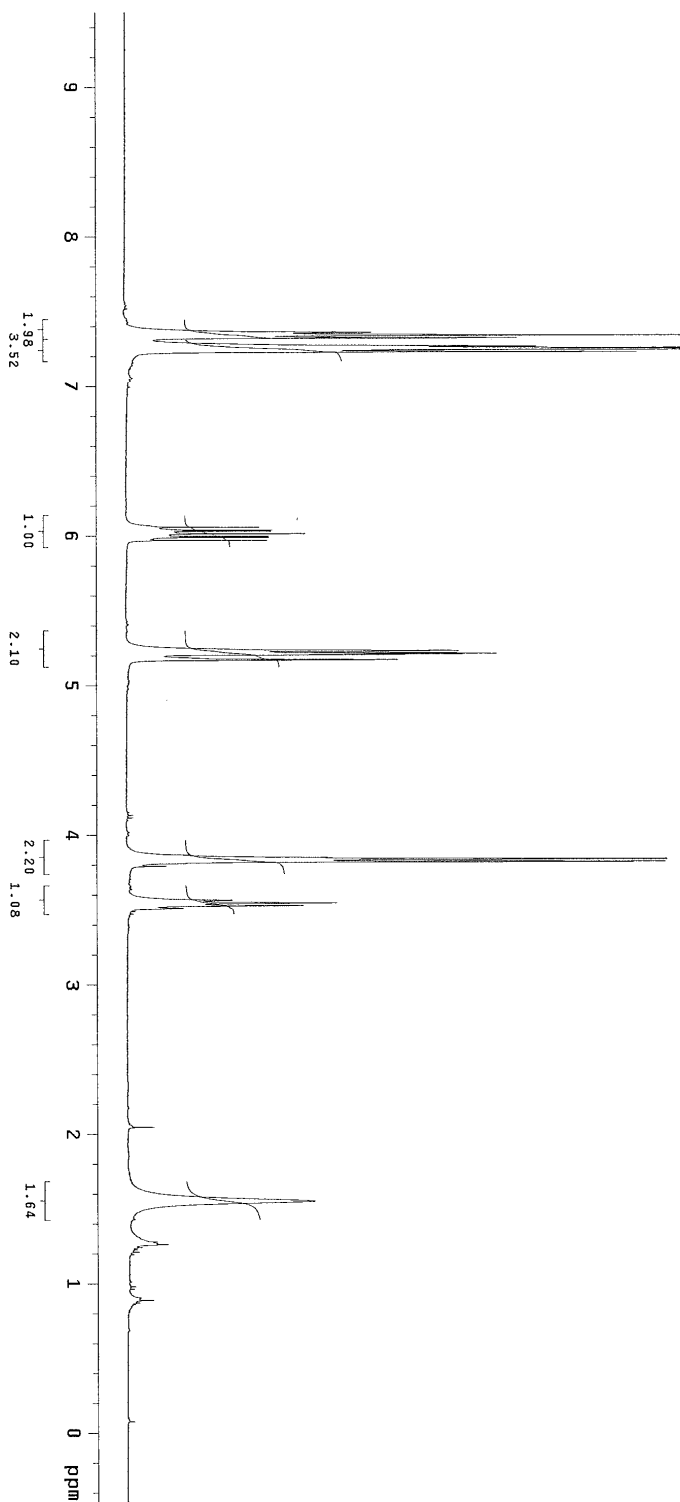



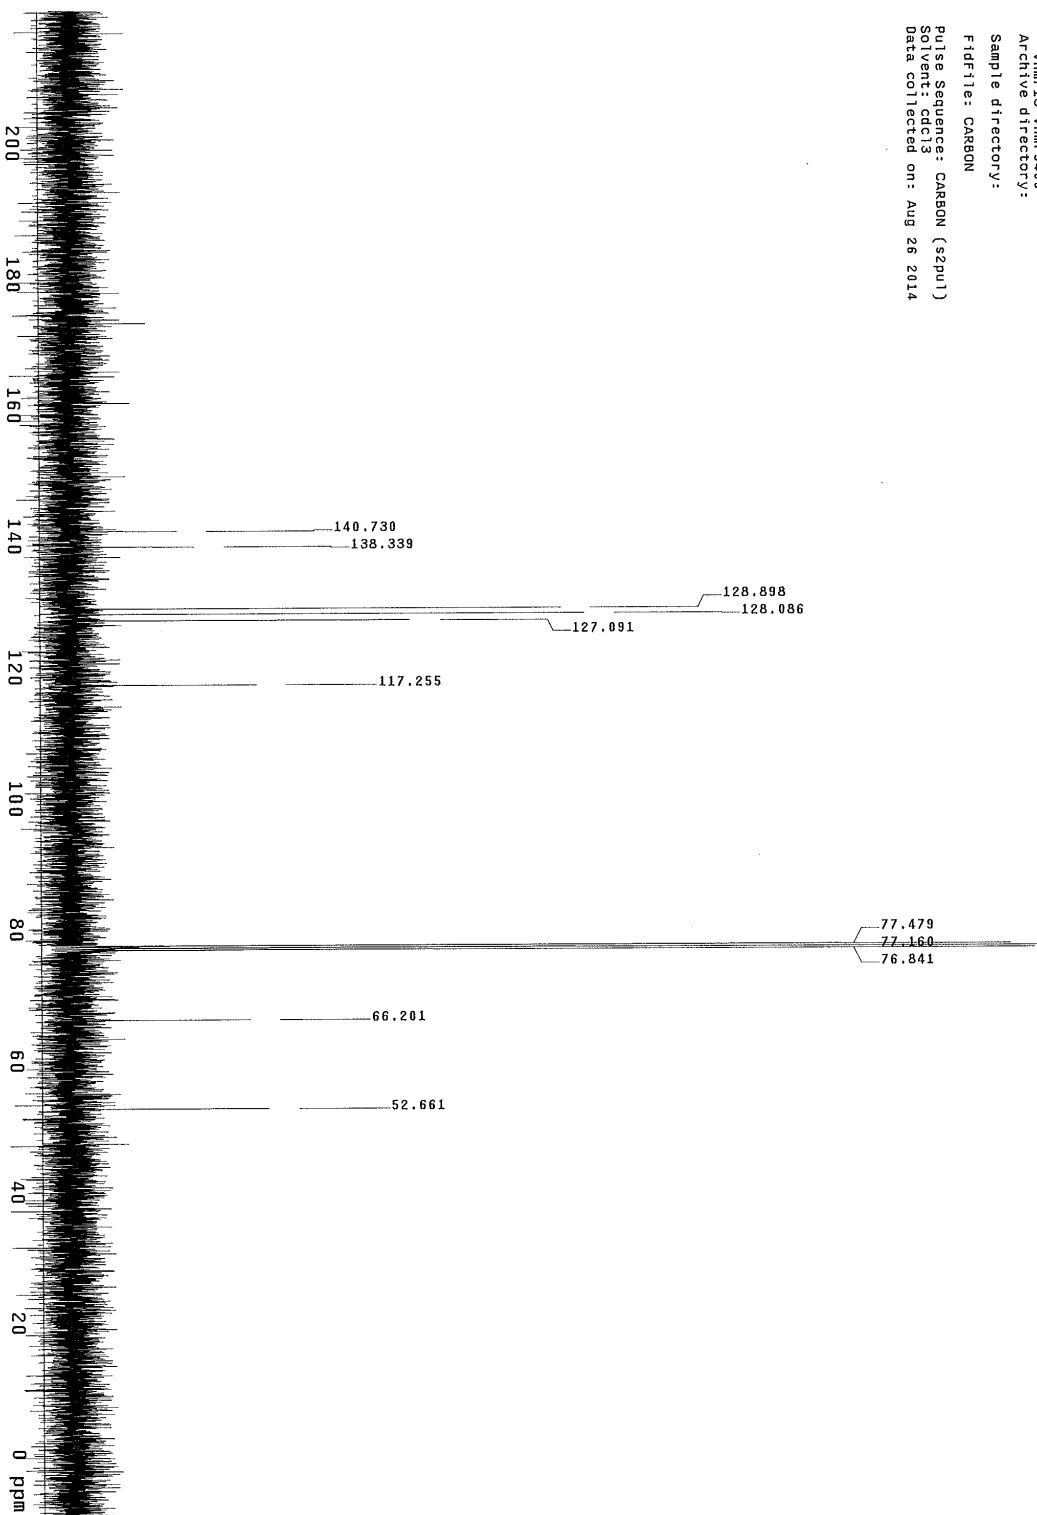

MKK-III-260A-1H, purified

Sample Name: sy-III-119-al-pro  
Data Collected on: vnmr-13-vnmr-s400  
Archive directory:  
Sample directory:  
Fidfile: CARBON

Pulse Sequence: CARBON (szpu1)  
Solvent: cdcl3  
Data collected on: Aug 26 2014

Sample Name: 5y-11-19-41-pro  
Data Collected on: vnmr3-vnmr3400  
Archive directory:  
Sample directory:  
Fidfile: PROTON  
Pulse Sequence: PROTON (szpu1)  
Solvent: cdcl3  
Data Collected on: Aug 26 2014

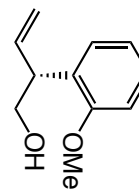

12b

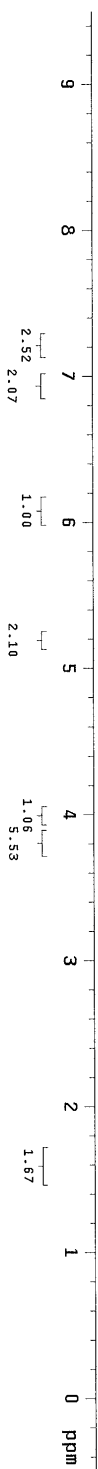

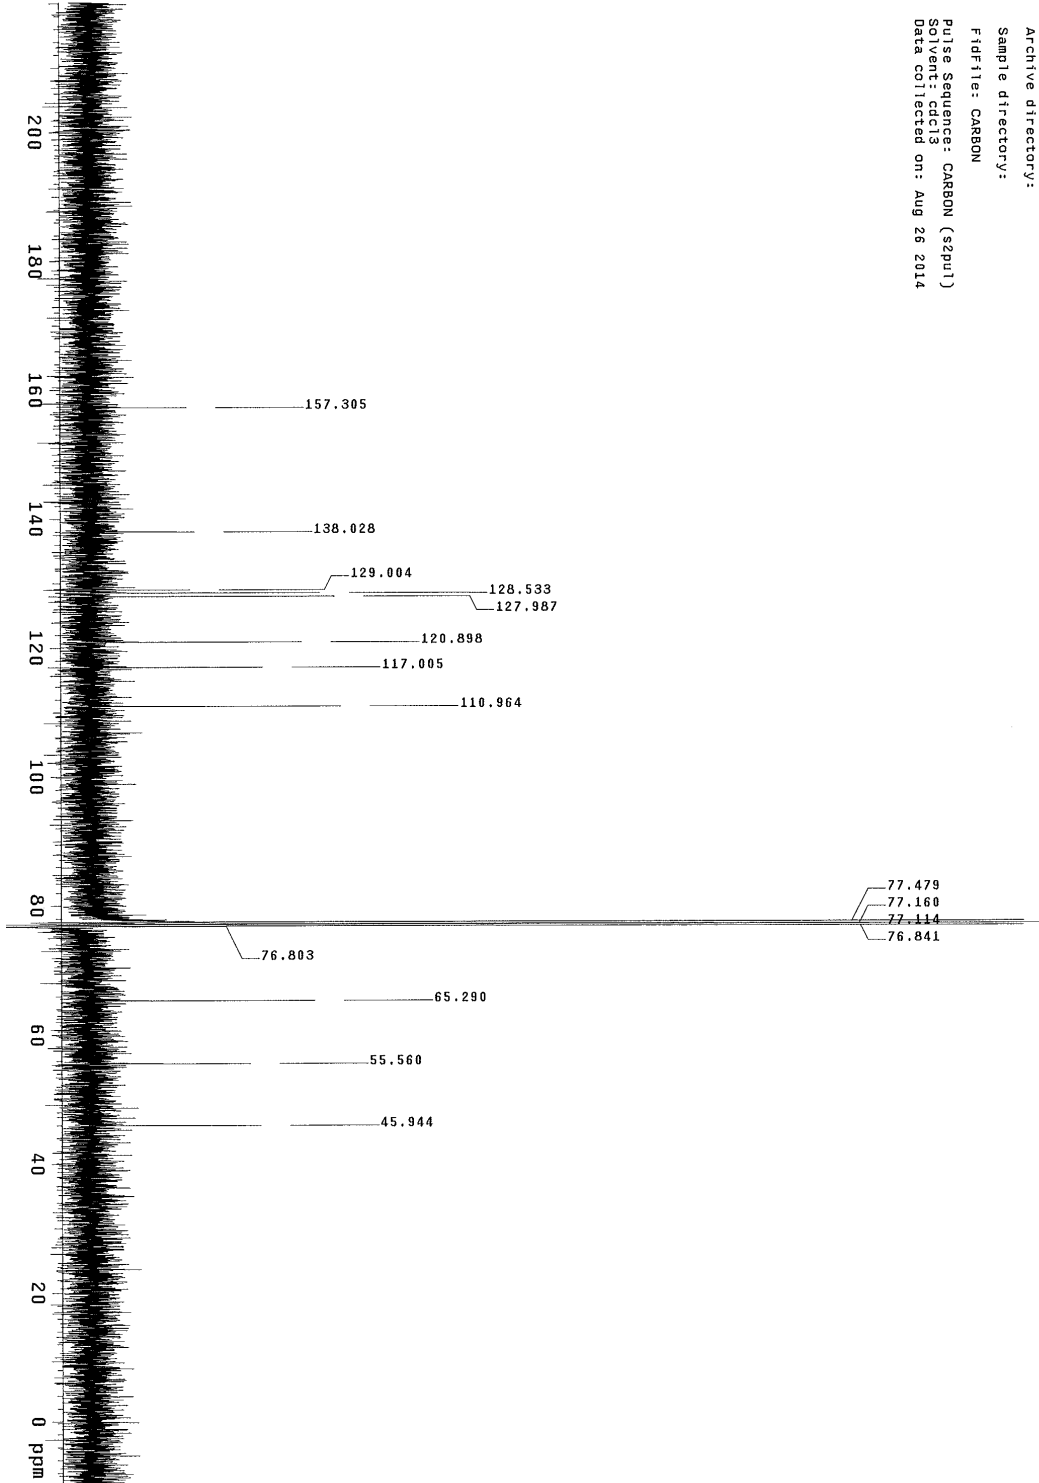

Sample Name: sy-II-119-d1-pro  
Data Collected on: vnmr3-vnmr3400  
Archive directory: Sample directory:  
Fidfile: CARBON  
Pulse Sequence: CARBON (s2pu1)  
Solvent: dcl3  
Data Collected on: Aug 26 2014

MK-III-260A-1H, purified

Sample Name: sy-III-19-b1-pro  
Data Collected on: vnmr13-vnmr5400  
Archive directory:  
Sample directory:  
Fidfile: PROTON  
Pulse Sequence: PROTON (s2pu1)  
Solvent: cdcl3  
Data collected on: Aug 26 2014

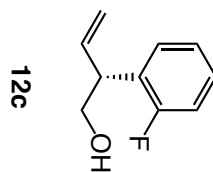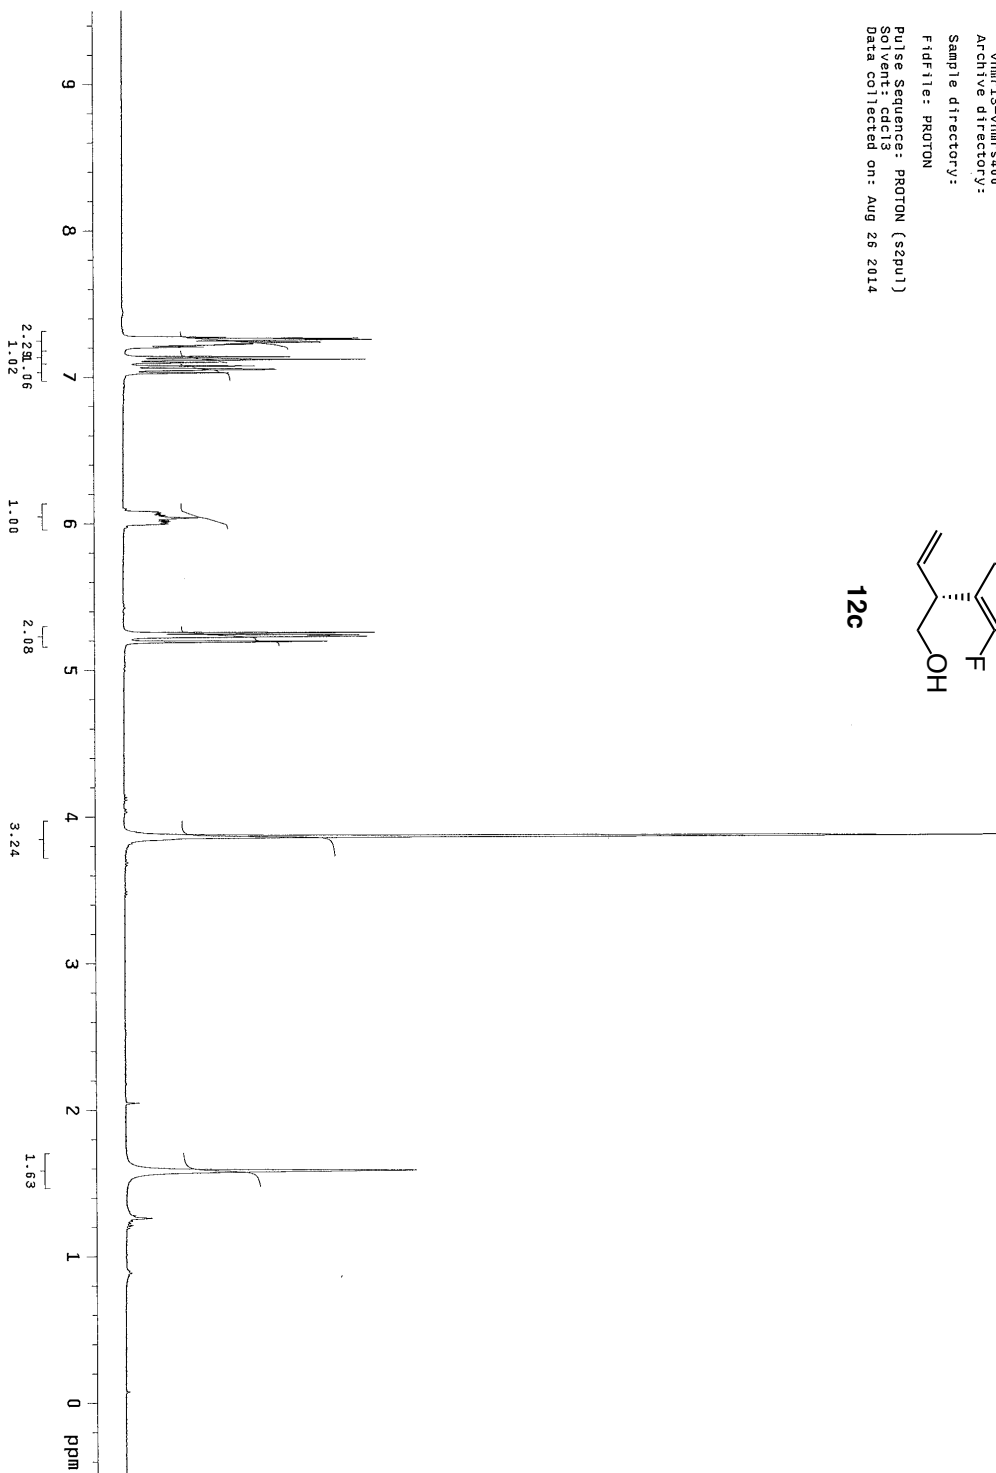

MJK-III-260A-1H, purified

Sample Name:  
SY-III-119-B1-pro  
Data Collected on:  
VHM-13-VHM240  
Archive directory:  
Sample directory:  
Fidfile: CARBON

Pulse Sequence: CARBON (s2pu1)  
Solvent: cdcl3  
Data collected on: Aug 26 2014

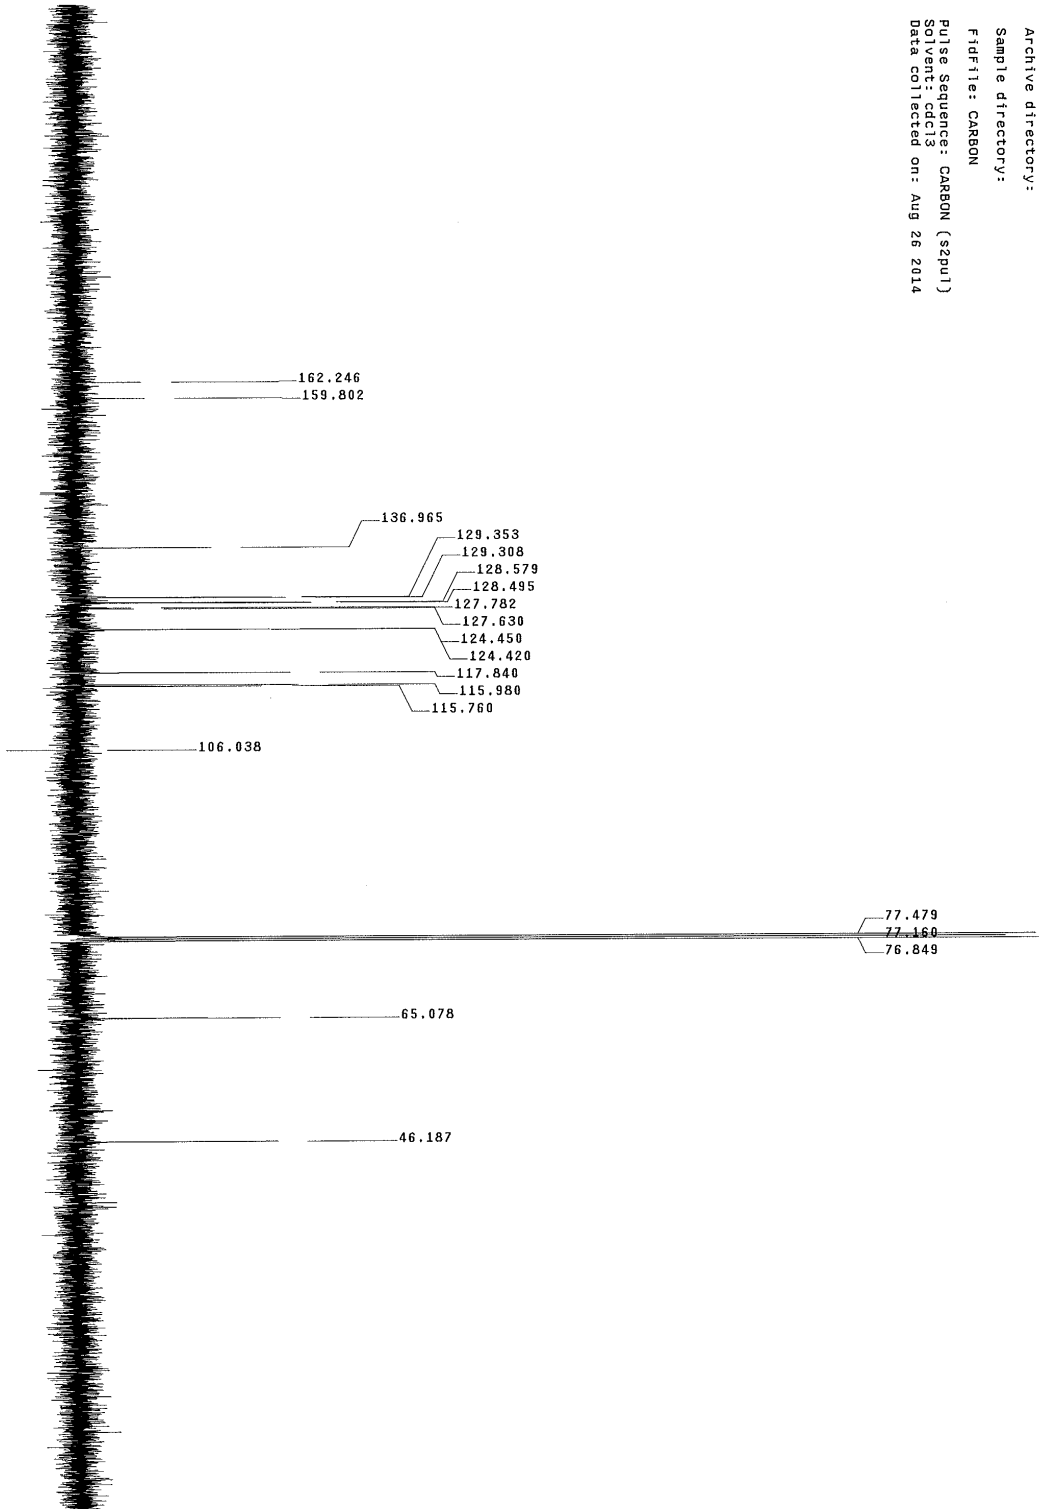

STANDARD FLUORINE PARAMETERS

Sample Name: -c-2-oxi-pro  
SYNTH 1389  
Date: 01/13/09  
VMP13-VMP1400  
Archive directory:  
Sample directory:  
Fidfile: PROTON  
Pulse Sequence: PROTON (szpu1)  
Solvent: DMSO  
Data collected on: Sep 3 2014

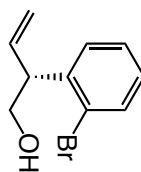

12d

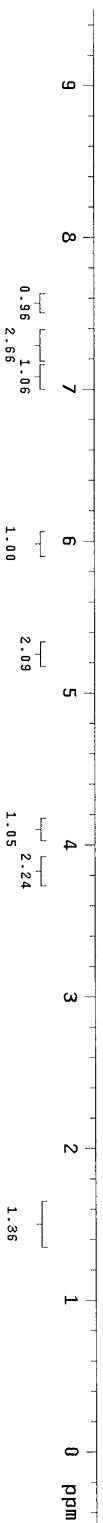

Sample Name: sv-111-119-cl-pro  
Data Collected on: vnmr-13-vnmr5400  
Archive directory:  
Sample directory:  
Fidfile: CARBON  
Pulse Sequence: CARBON (szpu1)  
Solvent: cdcl3  
Data collected on: Aug 26 2014

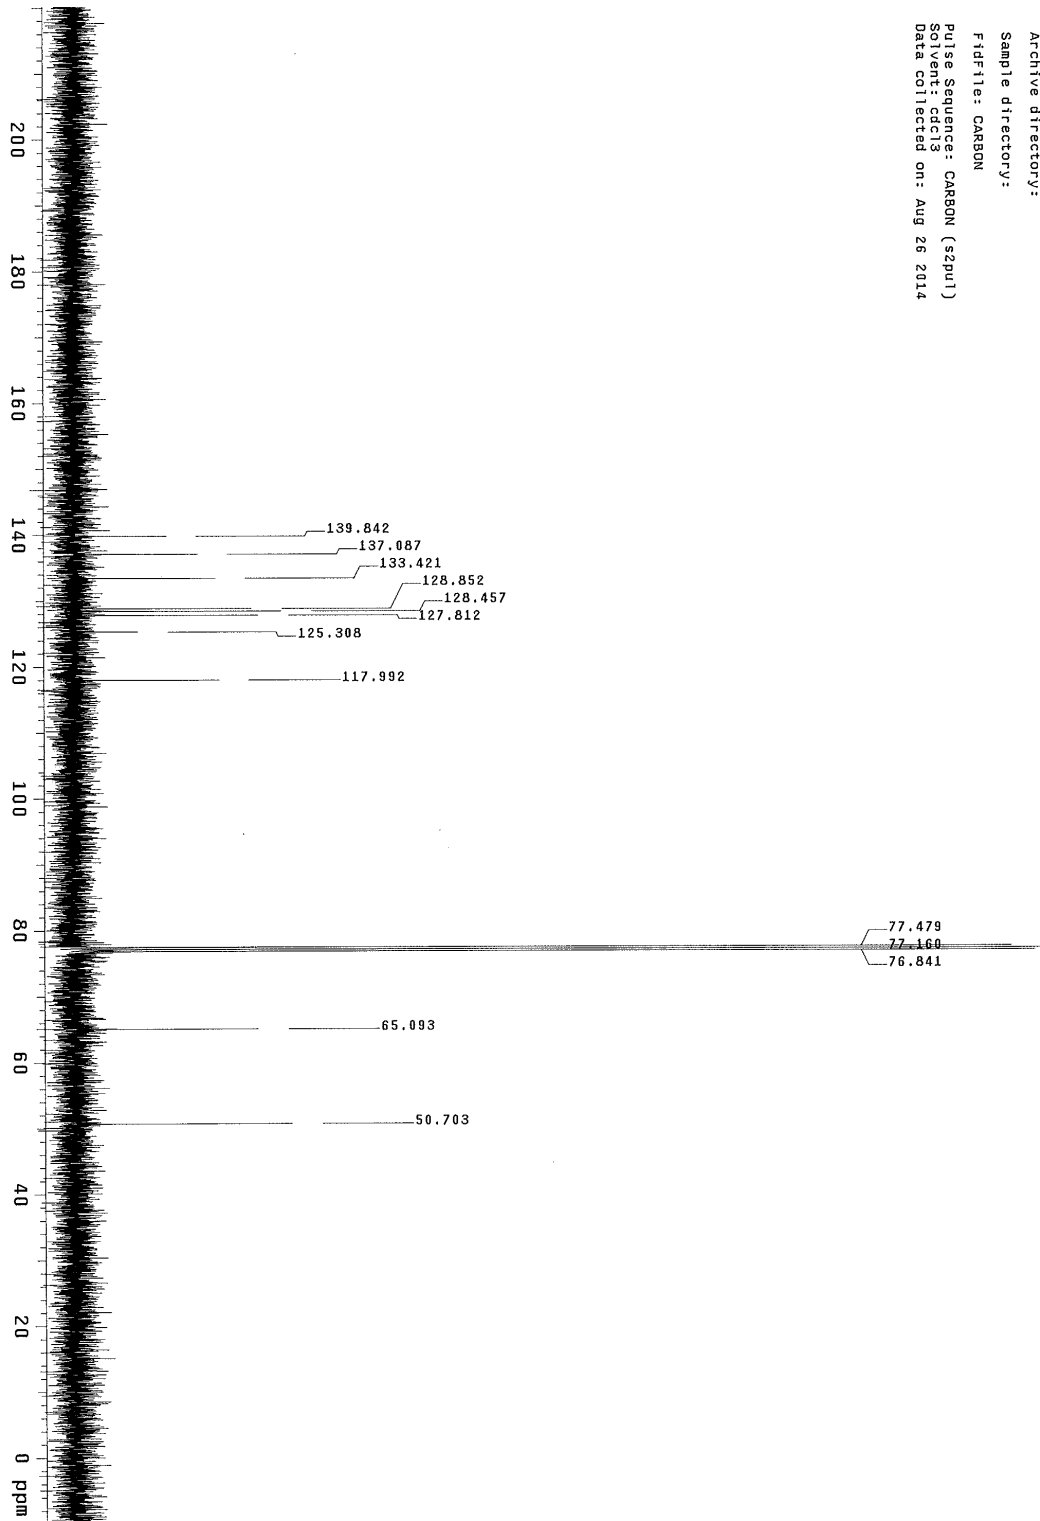

Sample Name: sy-111-122-c1-pro  
Data Collected on: 07/15/2014  
Name of Operator: yhm  
Archive directory:  
Sample directory:  
Fidfile: PROTON  
Pulse Sequence: PROTON (szpu1)  
Solvent: cdcl3  
Data Collected on: Sep 5 2014

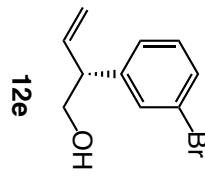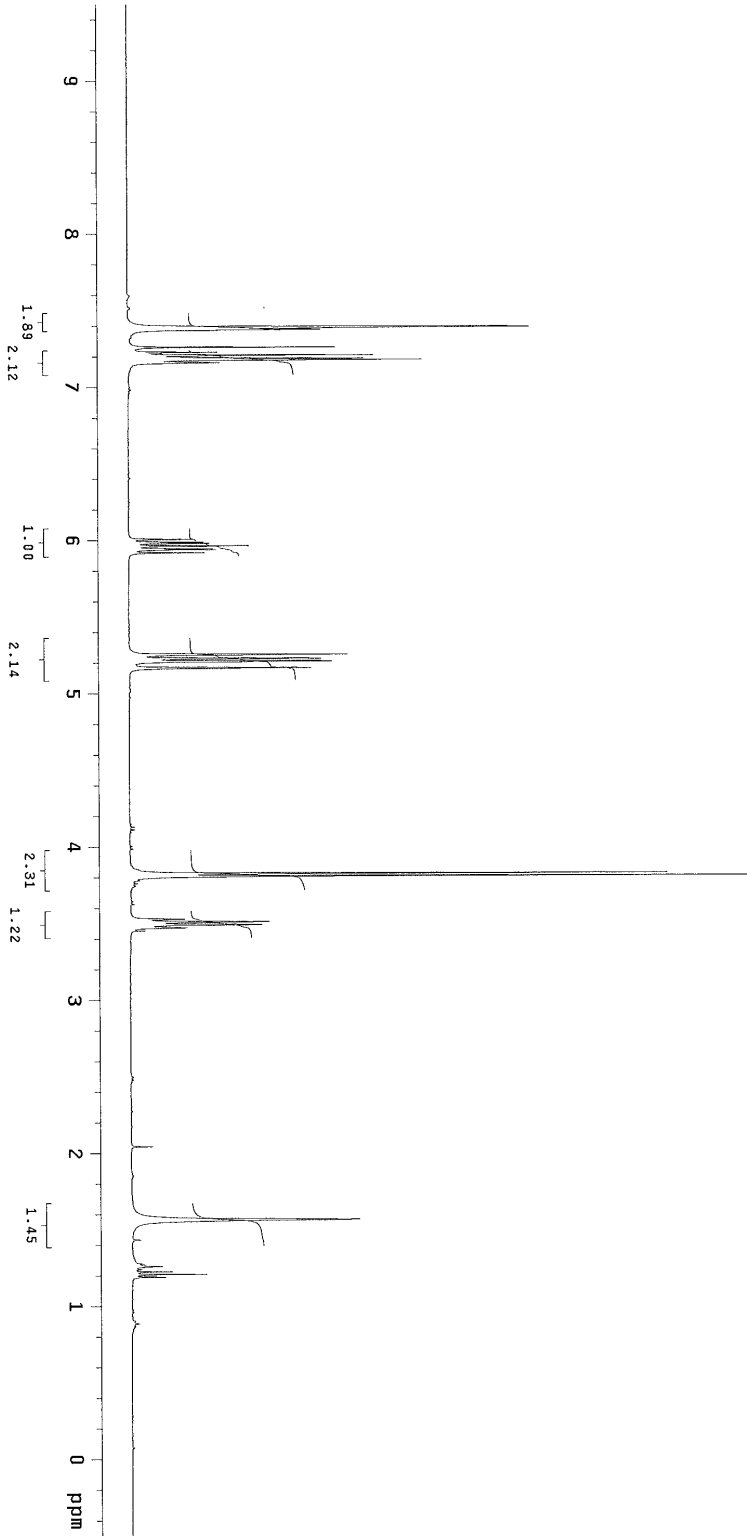



Sample Name: SY-IT-122-cl-pro  
Data Collected on: 11/11/2014 11:40:40  
Sample Name: SY-IT-122-cl-pro  
Archive directory:  
Sample directory:  
FID file: CARBON  
Pulse Sequence: CARBON (szpu1)  
Solvent: cdcl3  
Data collected on: Sep 5 2014

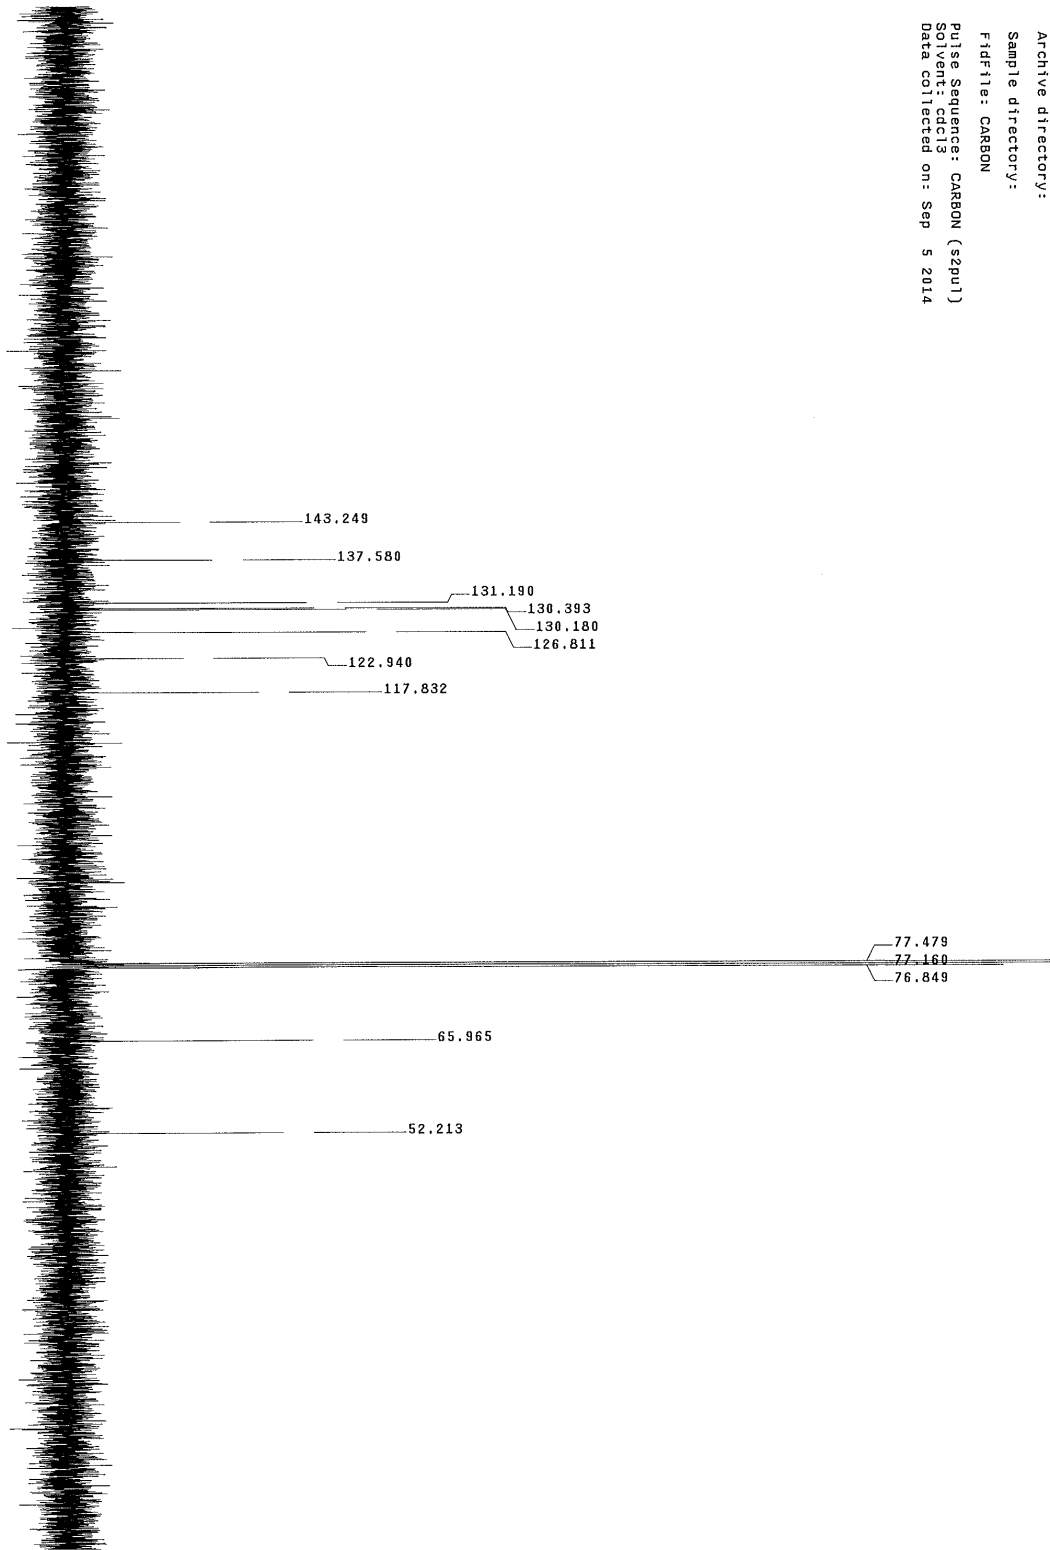

HJ-IX-59-crude5  
Jan.07.16

Sample Name:  
sy-III-Cl-boh  
Data Collected on:  
nmr13-rnms400  
Archive directory:

Sample directory:

FidFile: PROTON

Pulse Sequence: PROTON (s2pul)  
Solvent: cdcl3  
Data collected on: Jan 7 2016

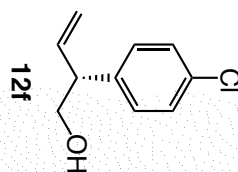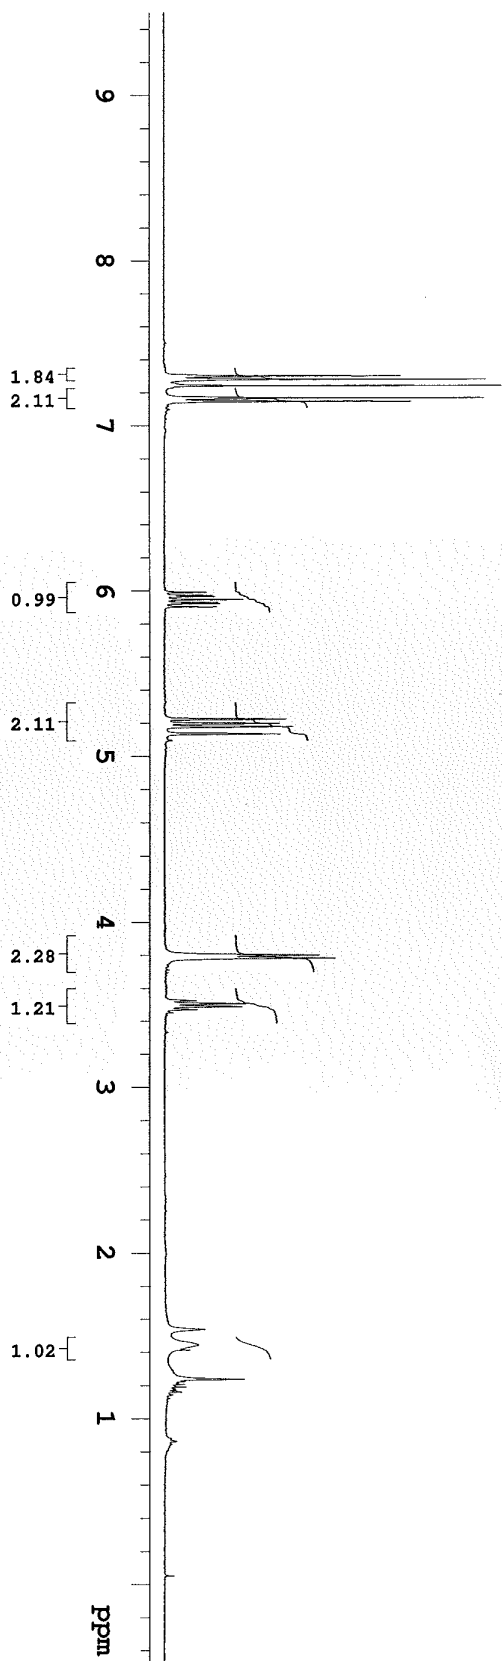

Sample Name: 11-20-81-pro  
Data collected on: vnmr3-vnmr9400  
Archive directory:  
Sample directory:  
Fidfile: CARBON  
Pulse Sequence: CARBON (s2pu1)  
Solvent: cdcl3  
Data collected on: Sep 4 2014

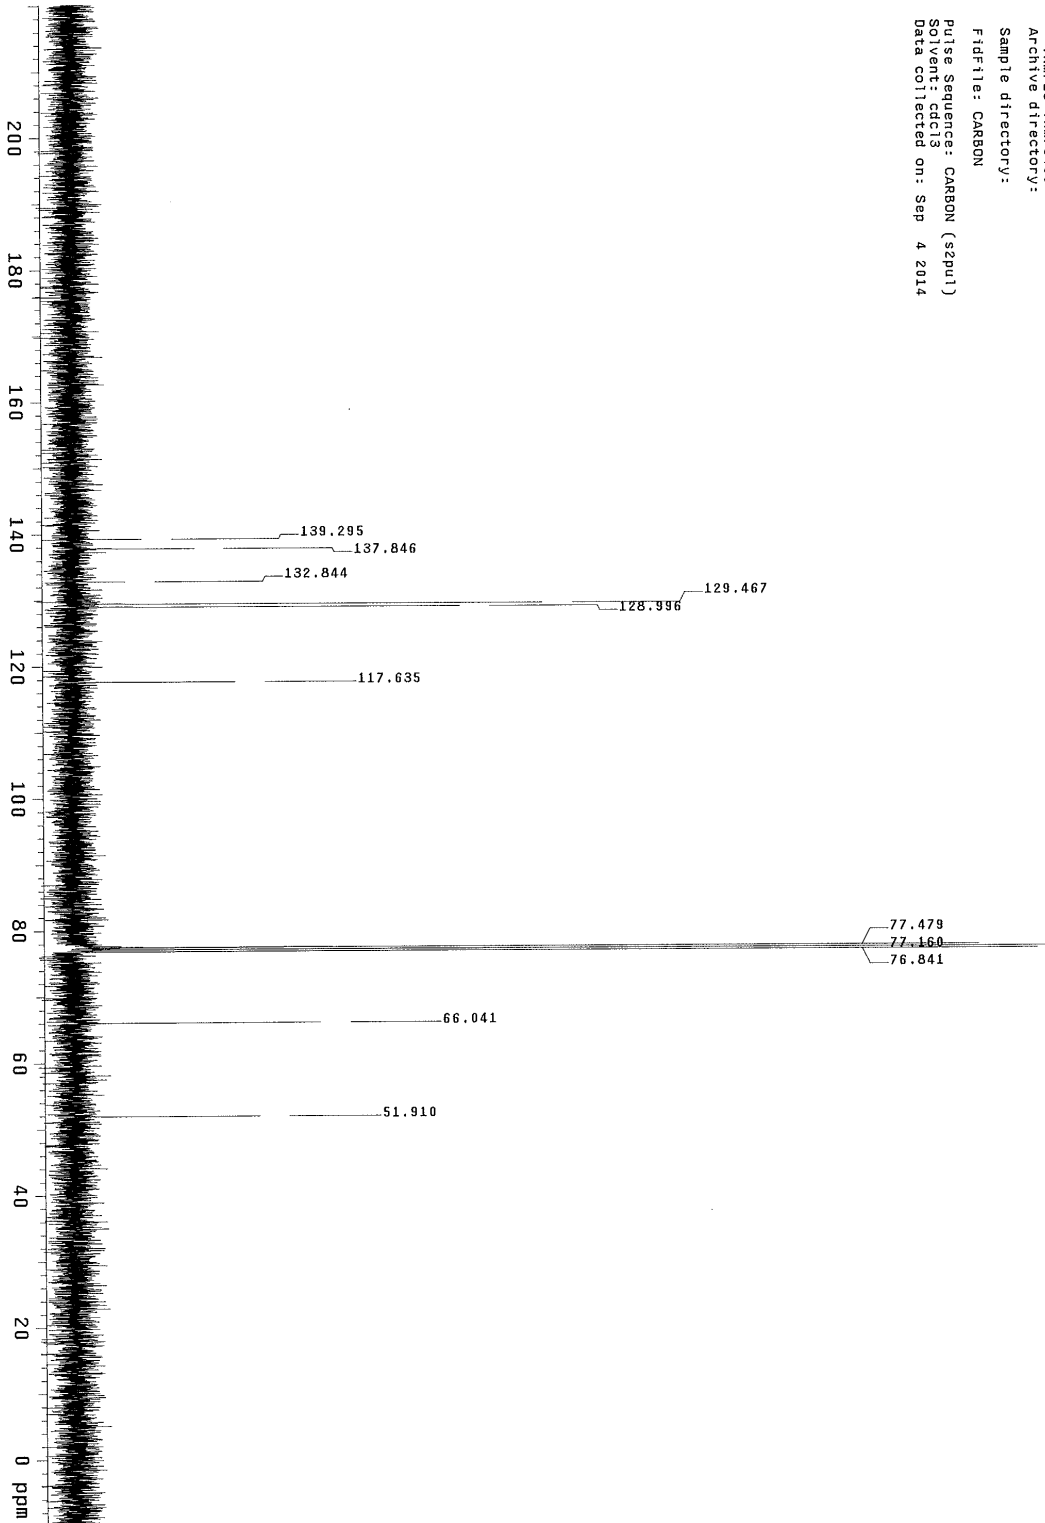

Sample Name: sy-11-18-a1-pro  
Data Collected on: nmf18-vmr5508  
Archive directory:  
Sample directory:  
Fidfile: PROTON  
Pulse Sequence: PROTON (s2pu1)  
Solvent: cdcl3  
Data collected on: Sep 24 2014

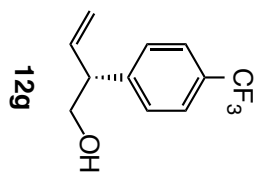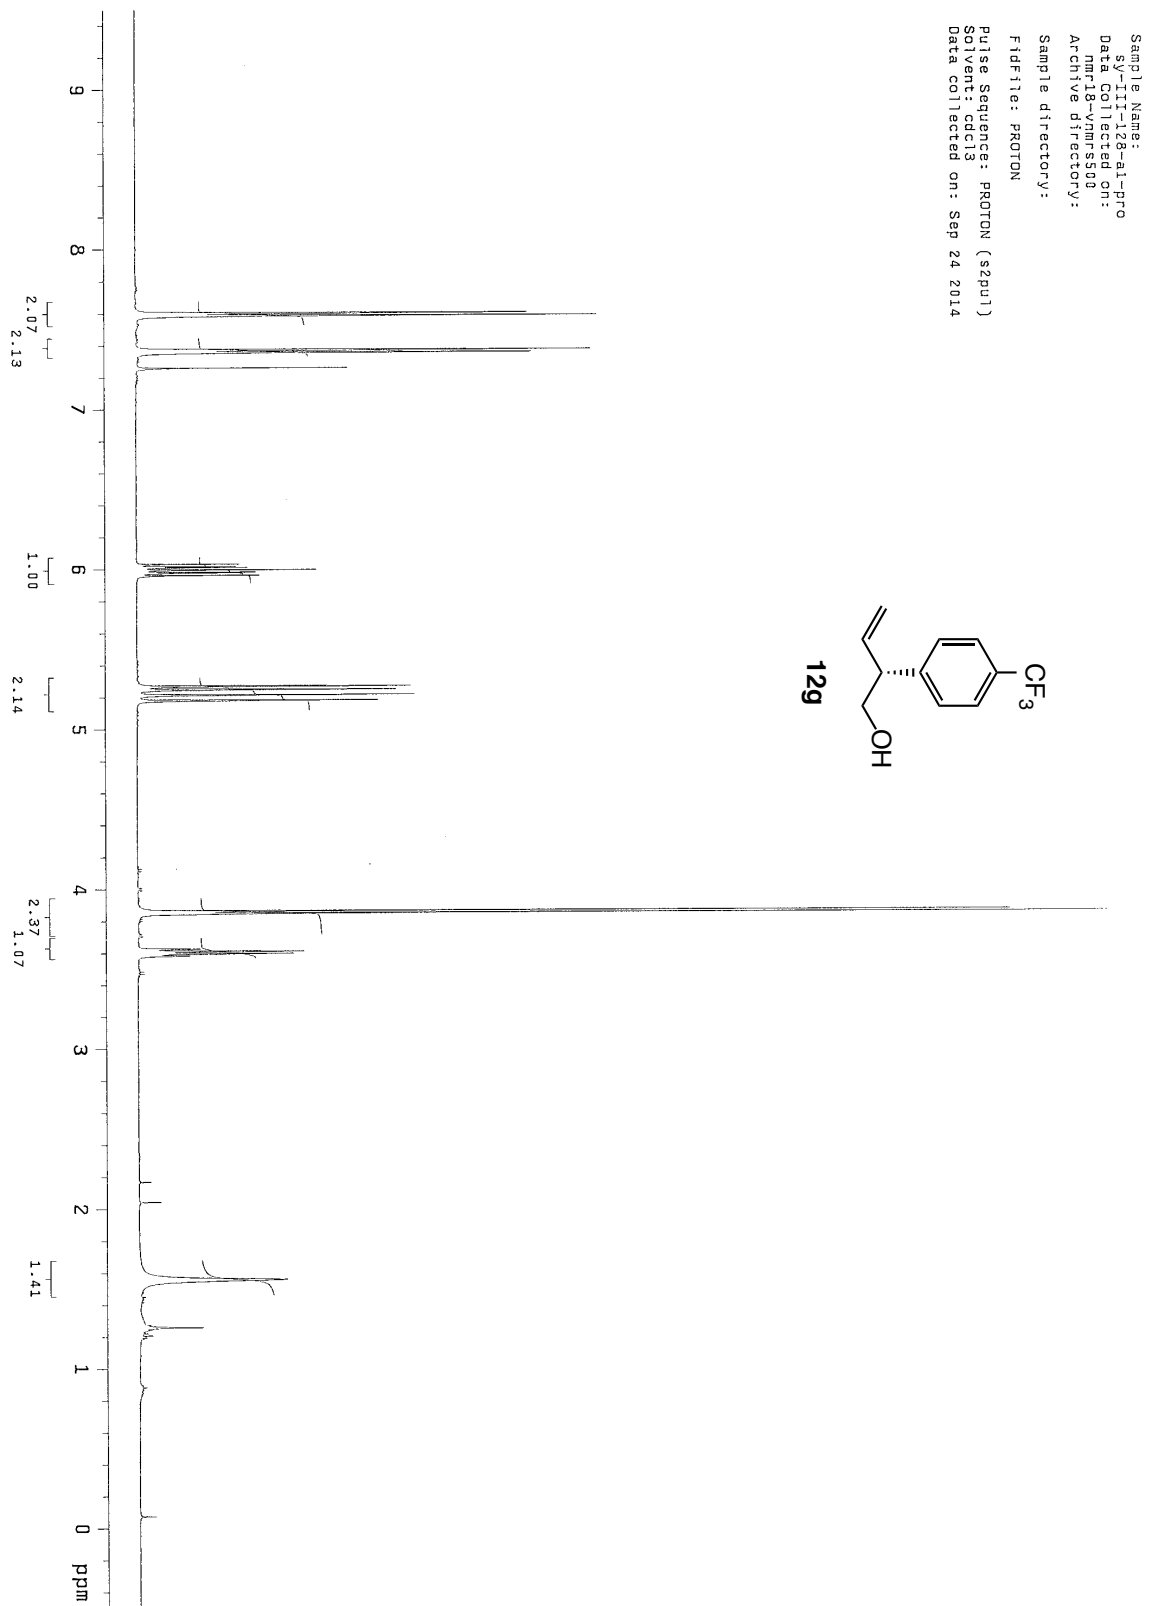

Sample Name: sy-11-123-at-pro  
Data Collected on: vnmr13-vnmrs400  
Archive directory:  
Sample directory:  
Fid file: CARBON  
Pulse Sequence: CARBON (zgpg1)  
Solvent: CDCl3  
Data collected on: Sep 23 2014

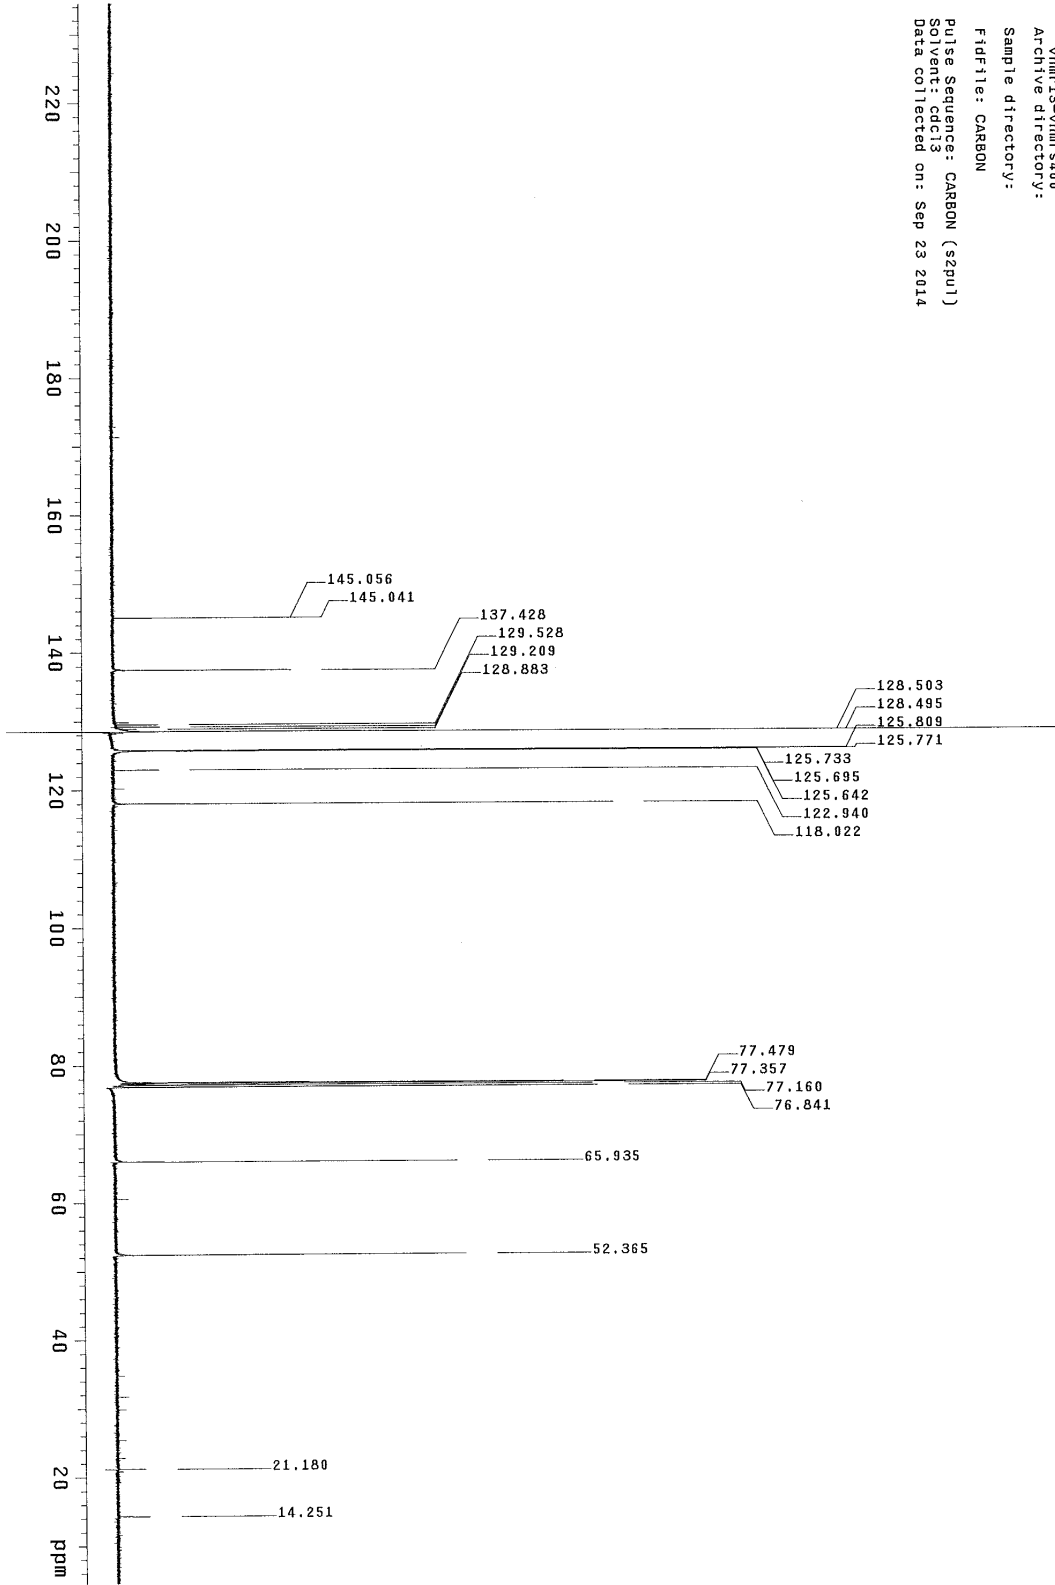

Sample Name: sy-III-no2-boh  
Data Collected on: nmr13-vnmrs400  
Archive directory:  
Sample directory:  
FIDFile: PROTON  
Pulse Sequence: PROTON (s2pu1)  
Solvent: cdcl3  
Data collected on: Jan 7 2016

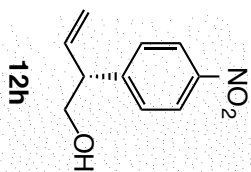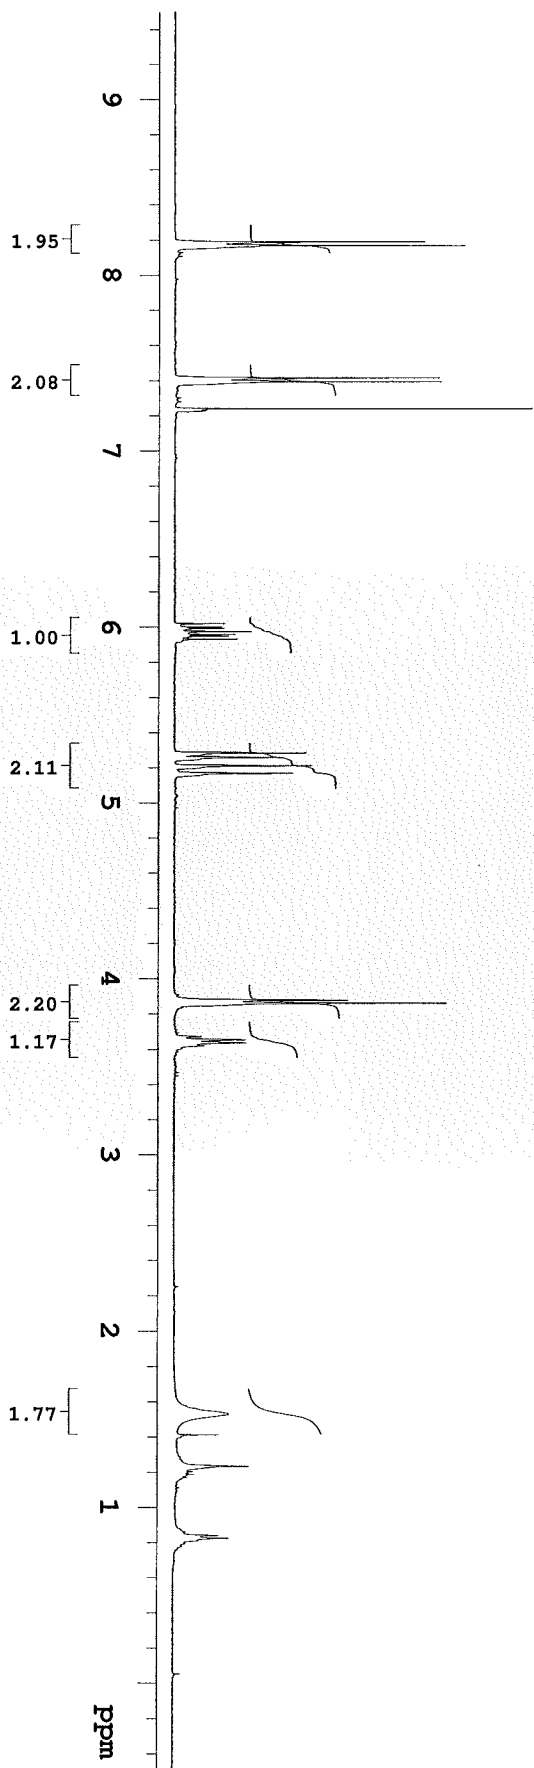

XCF-II-141-3

Sample Name:

sy-III-NO2-b\_OH\_

Data Collected on:

nmr19-vnmrs600

Archive directory:

Sample directory:

FidFile: CARBON

Pulse Sequence: CARBON (s2pu1)

Solvent: cdcl3

Data collected on: Jan 7 2016

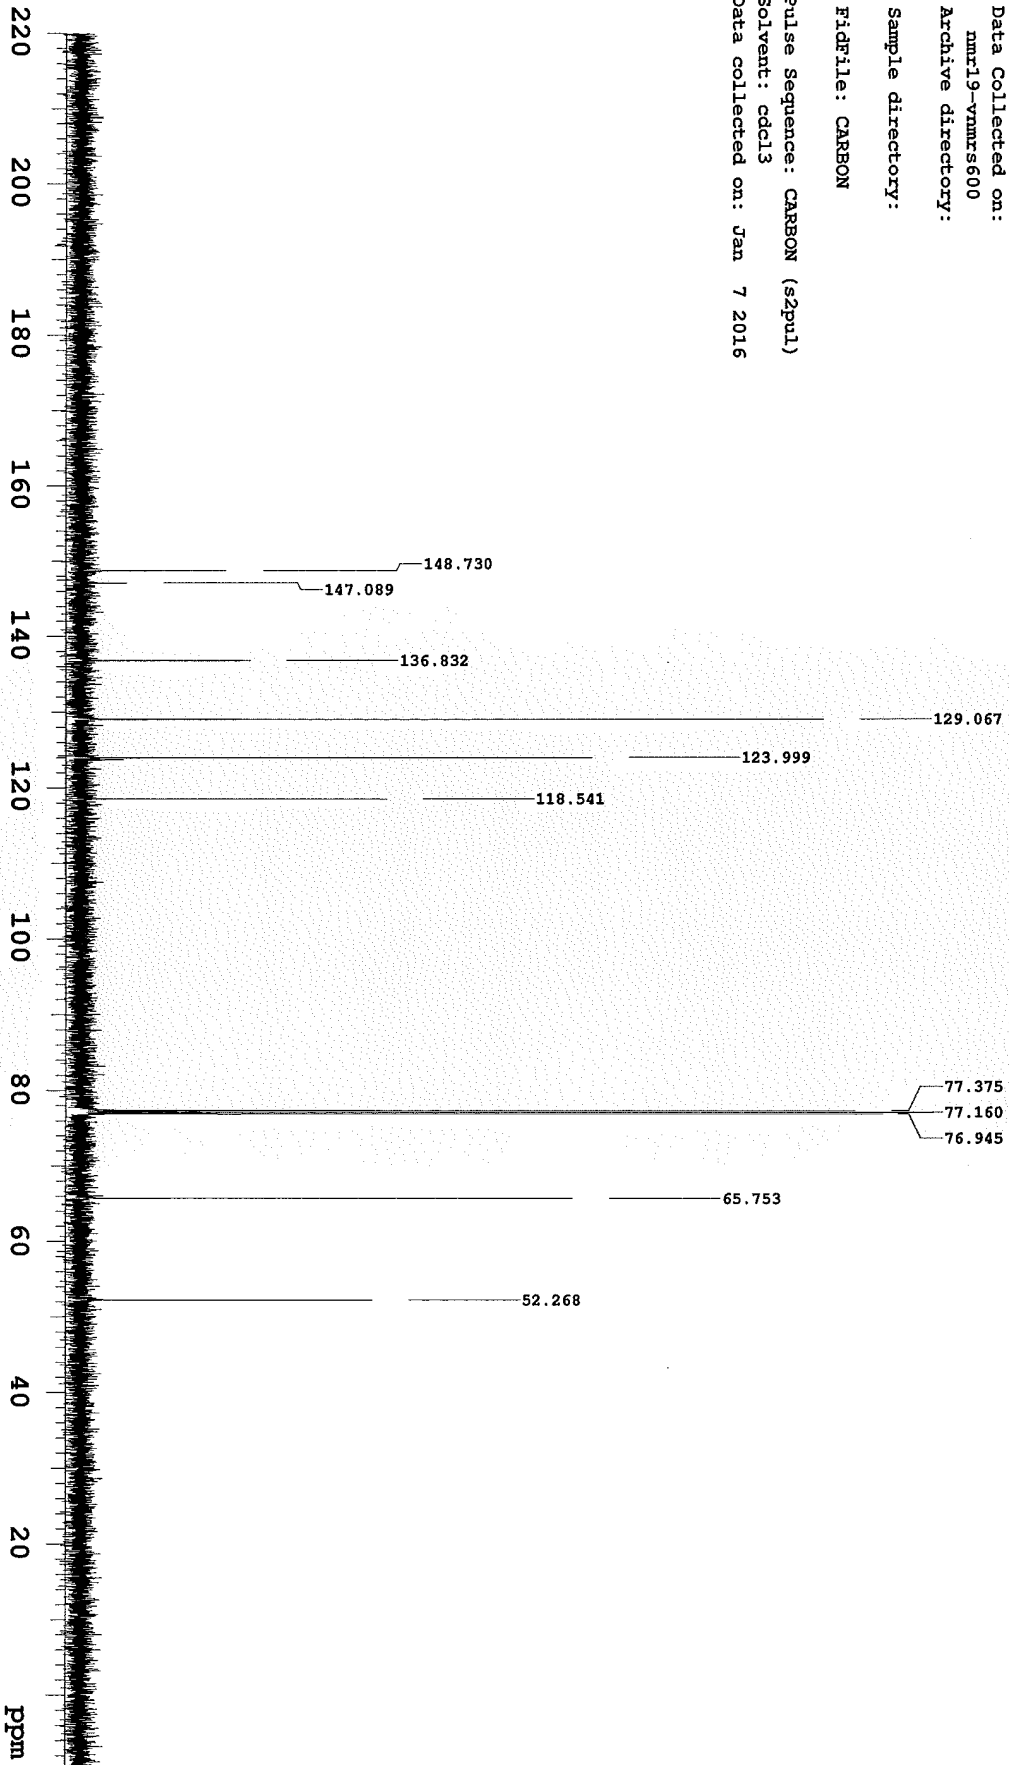

MOK-V-127A-1H, purified

Sample Name:

sy-III-239-b1-pro

Data Collected on:

ymmr13-ymmr400

Archive directory:

Sample directory:

FidFile: sy-III-239-b1-pro

Pulse Sequence: PROTON (s2pul)

Solvent: cdcl3

Data collected on: Oct 9 2015

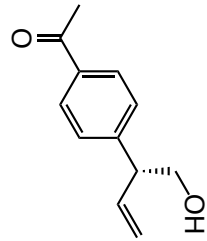

121

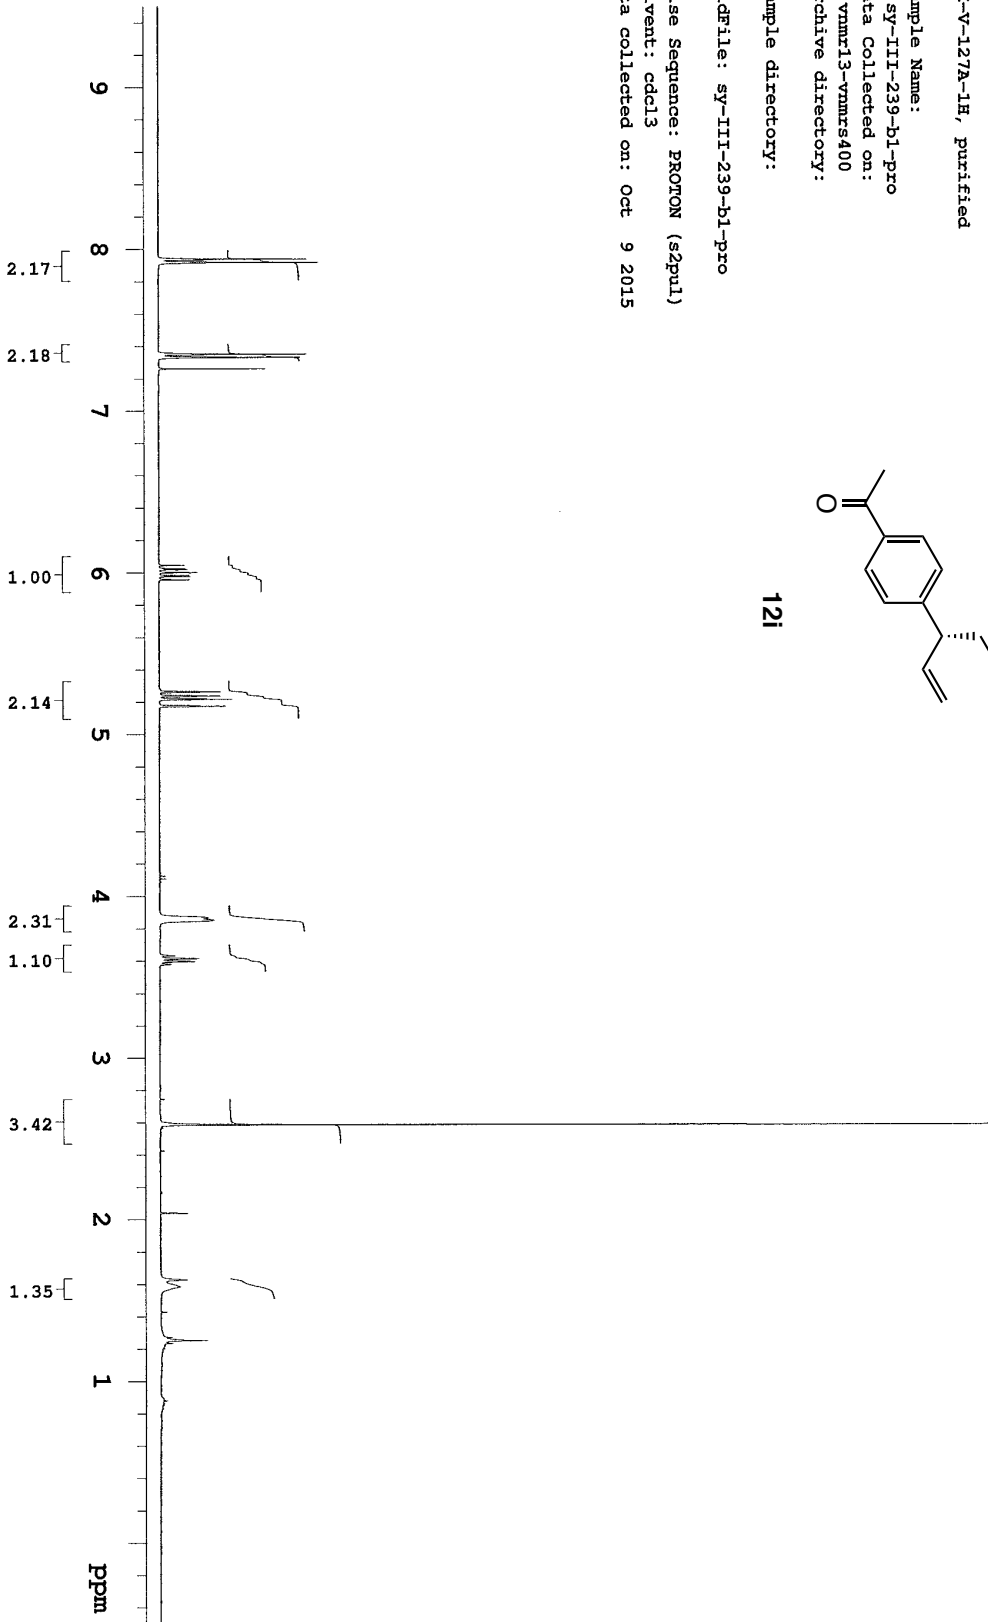



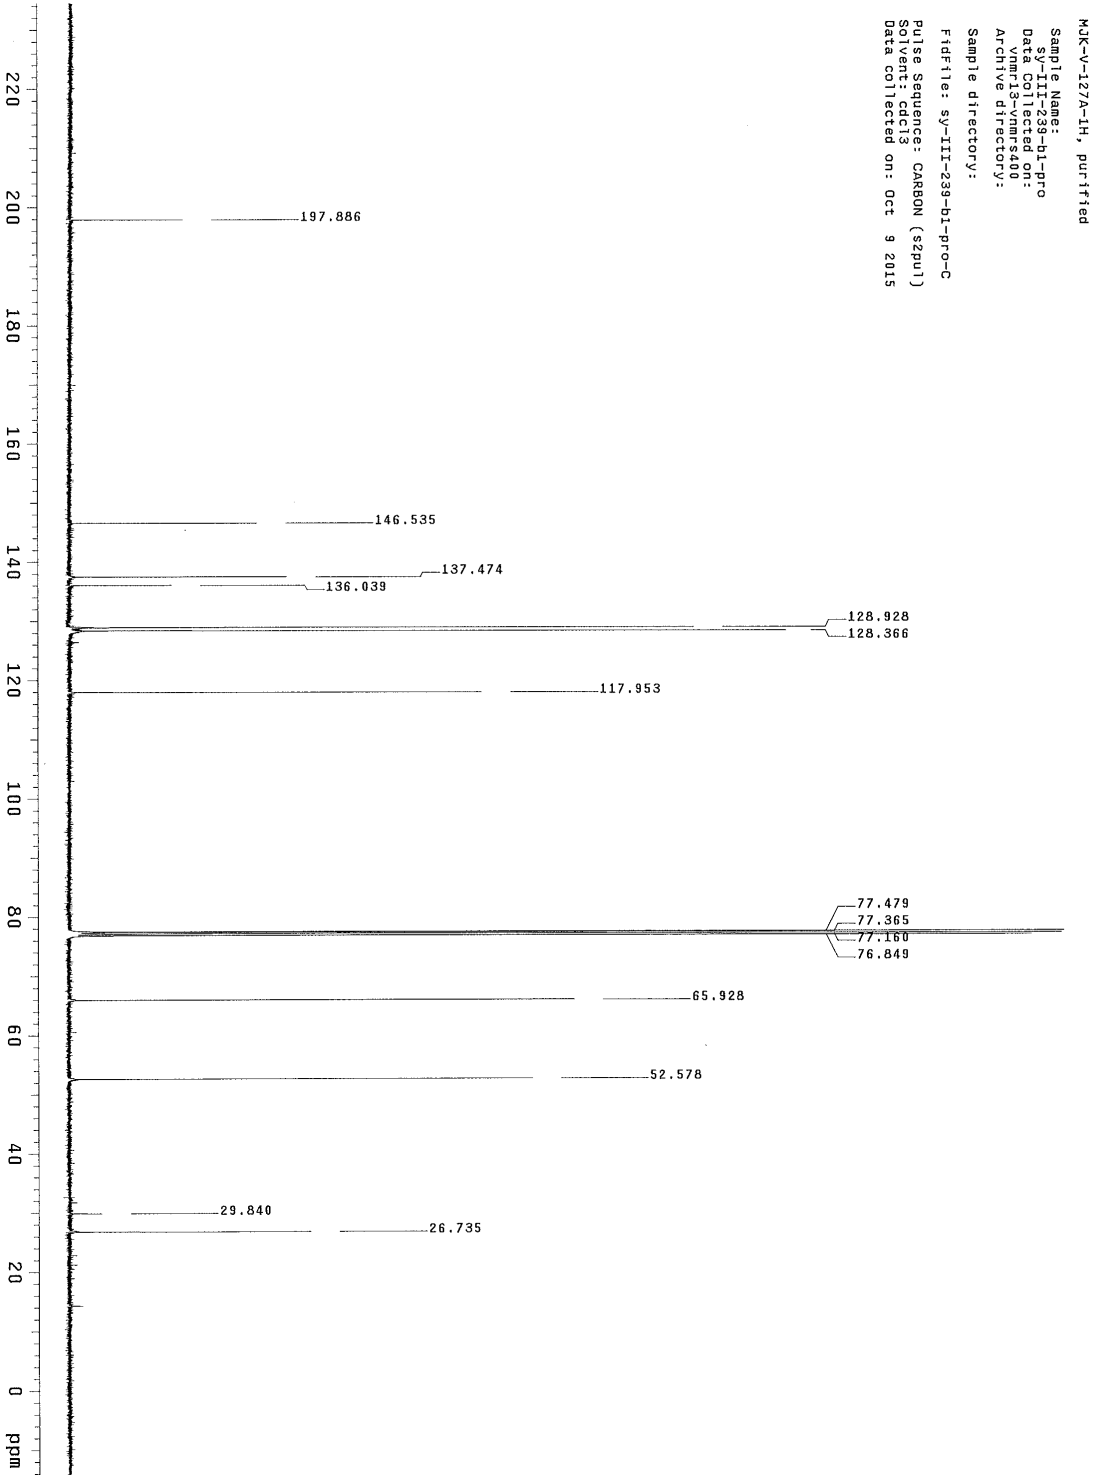

FV-I-264-13C  
E-Cinn Imine  
12/16/15

Sample Name:  
sy-FV-45-5me1-1h-11-229-01-Pr2  
Data Collected on:  
nmr19-vnmrs600  
Archive directory:

Sample directory:

FidFile: PROTON

Pulse Sequence: PROTON (s2pu1)

Solvent: cdcl3

Data collected on: Dec 16 2015

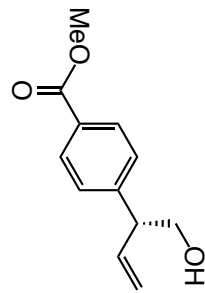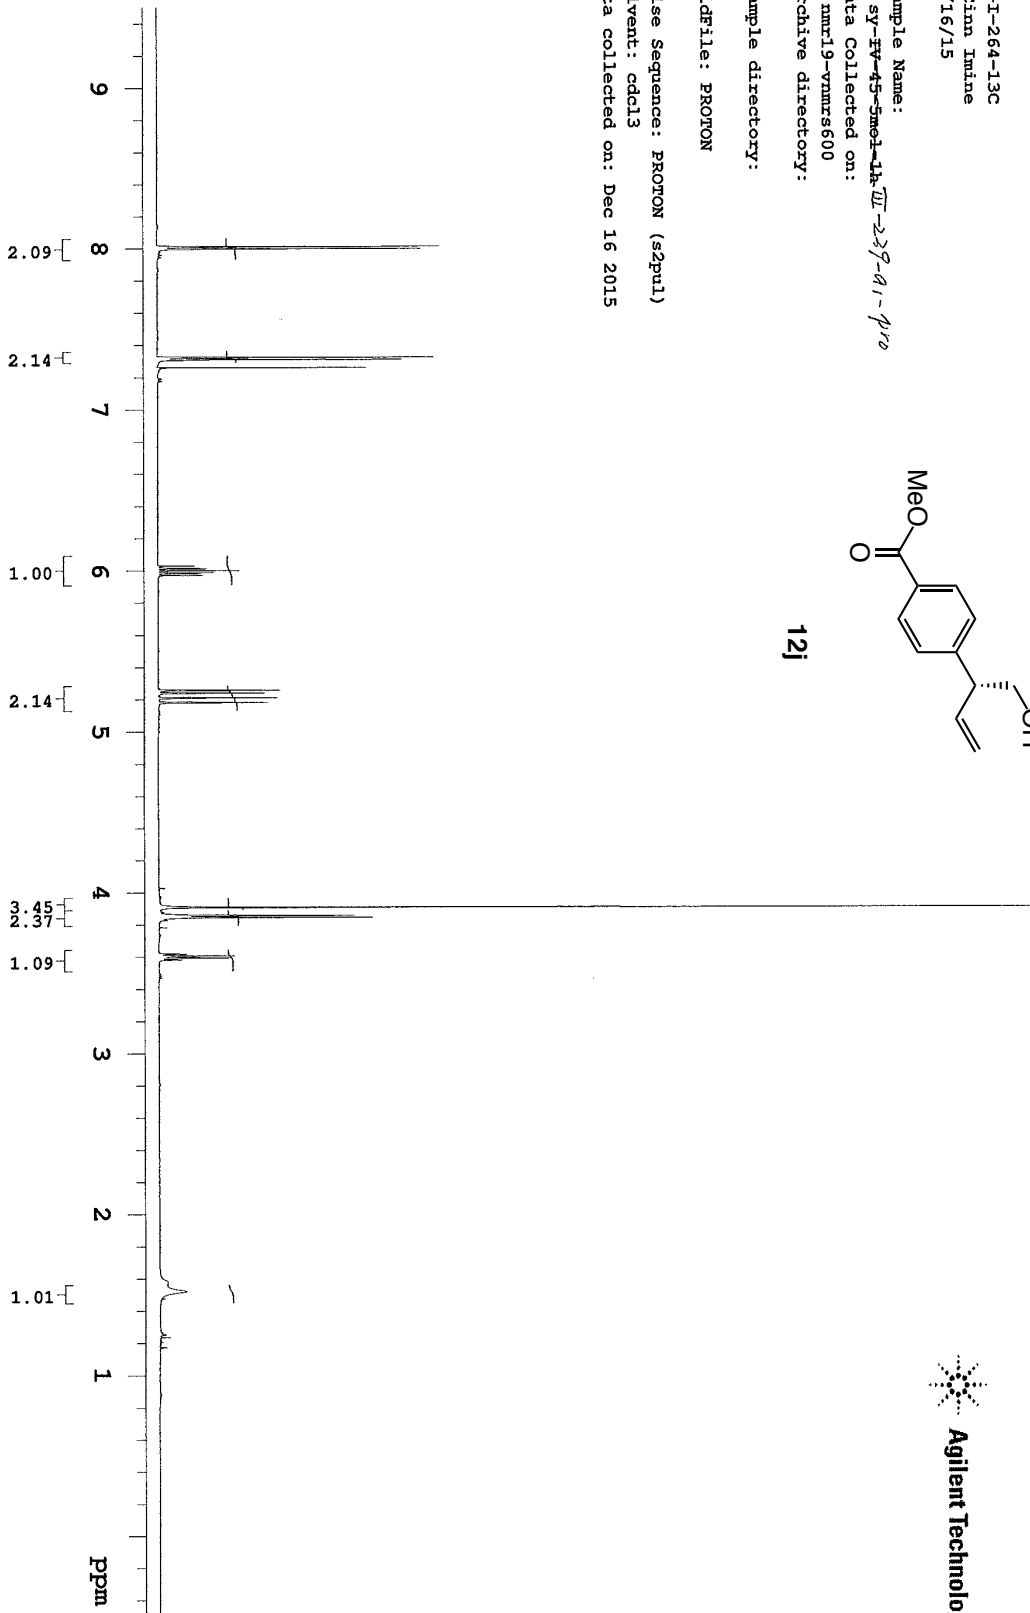

FV-I-264-13C  
H-Cinn Imine  
12/16/15

Sample Name:  
sy-III-239-a1-pro-C  
Data Collected on:  
mmr19-vmmr600  
Archive directory:

Sample directory:

FidFile: CARBON

Pulse Sequence: CARBON (s2pu1)  
Solvent: cdcl3  
Data collected on: Dec 16 2015

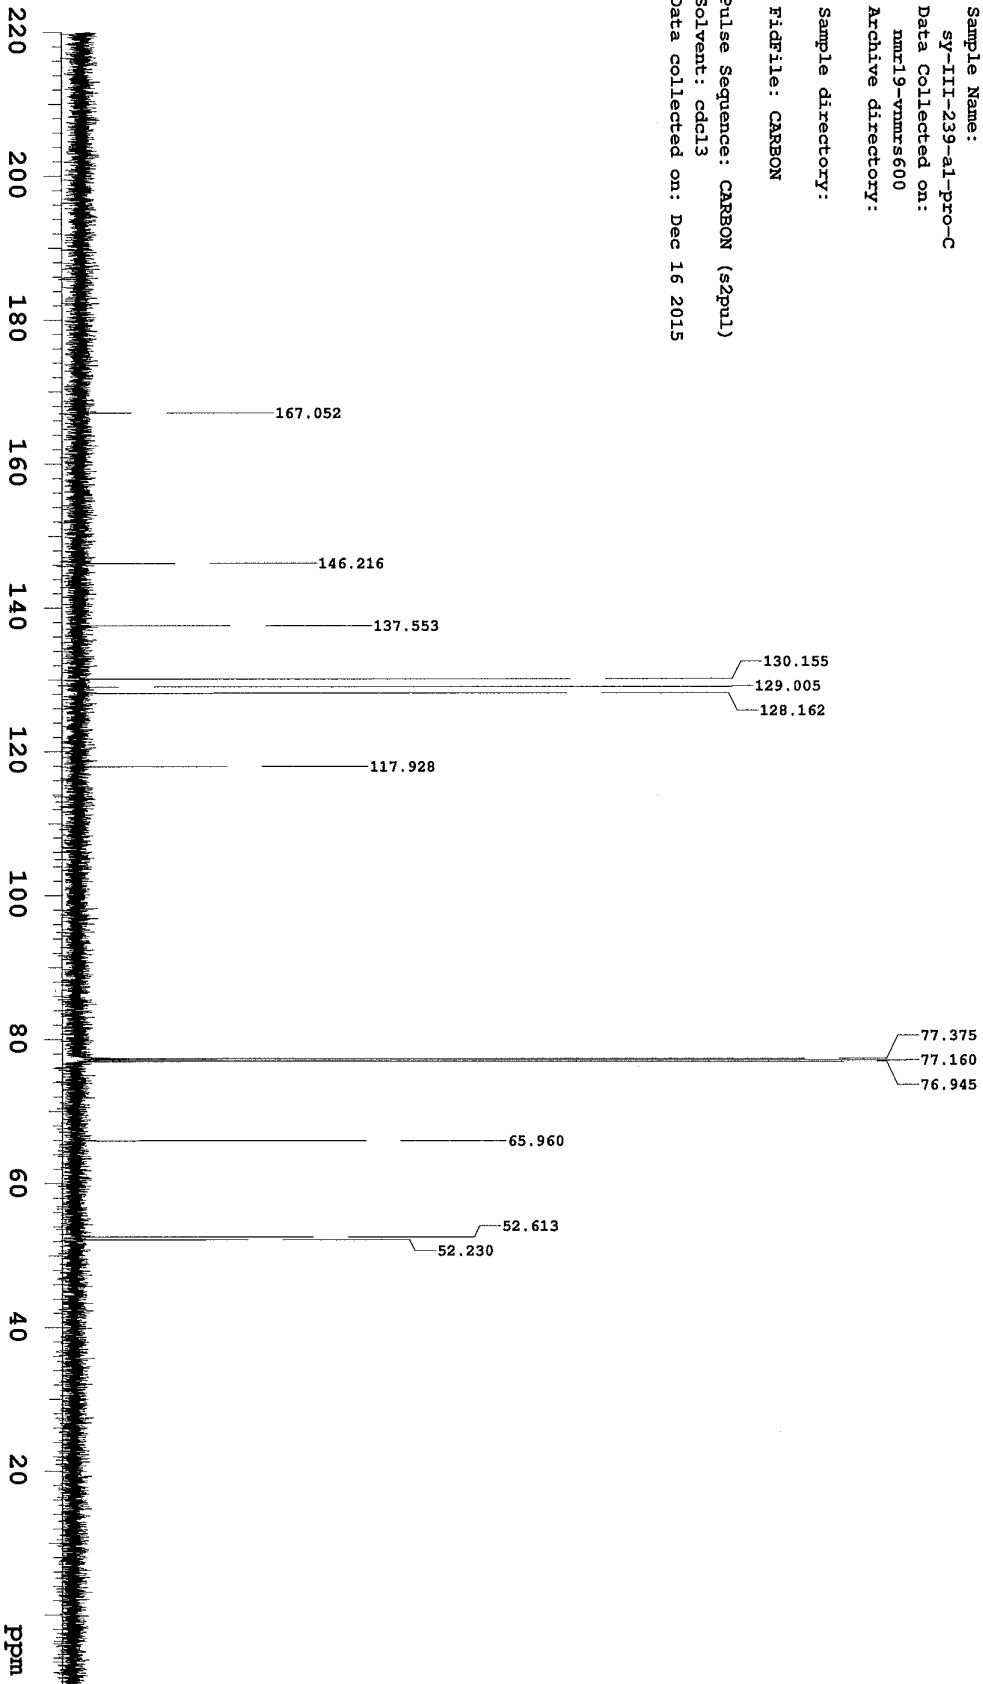

Sample Name: SV-T11-128-cl-pro  
Data Collected on: vnmr13-vnmrs480  
Archive directory: /home/ahh  
Sample directory: qin-1-18-cat-to1-h\_20140922\_01  
FID file: PROTON  
Pulse Sequence: PROTON (s2pu1)  
Solvent: cdcl3  
Data collected on: Sep 22 2014

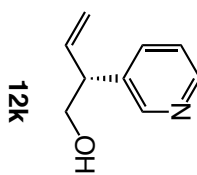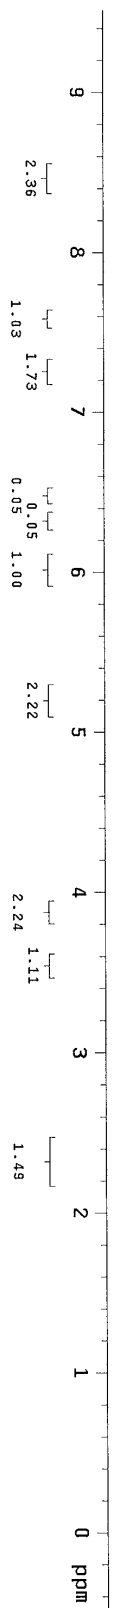

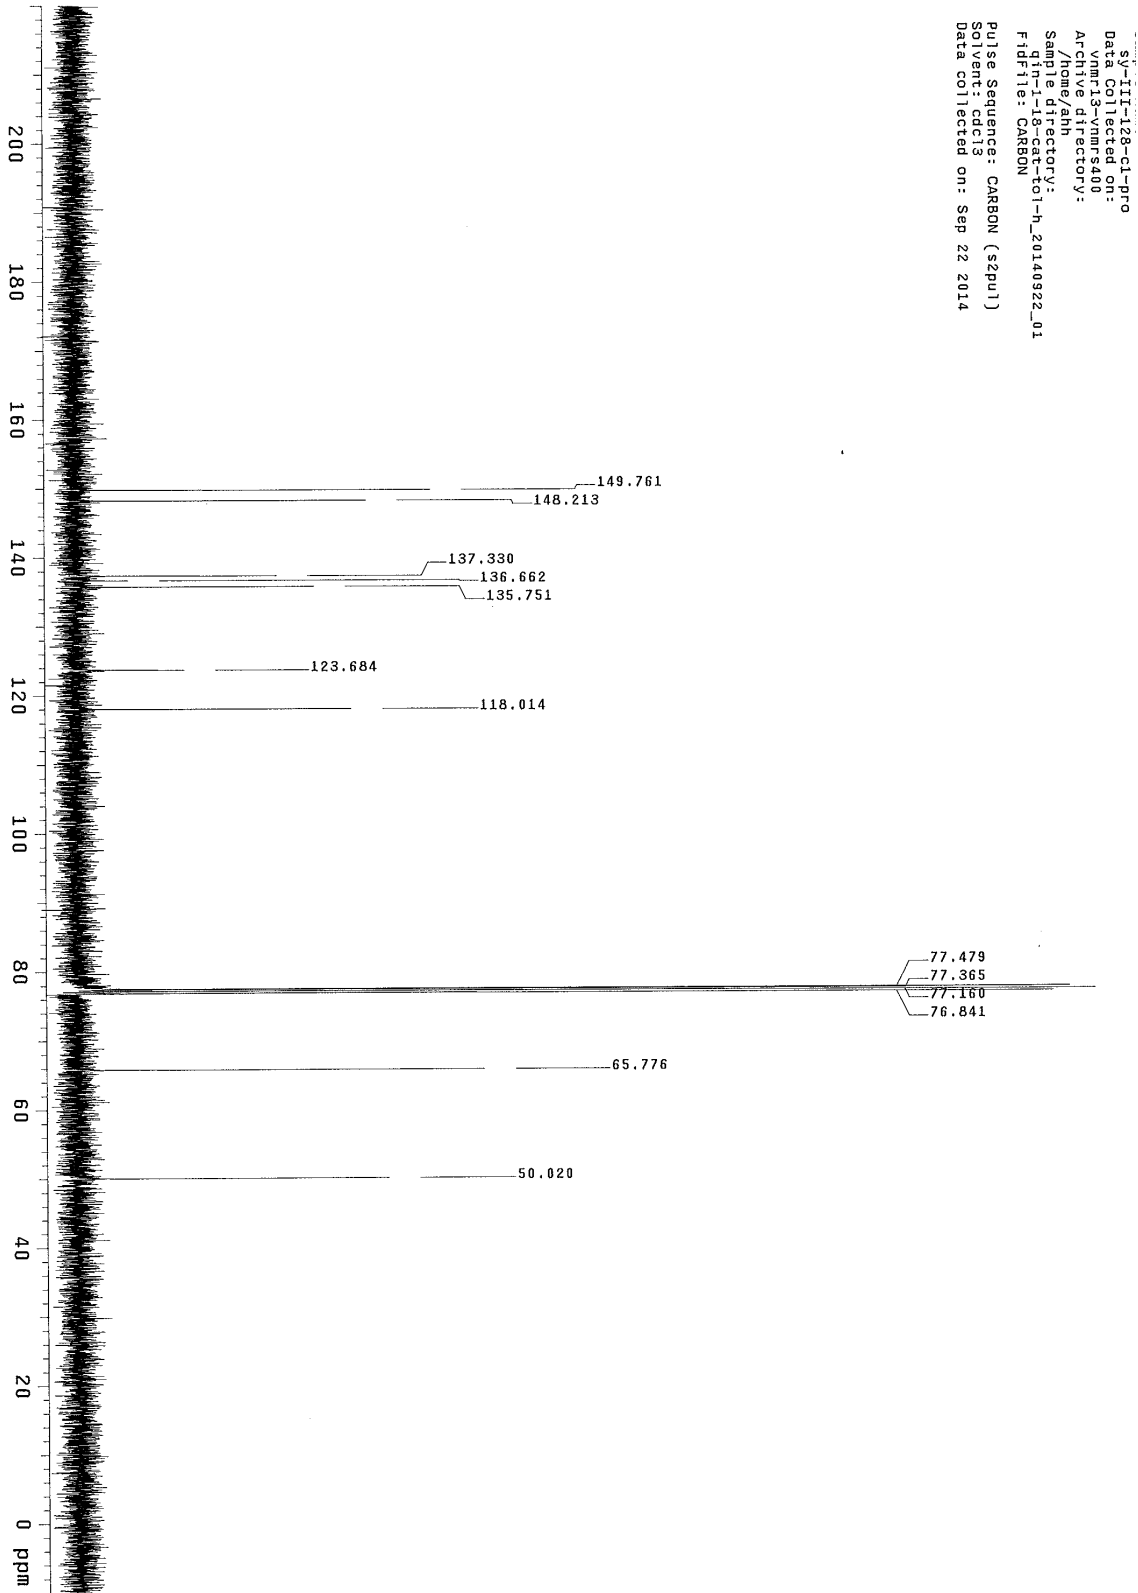

SV-IT-128-cl-pro  
Data collected on: Vnmr13-vnmrs400  
Archive directory: /home/ahh  
Sample directory: qh-1-18-cat-tot-h\_20140922\_01  
FidFile: CARBON  
Pulse Sequence: CARBON (szpu1)  
Solvent: cdcl3  
Data collected on: Sep 22 2014

Sample Name: sy-III-128-d2-pro  
Data Collected on: 4/11/2014 13:40  
Acquire directory:  
Sample directory:  
FID file: sy-III-128-d2-pro  
Pulse Sequence: PROTON (s2pu1)  
Solvent: cdcl3  
Data collected on: Sep 23 2014

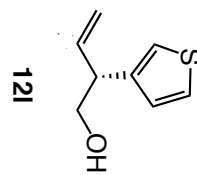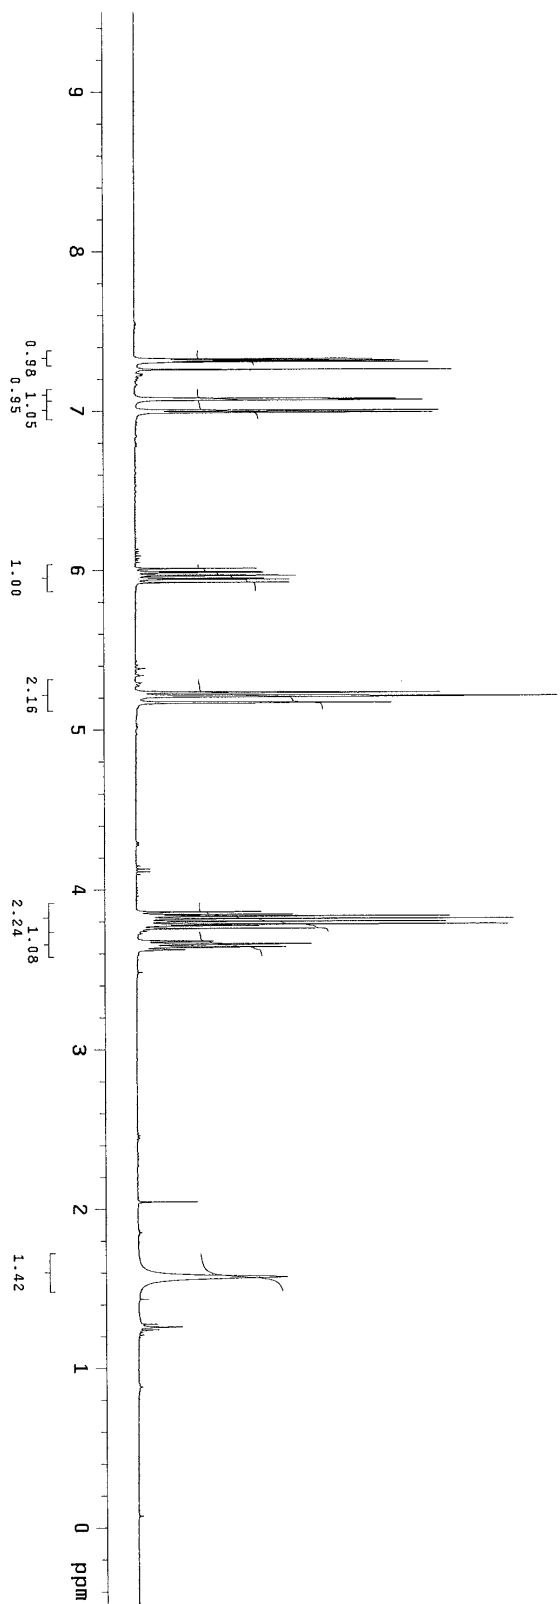

Sample Name: sy-III-128-d2-pro  
Data Collected on: vnmr13-vnmrs400  
Archive directory:  
Sample directory:  
Fid file: CARBON  
Pulse Sequence: CARBON (s2pu1)  
Solvent: cdcl3  
Data Collected on: Sep 23 2014

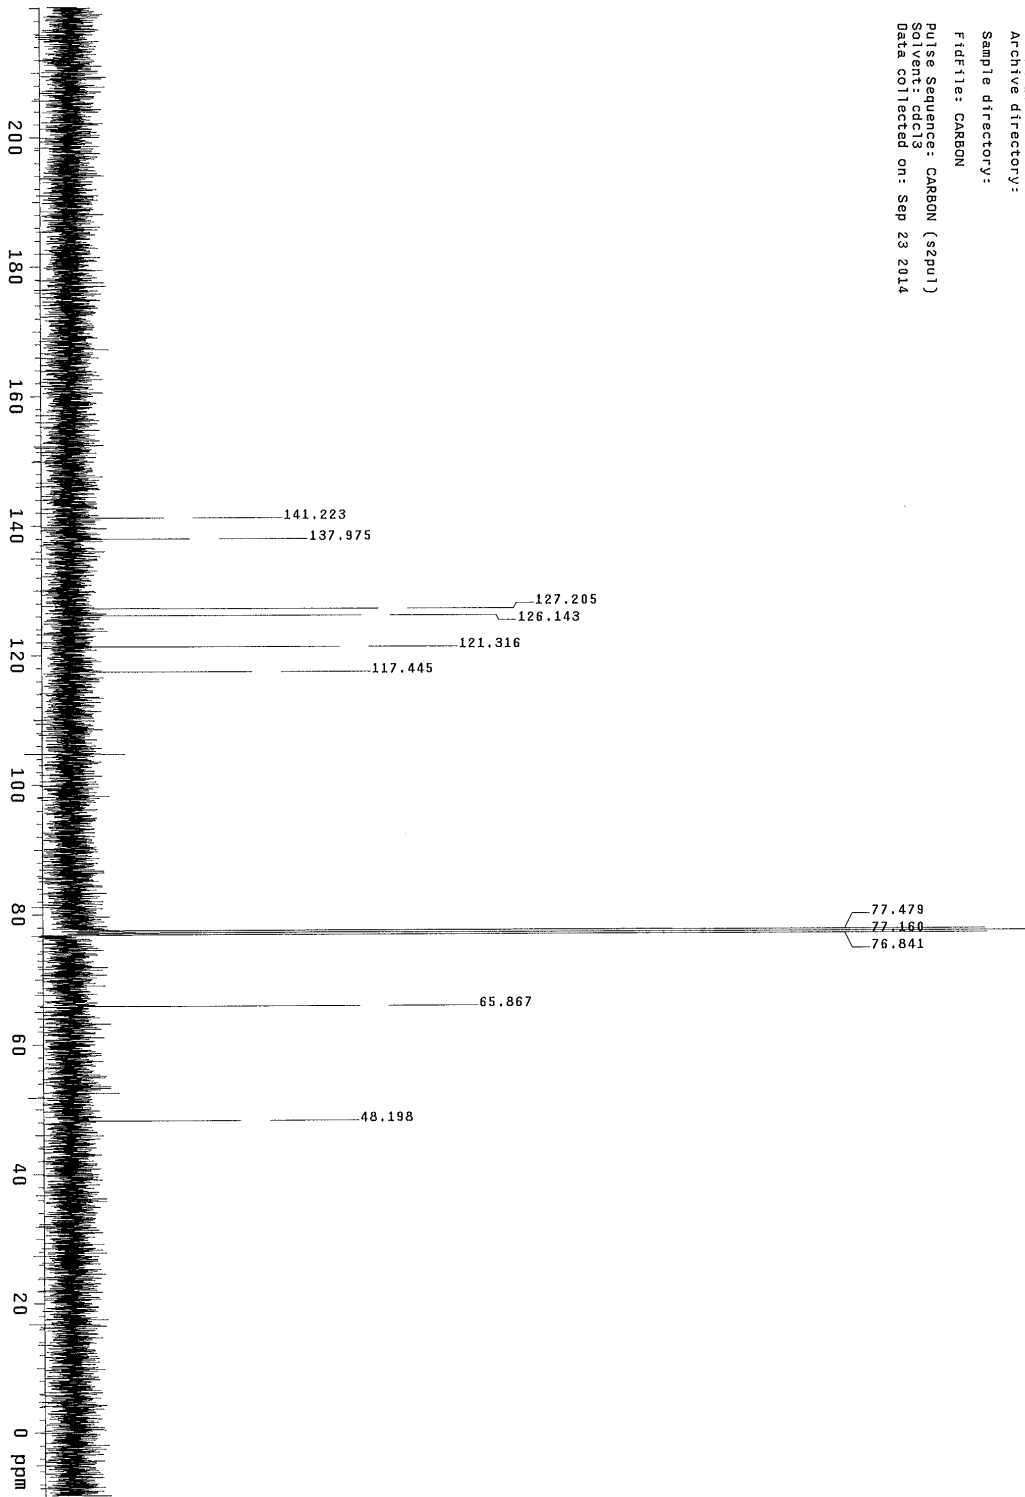

STANDARD FLUORINE PARAMETERS

Sample Name: SY-IT-120-C2-OX1-pro  
Data Collected on: Vnmr13-Vnmrs400  
Archive directory:  
Sample directory:  
Fidfile: PROTON  
Pulse Sequence: PROTON (szpu1)  
Solvent: cdcl3  
Data collected on: Sep 3 2014

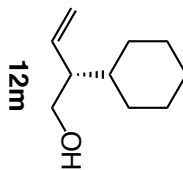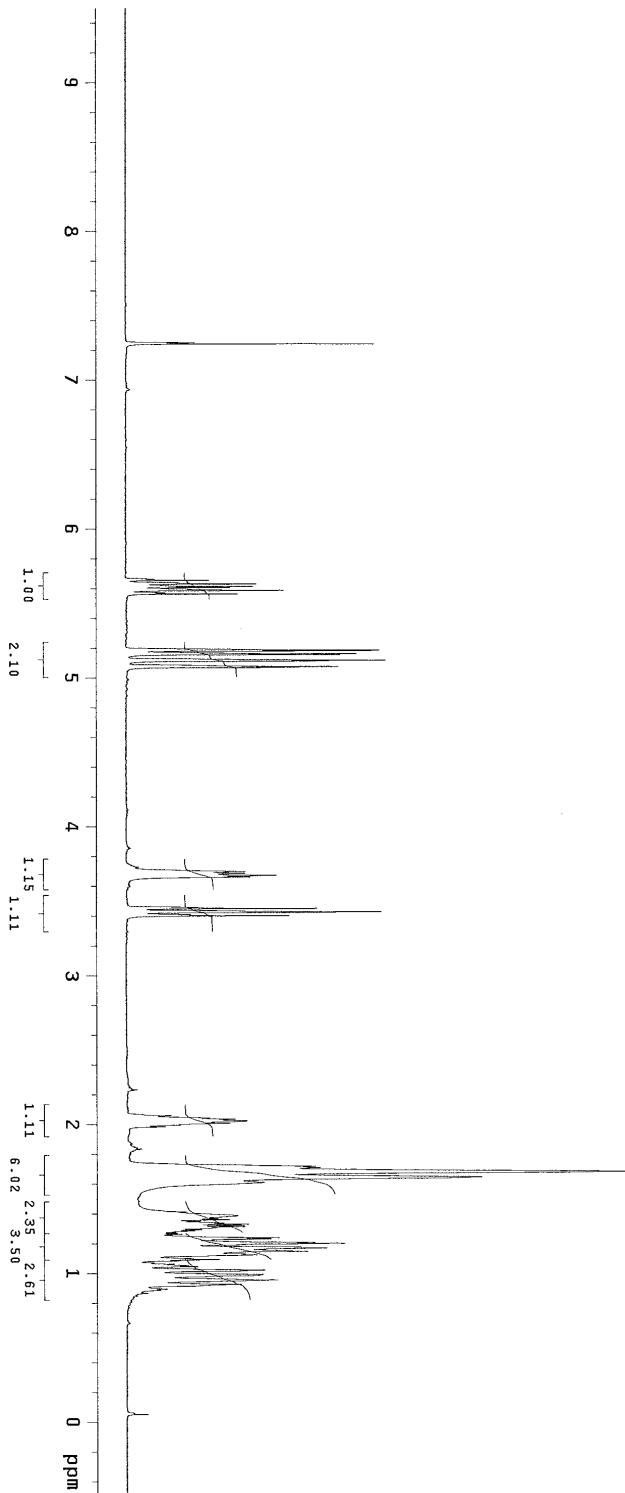



STANDARD FLUORINE PARAMETERS  
Sample Name: SV-IT-120-CI-oxi-pro  
Data Collected on: vnmr13-vnmr-s400  
Archive directory:  
Sample directory:  
FidFile: CARBON  
Pulse Sequence: CARBON (szpu1)  
Solvent: cdcl3  
Data collected on: Sep 3 2014

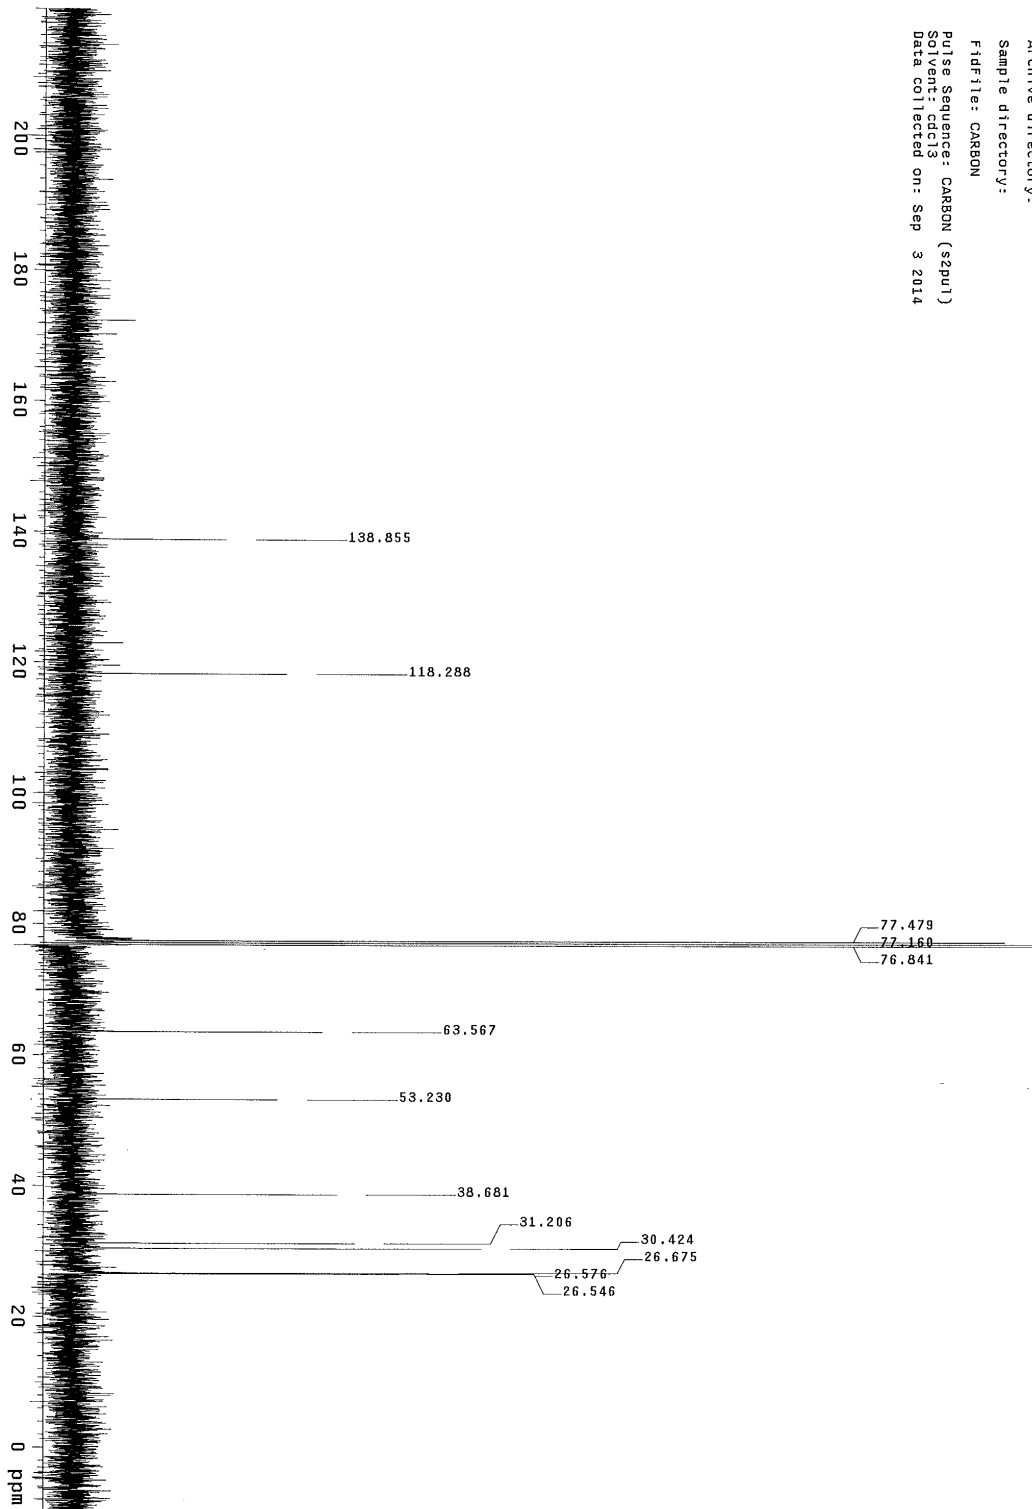

Sample Name: **SI-TIT-12-ai-pro**  
Data Collected on: **vmr13-vmr540**  
Archive directory:  
Sample directory:  
Fid file: **PROTON**  
Pulse Sequence: **PROTON (szpu1)**  
Solvent: **cdcl3**  
Data collected on: **Sep 4 2014**

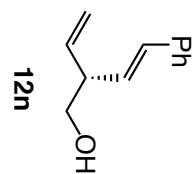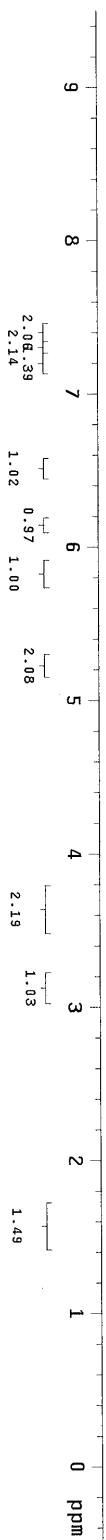

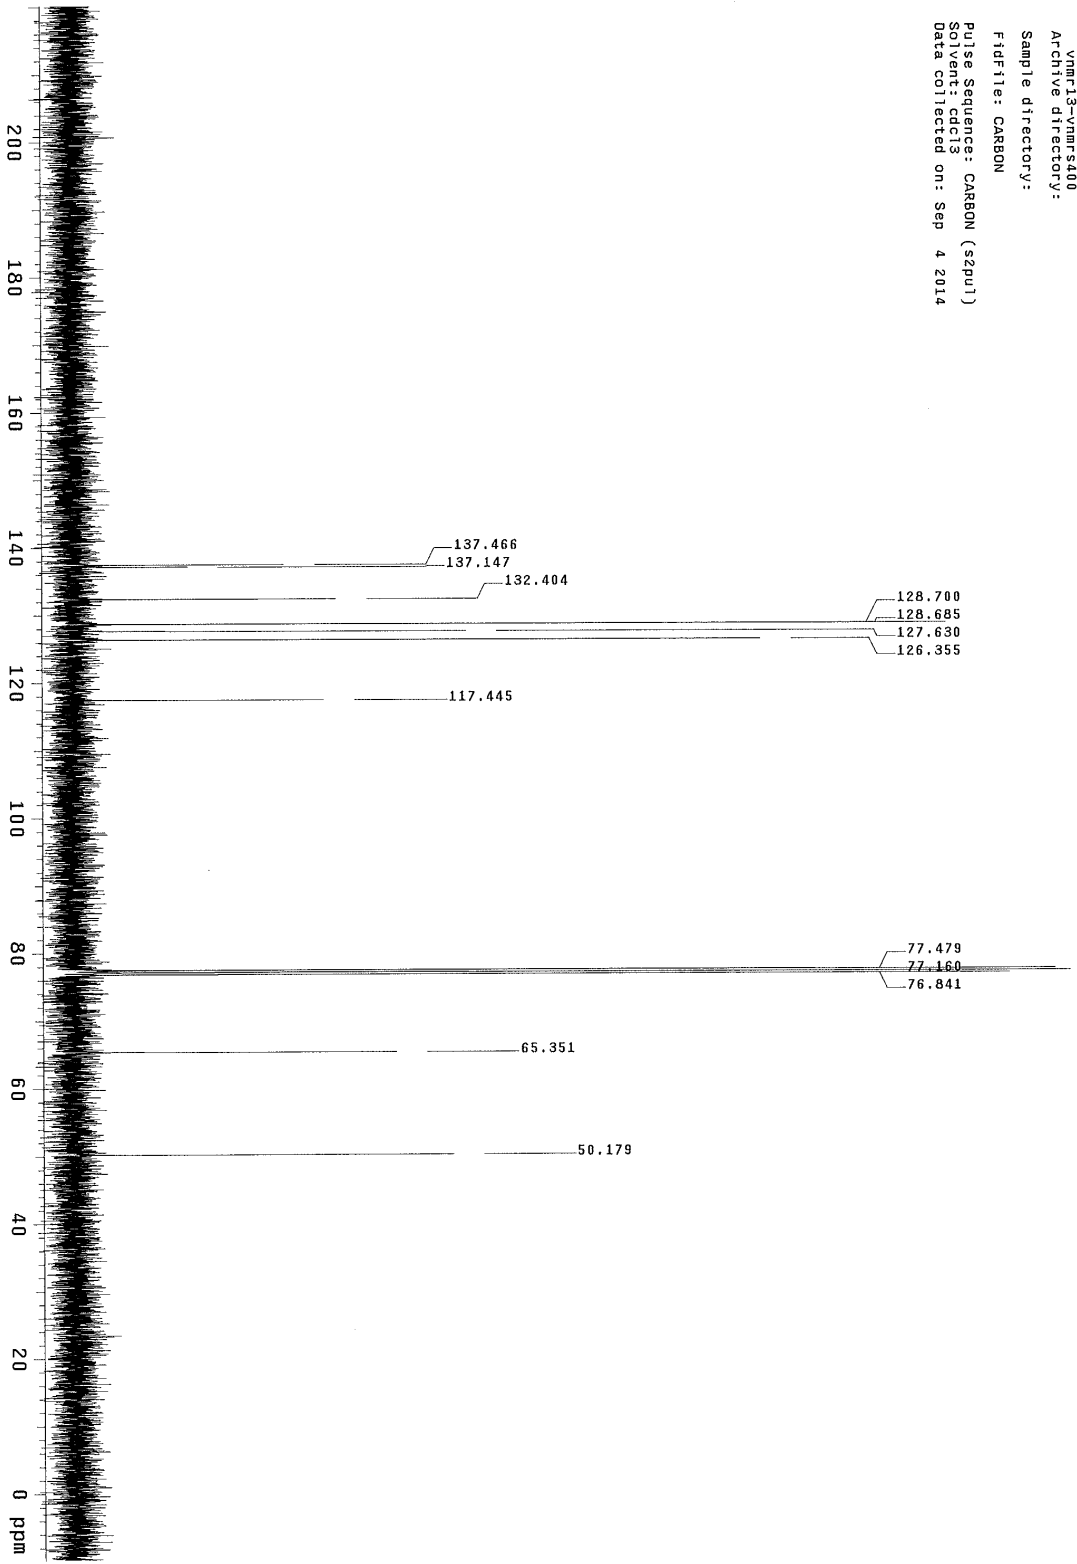

Sample Name: sy-ii-12-a1-pro  
Data Collected on: vnmr-13-vnmr/s400  
Archive directory:  
Sample directory:  
Fidfile: CARBON  
Pulse Sequence: CARBON (szpu1)  
Solvent: cdcl3  
Data collected on: Sep 4 2014

HJ-IX-59-crudes5  
Jan.07.16

Sample Name:  
sy-III-Simeph-boh  
Data Collected on:  
nmr13-vnmrs400  
Archive directory:

Sample directory:

FidFile: PROTON

Pulse Sequence: PROTON (s2pu1)  
Solvent: cdcl3  
Data collected on: Jan 7 2016

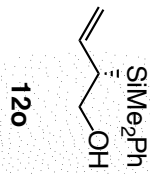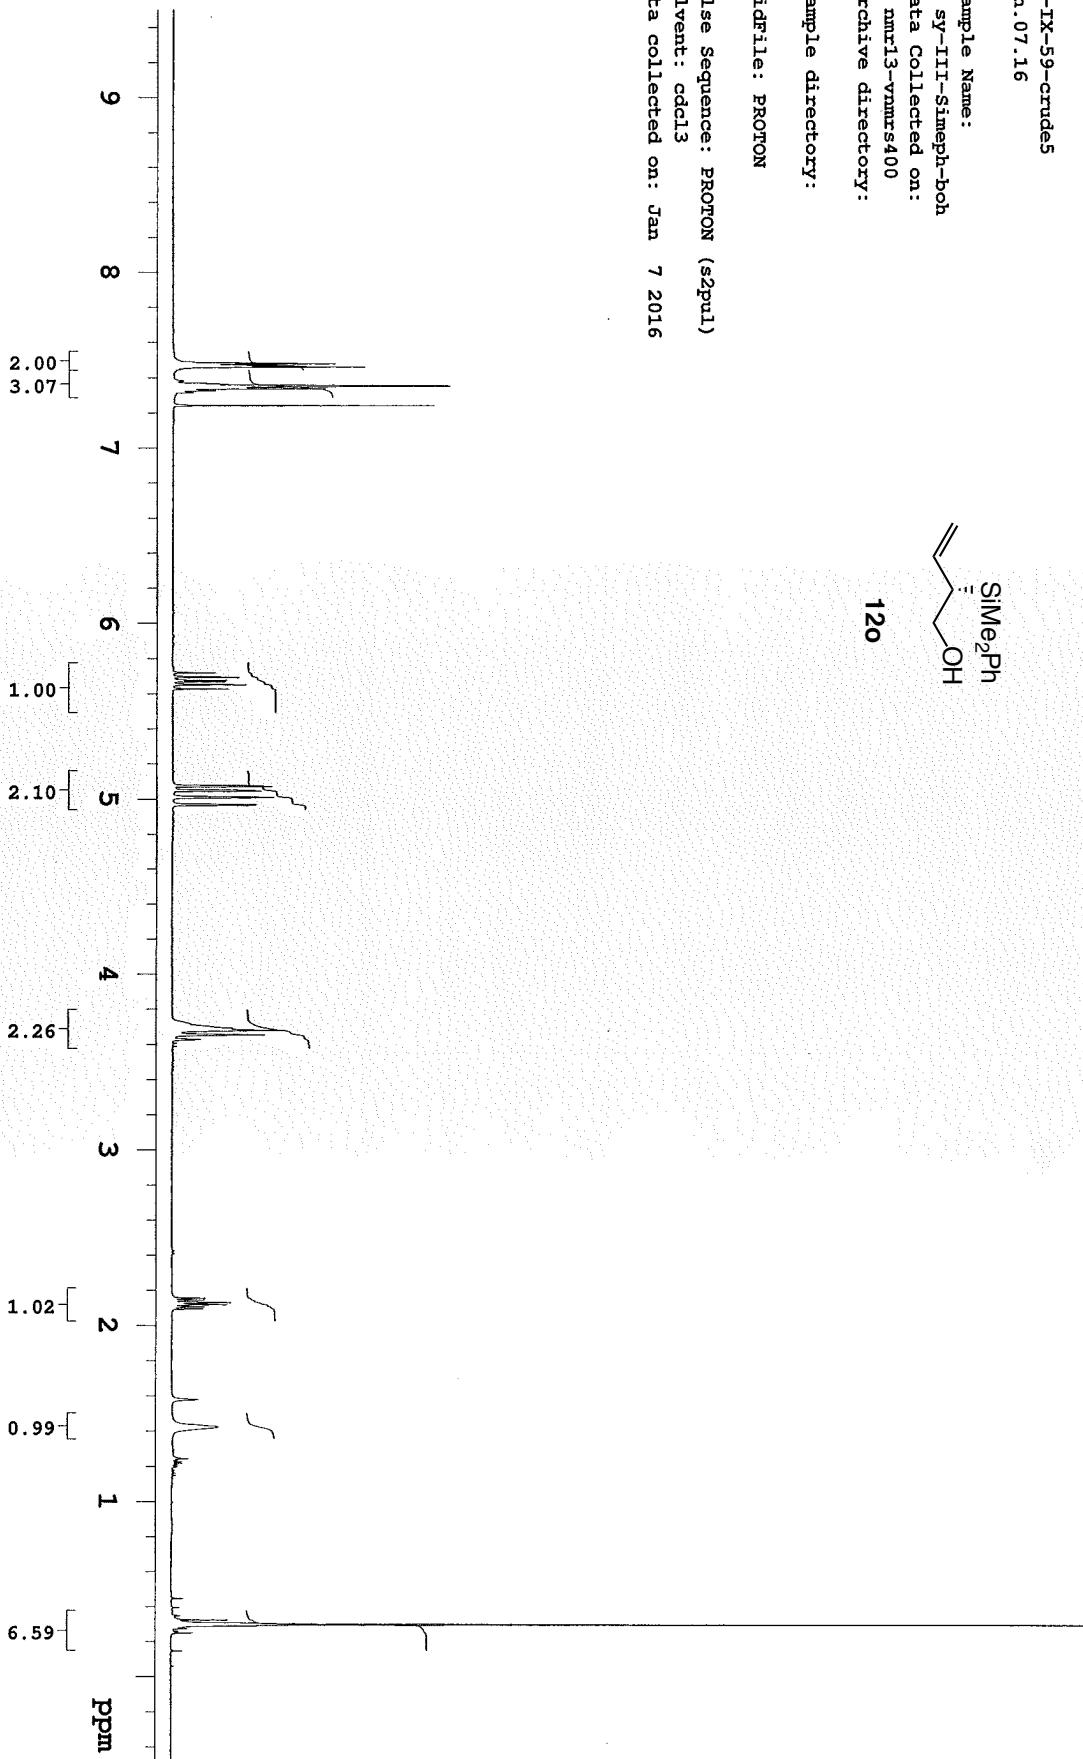

sv-II-120-d1-pro  
Data Collected on:  
vnmr13-vnmrs400  
Archive directory:  
Sample directory:  
Fidfile: CARBON  
Pulse Sequence: CARBON (s2pu1)  
Solvent: cdc13  
Data collected on: Sep 4 2014

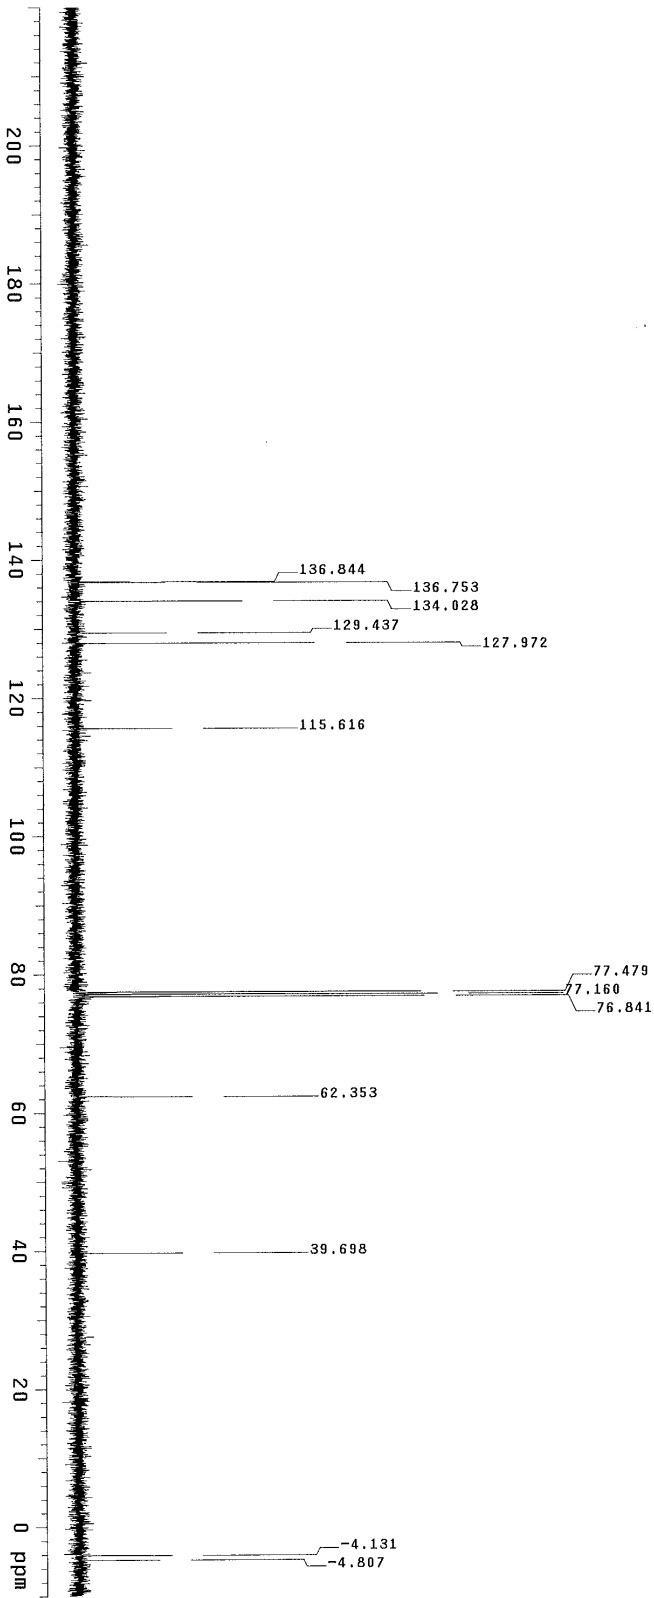

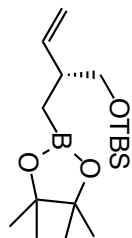

12p

Sample Name: sy-IV-62-pro  
Data Collected on: nmr13-vmmrs400  
Archive directory:  
Sample directory:  
FidFile: PROTON  
Pulse Sequence: PROTON (s2pu1)  
Solvent: cdcl3  
Data collected on: Jan 1 2016

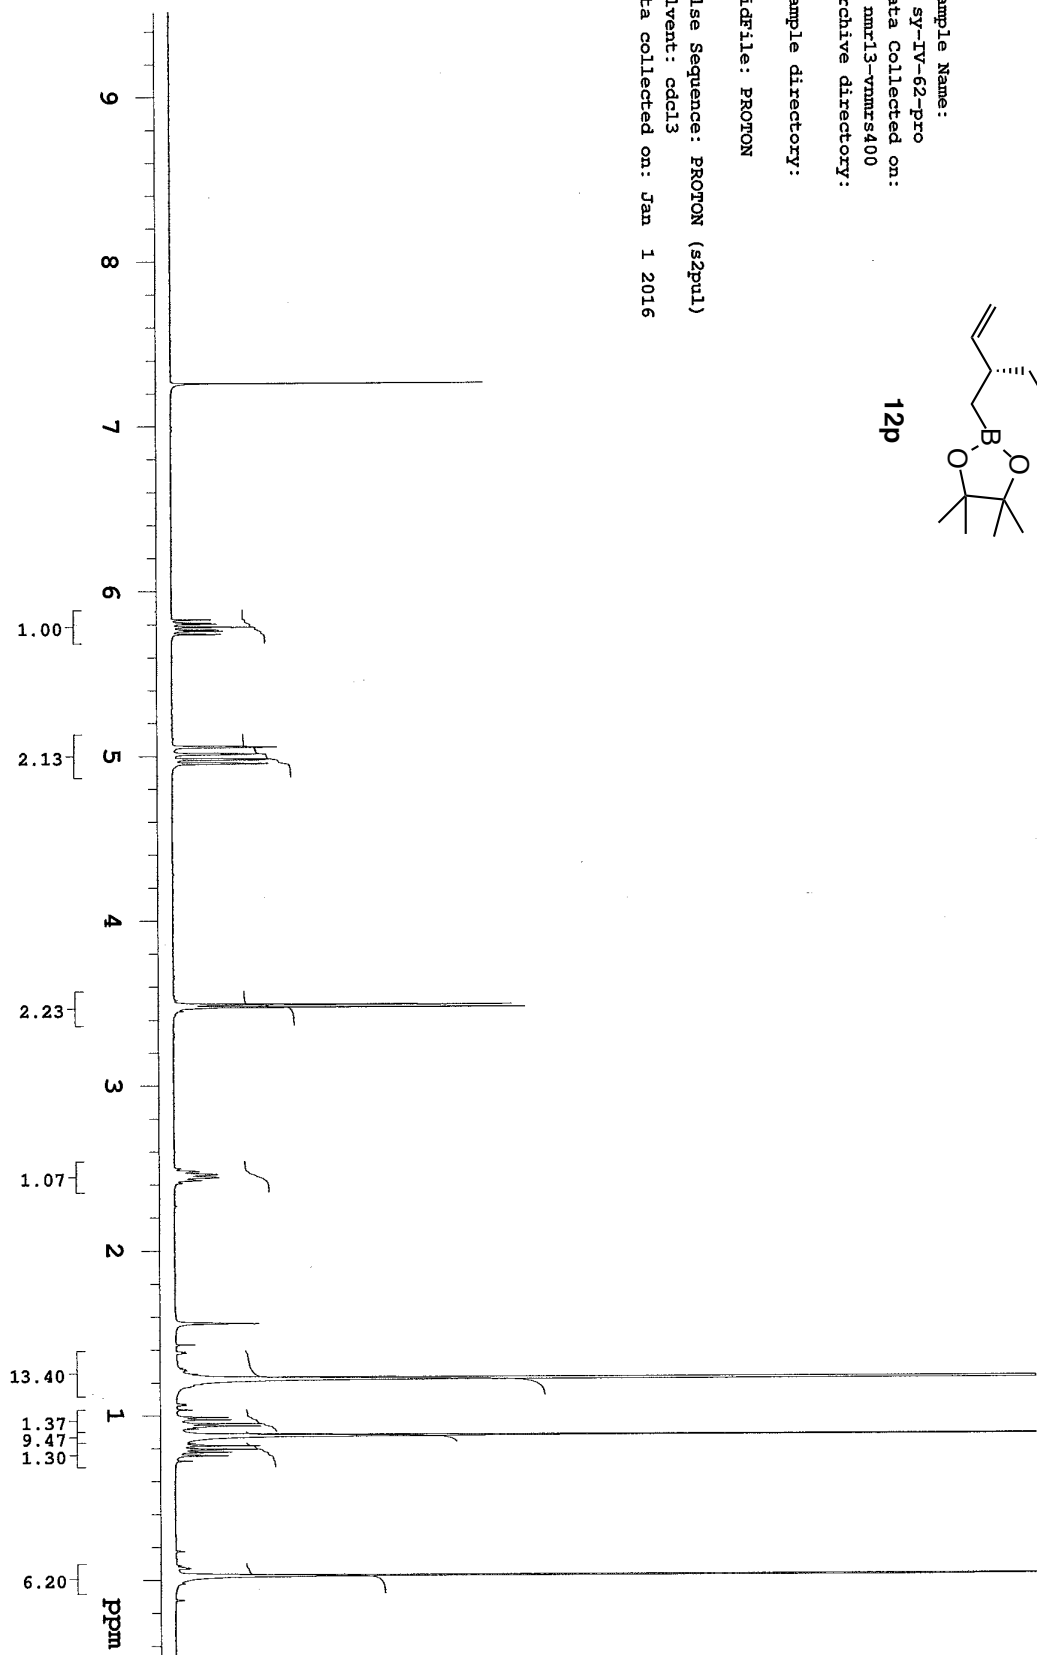

NM-6-236crude2weeks

Sample Name:

Data Collected on:  
nmr19-vnmr5600

Archive directory:

Sample directory:

F1DF1le: CARBON  
Pulse Sequence: CARBON (s2pu1)  
Solvent: cdcl3  
Data collected on: Jan. 4 2016

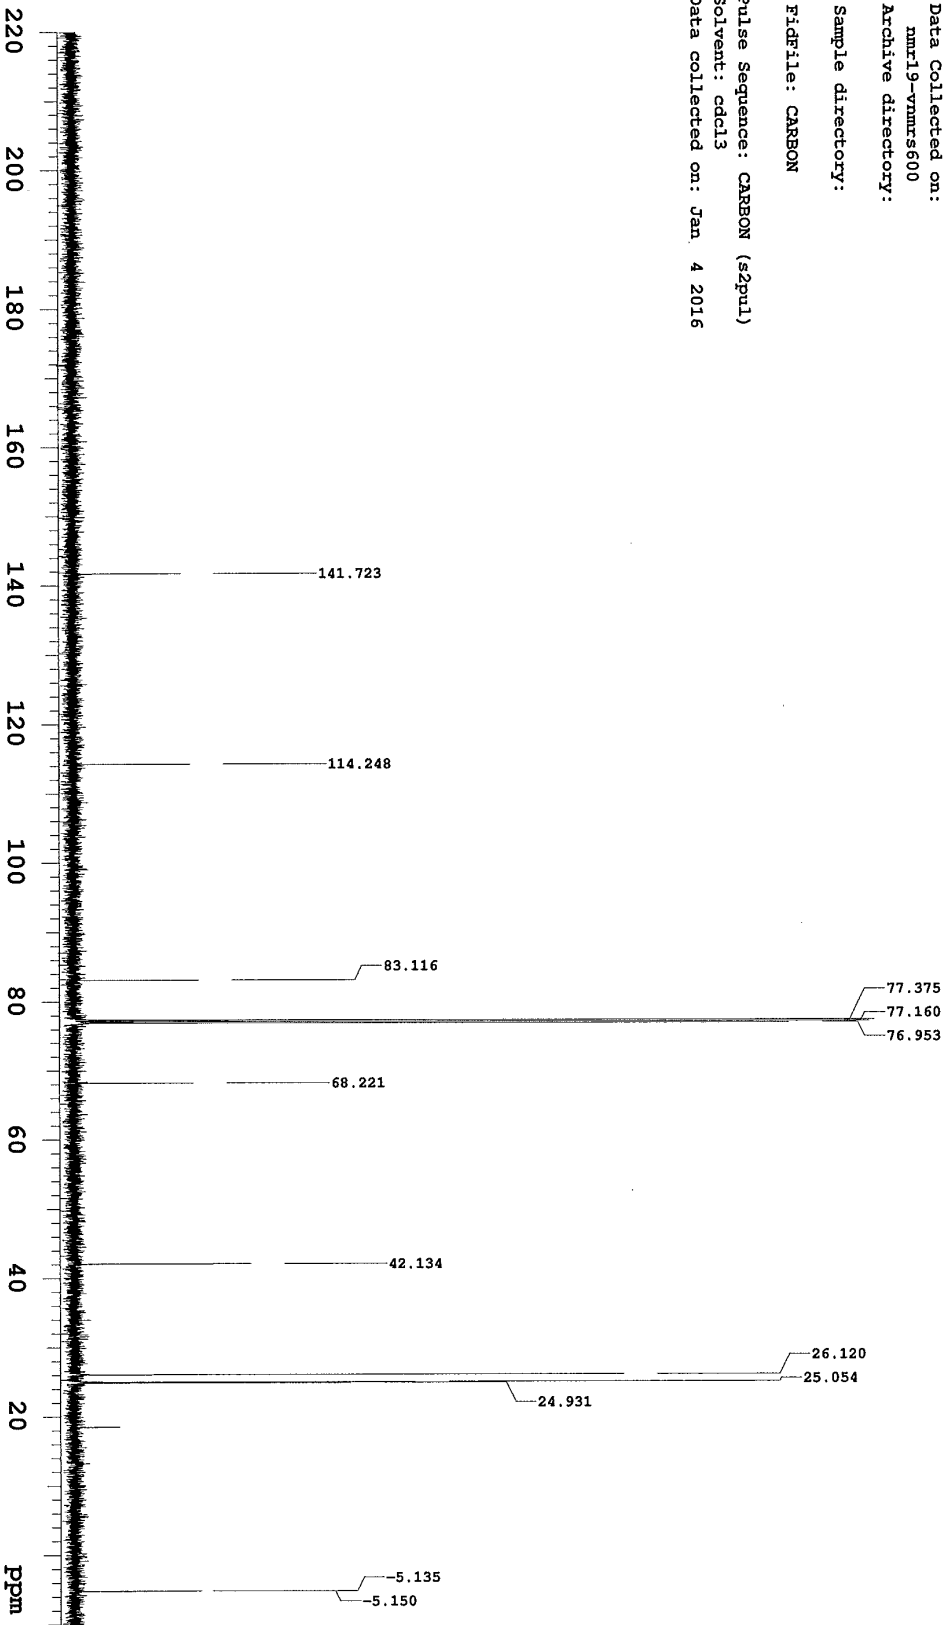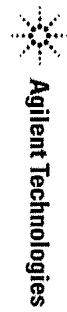

SR-V-246PD

Sample Name: sy-IV-61-*grude*  
Data Collected on: nmr13-vnmrs400  
Archive directory:

Sample directory:

Fidfile: PROTON

Pulse Sequence: PROTON (s2pul1)  
Solvent: cdcl3  
Data collected on: Dec 25 2015

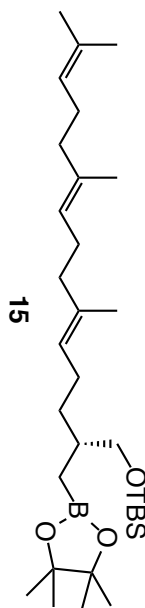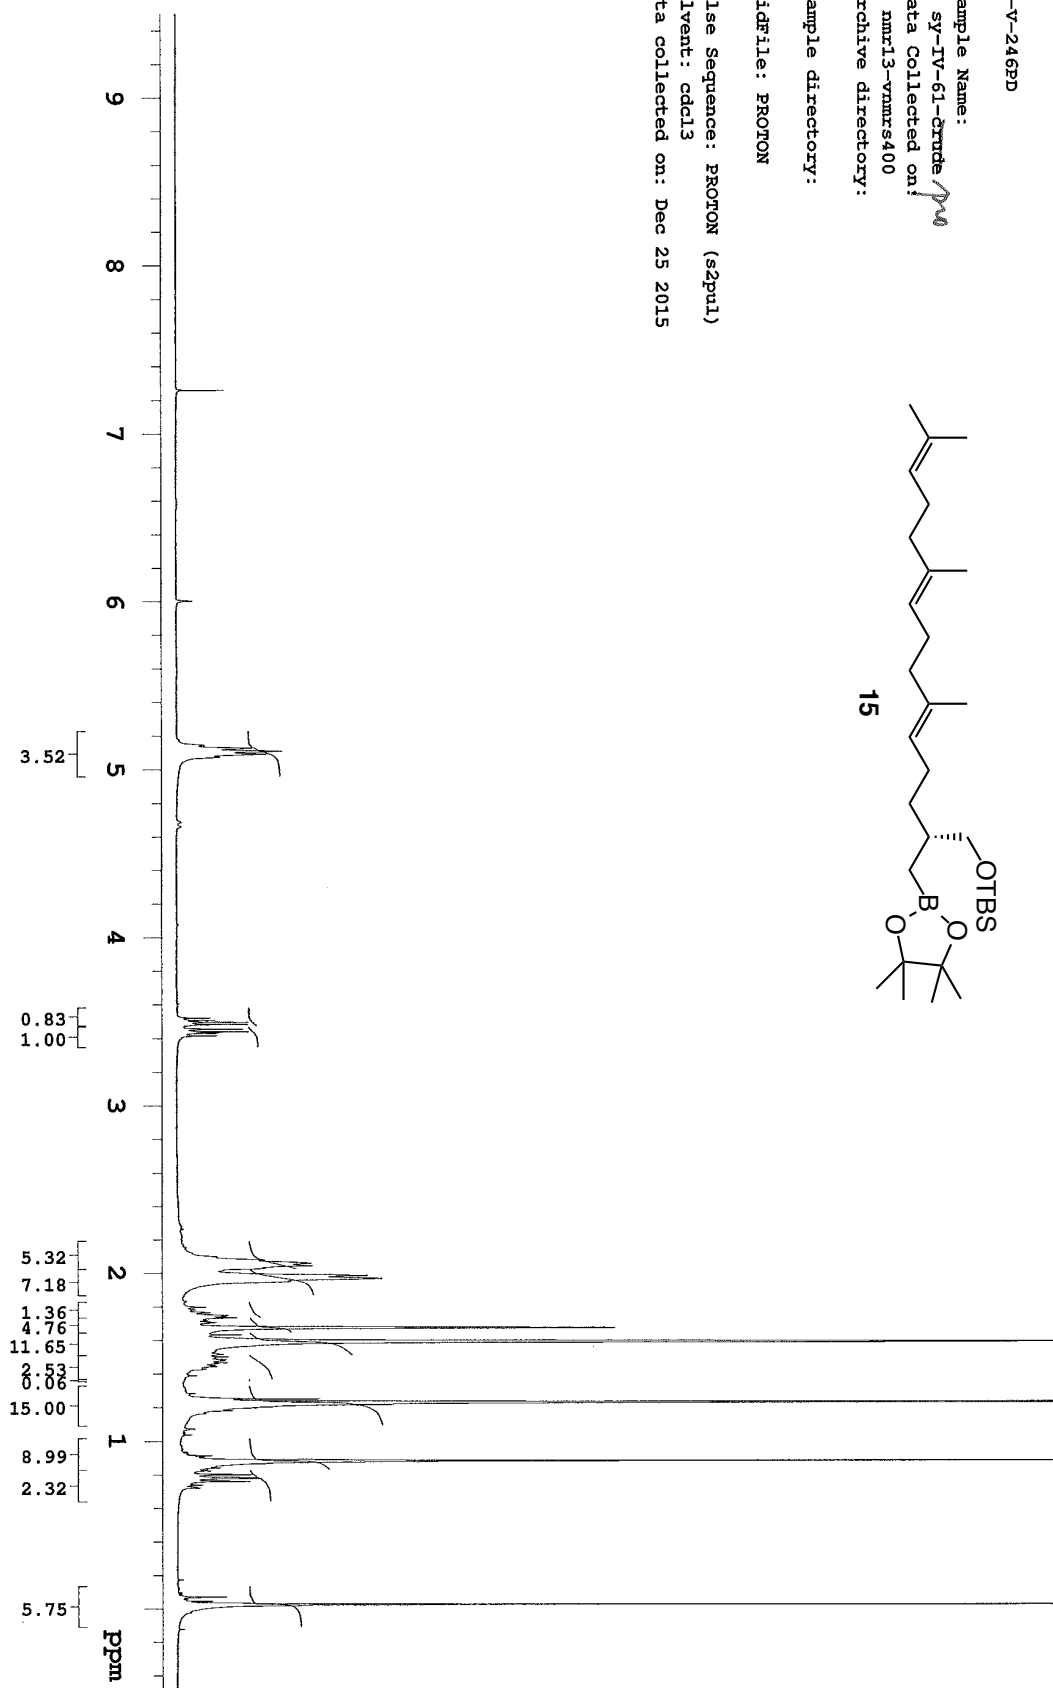



SR-V-246PD

Sample Name:

sy-IV-61-crude

Data Collected on:

nmr13-vnmrs400

Archive directory:

Sample directory:

F1dFile: CARBON

Pulse Sequence: CARBON (s2pru1)

Solvent: cdcl3

Data collected on: Dec 25 2015

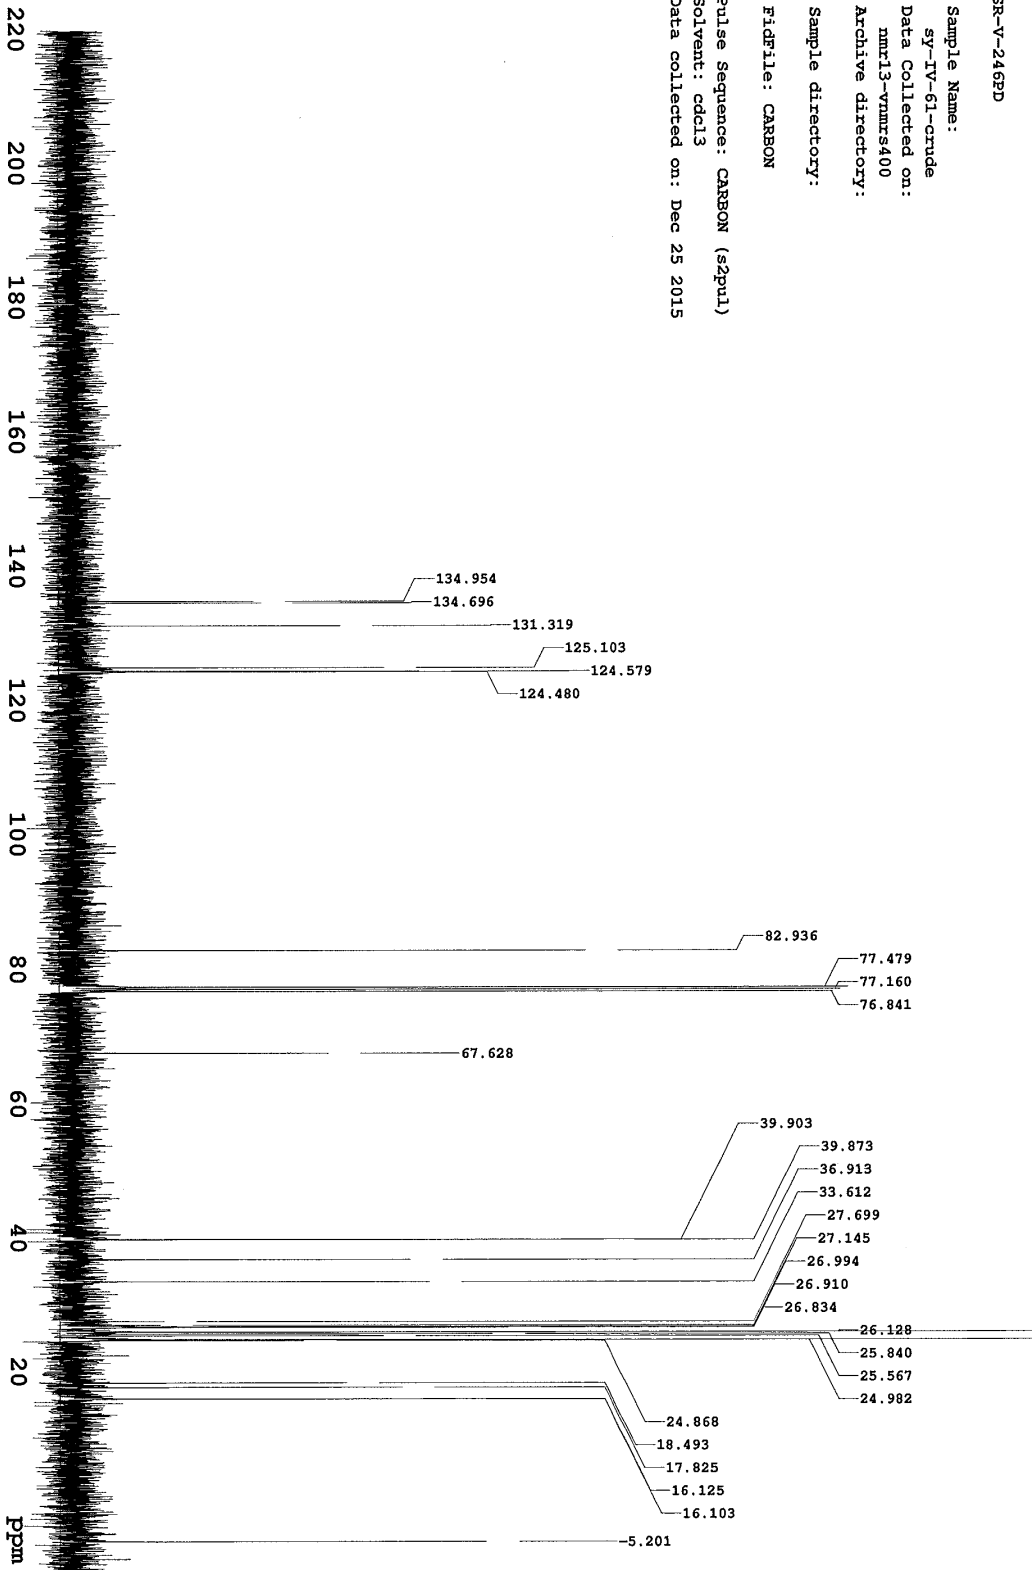

KS-01172H1quid

Sample Name:  
sy-iv-72-d-pro  
Data Collected on:  
nmr13-vnmr5400  
Archive directory:

Sample directory:

F1DF1le: PROTON

Pulse Sequence: PROTON (s2pul)  
Solvent: cdcl3  
Data collected on: Jan 7 2016

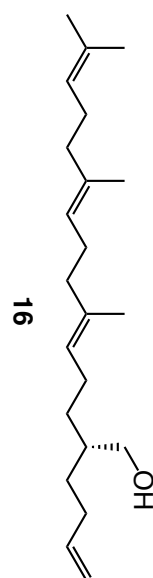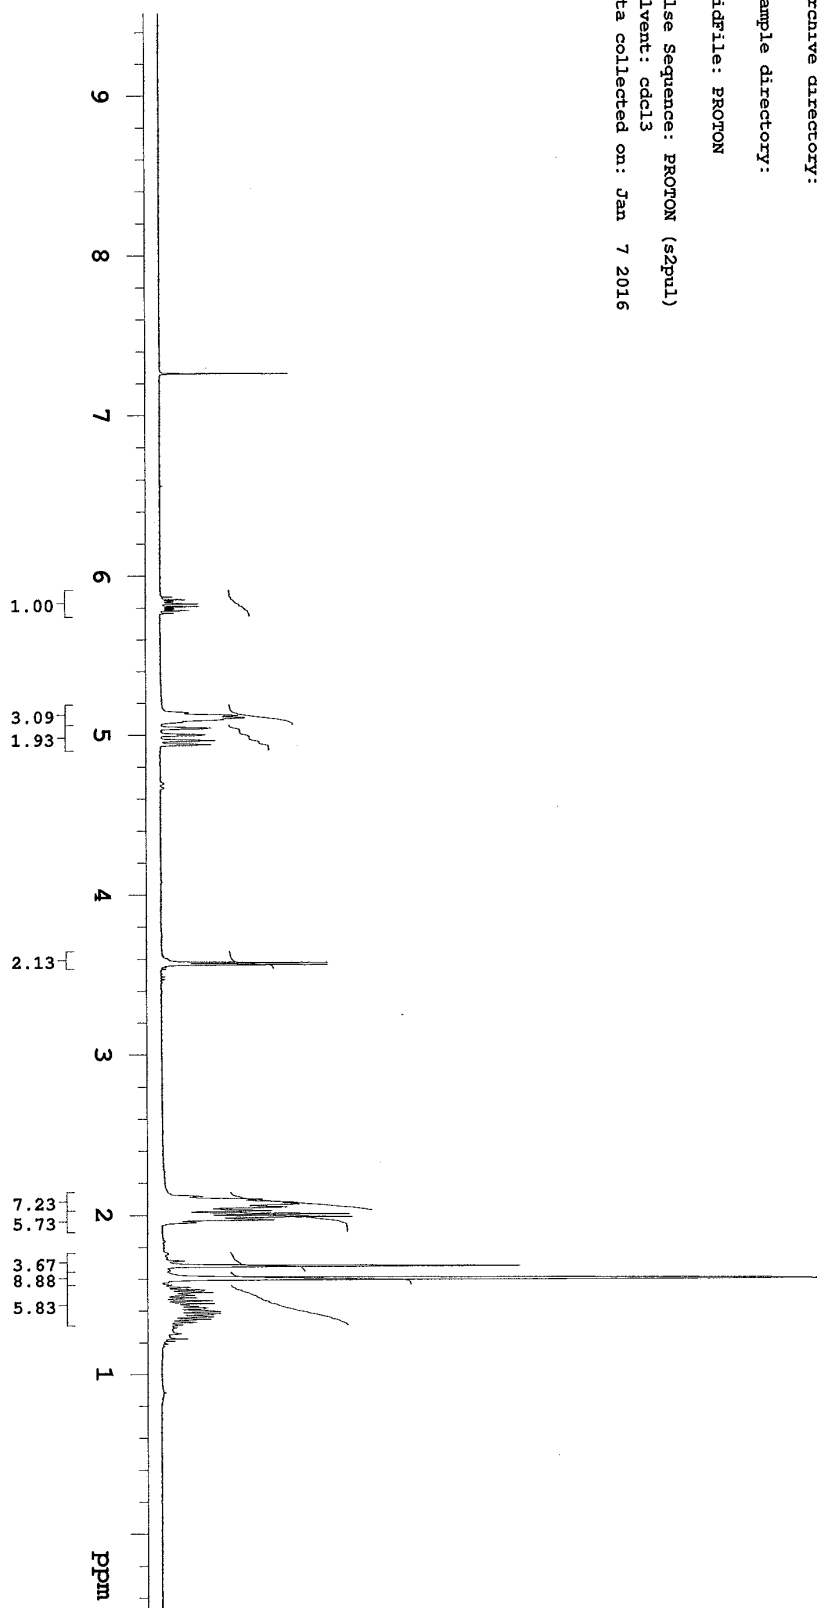

MJK-V-223B-19F, crude

Sample Name:

sy-IV\_72-pro

Data Collected on:

nmr13-vmmrs400

Archive directory:

Sample directory:

Fidfile: CARBON

Pulse Sequence: CARBON (s2pul)

Solvent: cdcl3

Data collected on: Jan 7 2016

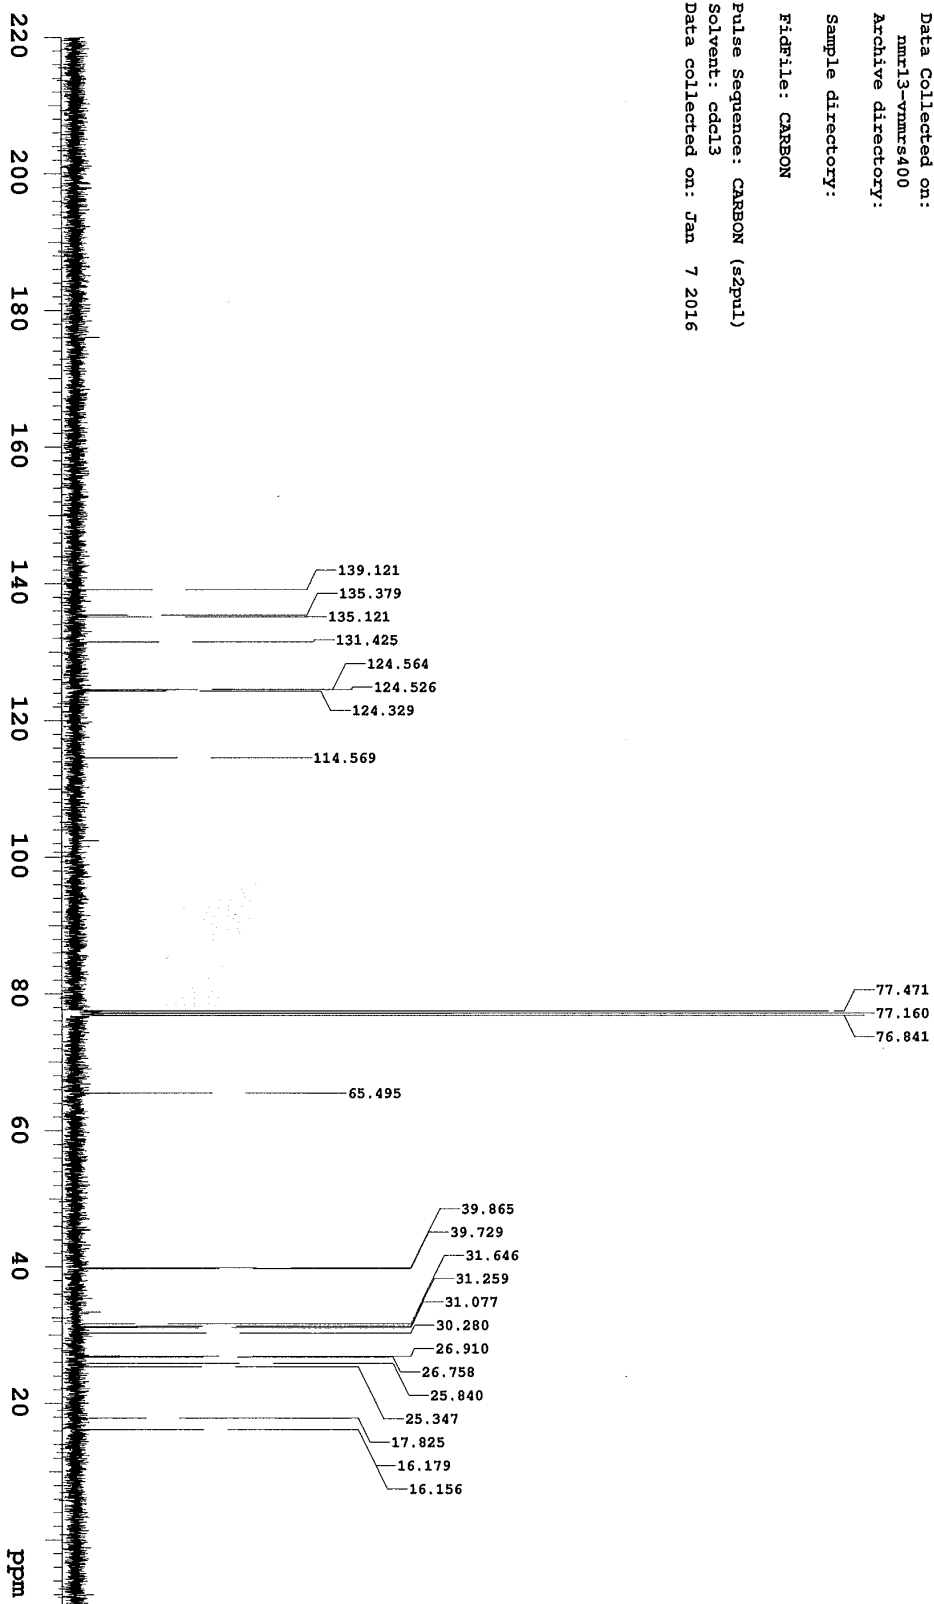

XS-01172H1.qpid

Sample Name:  
sy-IV-74-2-pro  
Data Collected on:  
nmr13-vnmrs400  
Archive directory:

Sample directory:

FidFile: PROTON

Pulse Sequence: PROTON (s2pul)  
Solvent: cdcl3  
Data collected on: Jan 8 2016

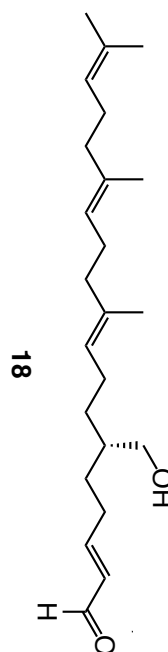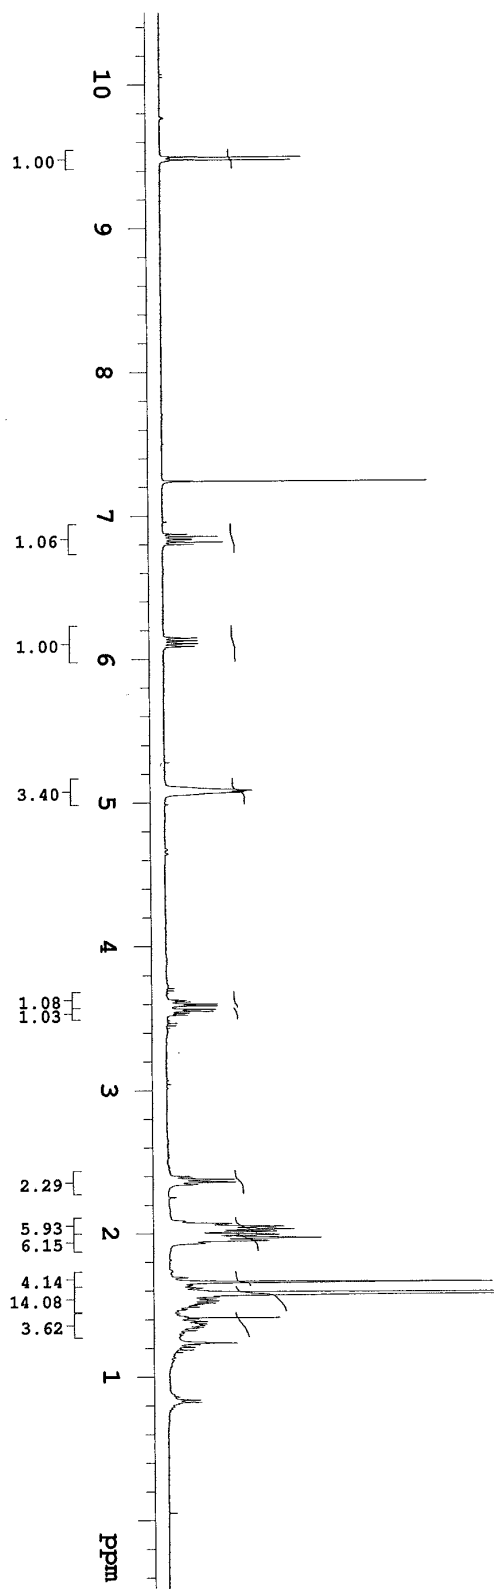

TN3-128A1-13C

Sample Name:

sy-IV-57-a-pro-C

Data Collected on:

mmr19-vmmr600

Archive directory:

Sample directory:

Fidfile: CARBON

Pulse Sequence: CARBON (s2pu1)

Solvent: cdcl3

Data collected on: Dec 20 2015

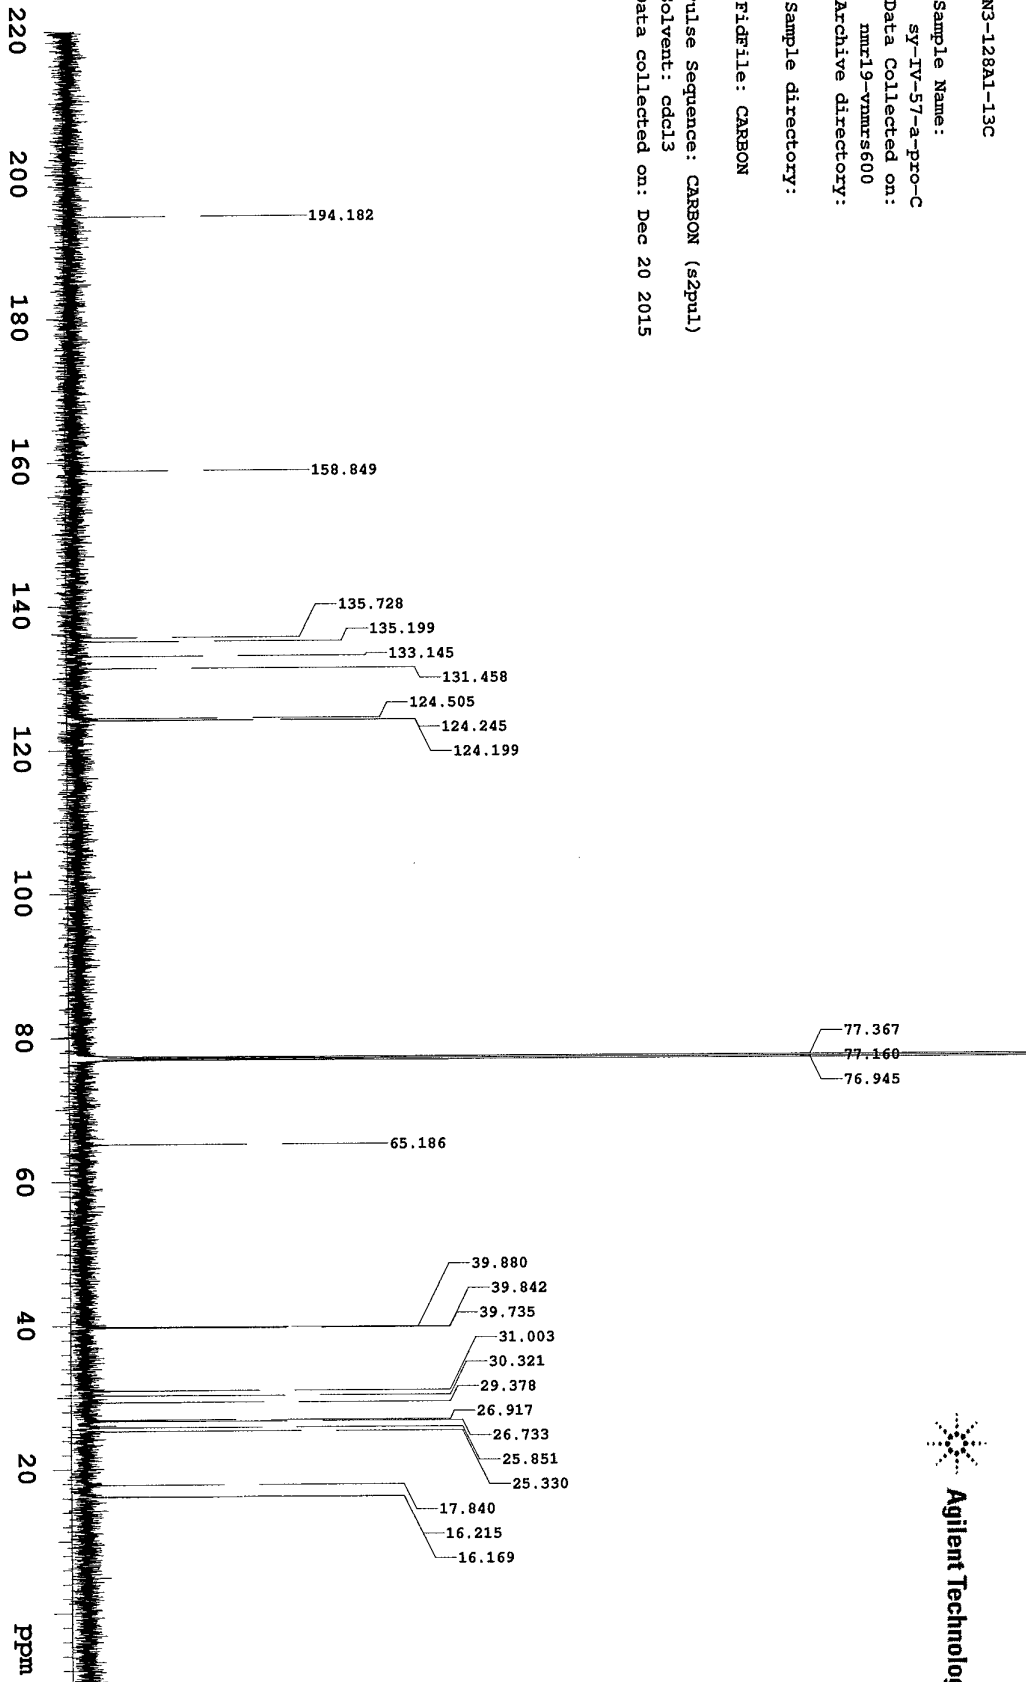

FV-III-049-c  
Chloro Allyl Epin Addn - tBu cat  
1/8/16

Sample Name:  
sy-IV-75-pro  
Data Collected on:  
nmr19-vnmr600  
Archive directory:

Sample directory:  
FidFile: sy-IV-75-pro  
Pulse Sequence: PROTON (s2pu1)  
Solvent: cdcl3  
Data collected on: Jan 8 2016

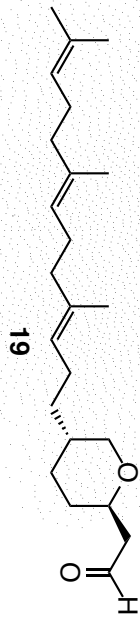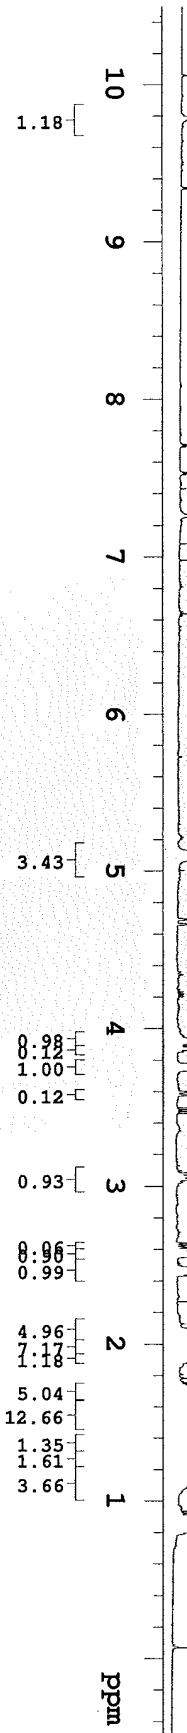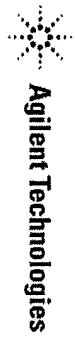

TM3-128A1-13C

Sample Name:

sy6-IV-75-pro-C

Data Collected on:

nmr19-vnmr5600

Archive directory:

Sample directory:

FidFile: CARBON

Pulse Sequence: CARBON (s2pul)

Solvent: cdcl3

Data collected on: Jan 8 2016

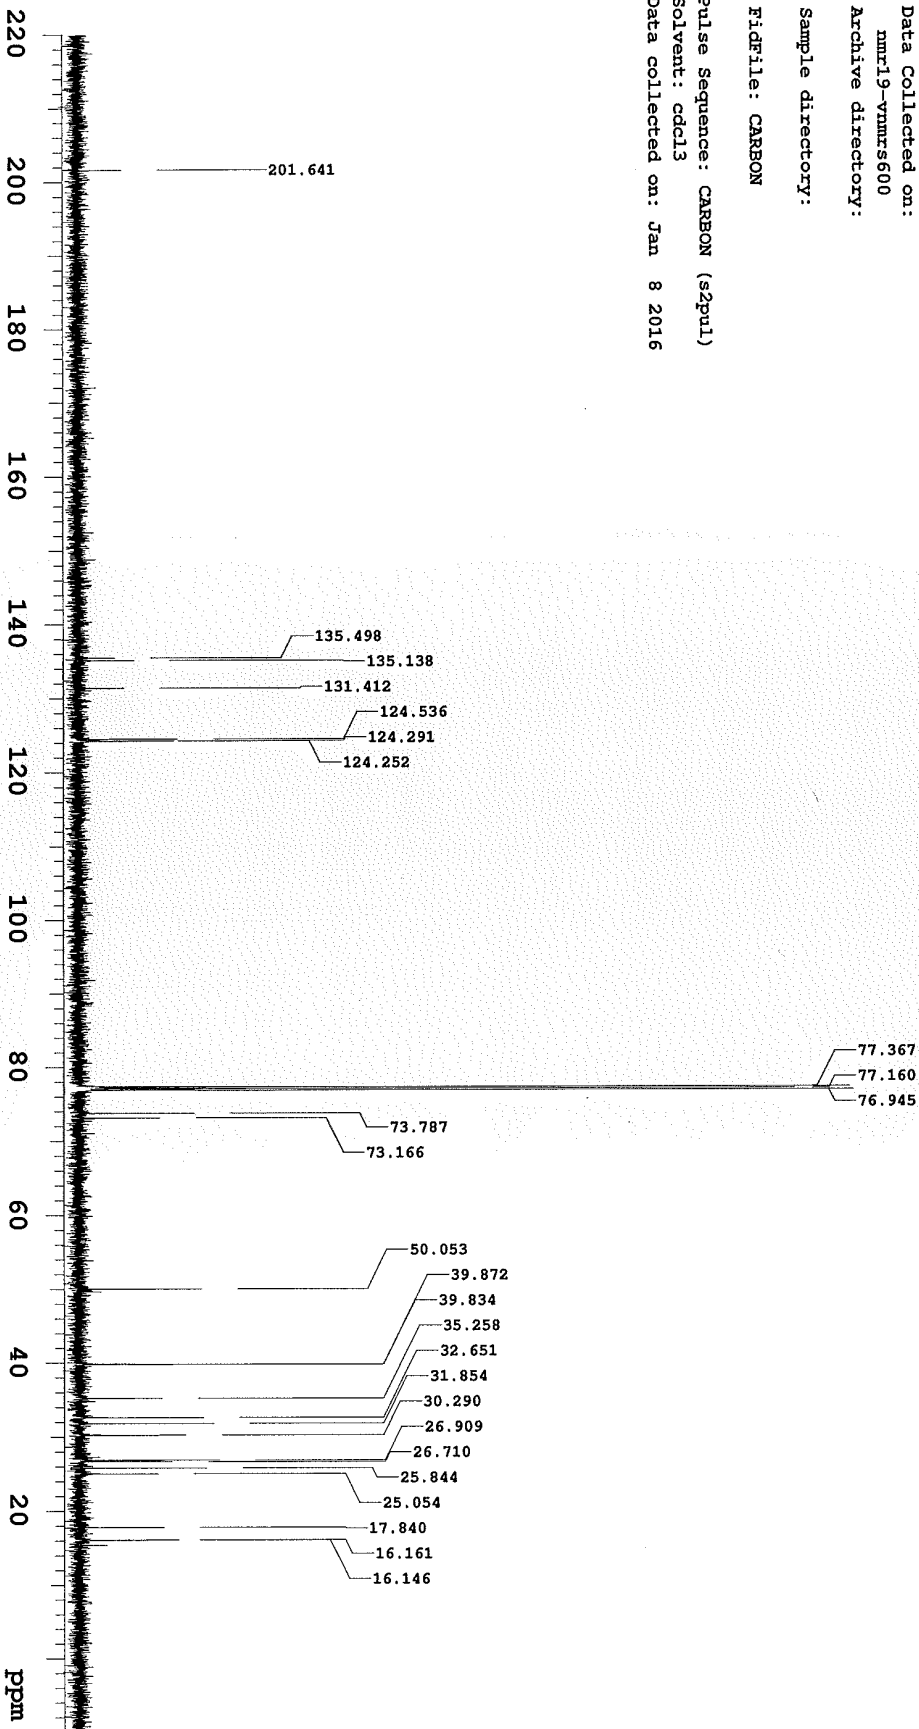

Supplement: NIHMS768916-supplement-Supporting_Information.pdf [file NIHMS768916-supplement-Supporting_Information.pdf]
